# Supplementary material
Source: Research Square preprint supplement (doi:10.21203/rs.3.rs-9556645/v1)
Supplement: Supplementary file 2 [file 6e6aecff3827f87841b25d1b.docx]

**Adaptive and scalable catalyst discovery with composable intelligence**

Wentao Li⸸1, Qilong Cai⸸2, Qi Lei⸸1, Jinxing Chen2, Ruixuan Chen1, Jiangjie Qiu1, Botian Wang3, Kai Zhao1, Zemeng Wang1, Yijun Li1, Jun Yin2, Fangfang Li5, Hongxuan Liu4, Yingdong Lu5, Yawen Ouyang3, Manu Suvarna6, Wei-Ying Ma3, Ya-Qin Zhang3, Kostya S. Novoselov7, Hao Zhou*3,8, Jiong Lu*2, Xiaonan Wang*1

**Affiliations:**

1 Beijing Key Laboratory of Artificial Intelligence for Advanced Chemical Engineering Materials, Department of Chemical Engineering, Tsinghua University, Beijing, China

2 Department of Chemistry, National University of Singapore, Singapore, Singapore

3 Institute for AI Industry Research (AIR), Tsinghua University, Beijing, China

4 Department of Chemical Engineering, Massachusetts Institute of Technology, Cambridge, MA, USA

5 State Key Laboratory of Advanced Optical Polymer and Manufacturing Technology, Wanhua Chemical Group Co., Ltd., Yantai 264000, P. R. China

6 Department of Biotechnology & Enzyme Catalysis, University of Greifswald, Greifswald, Germany

7 Institute for Functional Intelligent Materials, National University of Singapore, Singapore, Singapore

8 Shanghai Artificial Intelligence Laboratory, Shanghai, China

**Corresponding author**

* Hao Zhou, Jiong Lu, Xiaonan Wang.

Email: [zhouhao@air.tsinghua.edu.cn](mailto:zhouhao@air.tsinghua.edu.cn), [chmluj@nus.edu.sg](mailto:chmluj@nus.edu.sg), [wangxiaonan@tsinghua.edu.cn](mailto:wangxiaonan@tsinghua.edu.cn)

**Author Contributions**

⸸ These authors contribute equally.

**Supplementary Information**

This Supplementary Information mirrors the main text and provides full technical detail for each component of CatAI. **Section S1** describes the model architecture and pretrained module library. **Section S2** summarizes baseline methods and presents benchmark evaluations that validate CatAI's universality, transferability, and module fusion mechanism. **Section S3** details large-scale virtual screening for polyolefin elastomer catalysts. **Section S4** describes closed-loop optimization for heterogeneous photocatalytic C–O coupling. **Section S5** examines CatAI's extensibility through extensible learning experiments, life-cycle analysis of the discovered catalysts, and the community platform interface. **Section S6** provides references, and **Section S7** presents NMR spectra of purified products.

Contents

[S1. Technical Architecture and Pretrained Module Library of CatAI 7](#_Toc227957449)

[1.1 Geometric graph neural network backbone 8](#_Toc227957450)

[1.2 The module library 10](#_Toc227957451)

[S2. Benchmark Evaluation: Universality, Transferability, and Module Fusion 15](#_Toc227957452)

[2.1 Baseline model descriptions 16](#_Toc227957453)

[2.2 Benchmark results of general catalytic property prediction 19](#_Toc227957454)

[2.3 Benchmark results of few-shot catalytic property prediction 22](#_Toc227957455)

[2.4 Benchmark results of active learning minimal adsorption energy discovery 27](#_Toc227957456)

[2.5 Benchmark results of domain catalytic property prediction 30](#_Toc227957457)

[2.6 Ablation study of module fusion mechanism 32](#_Toc227957458)

[S3. Large-Scale Virtual Screening for Polyolefin Elastomer Catalysts 35](#_Toc227957459)

[3.1 Design space definition by literature mining 36](#_Toc227957460)

[3.2 Computational workflow 38](#_Toc227957461)

[3.3 Automated catalyst generation 43](#_Toc227957462)

[3.4 Large-scale catalyst screening 47](#_Toc227957463)

[3.5 Synthetic route of CPP-Zr 48](#_Toc227957464)

[3.6 Catalyst performance and polymer property 52](#_Toc227957465)

[S4. Closed-Loop Optimization for Heterogeneous Photocatalytic C–O Coupling 58](#_Toc227957466)

[4.1 Design space definition by literature mining 59](#_Toc227957467)

[4.2 Model architecture for active learning framework 60](#_Toc227957468)

[4.3 Synthesis of optimized catalysts 61](#_Toc227957469)

[4.4 Substrate scope 62](#_Toc227957470)

[4.5 Catalyst performance comparison 66](#_Toc227957471)

[4.6 Catalyst stability performance 67](#_Toc227957472)

[S5. Extensibility: Extensible Learning, Life-Cycle Analysis, and Community Platform 68](#_Toc227957473)

[5.1 Extensibility of CatAI 69](#_Toc227957474)

[5.2 Life cycle analysis of CG-Ti and CPP-Zr 72](#_Toc227957475)

[5.3 CatAI platform for community usage 77](#_Toc227957476)

[S6. References 78](#_Toc227957477)

[S7. NMR spectra of purified products 81](#_Toc227957478)

**Supplementary Figures**

[**Supplementary Fig 1.** Property distribution in different module training dataset (Part 1). 13](#_Toc227957479)

[**Supplementary Fig 2.** Property distribution in different module training dataset (Part 2). 14](#_Toc227957480)

[**Supplementary Fig 3.** Per-round Active-learning average performance for adsorption-energy minimization. Mean optimization curves over 40 independent repeats for ten active-learning rounds targeting minimal *CH2 (top) and *O (bottom) adsorption energies. Each panel reports the round-wise average of the best value identified so far and the corresponding Top-3 hit rate. 27](#_Toc227957481)

[**Supplementary Fig 4.** Active-learning performance for identifying catalysts with minimal adsorption energies. The points along each horizontal line denote the minimum adsorption energies identified in individual runs, and the collection of 40 such values defines the corresponding empirical distribution. 28](#_Toc227957482)

[**Supplementary Fig 5.** Active-learning performance for adsorption-energy minimization. Per-round mean minimal validation loss for *CH2 (left) and *O (right) adsorption benchmarks, illustrating the rate at which different models improve under active learning. 29](#_Toc227957483)

[**Supplementary Fig 6.** Literature-derived activity distribution of metallocene catalysts by metal center. 36](#_Toc227957484)

[**Supplementary Fig** **7**. Catalytic mechanisms for ethylene/1-octene copolymerization to POE. 38](#_Toc227957485)

[**Supplementary Fig 8.** Energy profiles for the elementary steps catalyzed by **Cat 2**. 41](#_Toc227957486)

[**Supplementary Fig 9.** Energy profiles for the elementary steps catalyzed by **CPP-Zr**. 42](#_Toc227957487)

[**Supplementary Fig 10.** POE catalyst ligands with CatAI-predicted activity [104 kg/(mol·h)]. 47](#_Toc227957488)

[**Supplementary Fig 11.** Synthetic route of **CPP-Zr**. 48](#_Toc227957489)

[**Supplementary Fig 12.** Morphological comparison of **CG-Ti** (left) and **CPP-Zr** (right). 51](#_Toc227957490)

[**Supplement Fig 13.** Molecular weight characterization of polymer synthesized with **CG-Ti**. (a) GPC chromatogram and (b) molecular weight distribution. 55](#_Toc227957491)

[**Supplement Fig 14.** Molecular weight characterization of polymer synthesized with **CPP-Zr**. (a) GPC chromatogram and (b) molecular weight distribution. 56](#_Toc227957492)

[**Supplement Fig 15.** Macroscopic morphology of POE produced using **CG-Ti** (left) and **CPP-Zr** (right) catalysts. 57](#_Toc227957493)

[**Supplementary Fig 16.** Architecture of the condition-encoded model. 60](#_Toc227957494)

[**Supplementary Fig 17.** Catalyst performance comparison. 66](#_Toc227957495)

[**Supplementary Fig 18.** Recycling experiment. 67](#_Toc227957496)

[**Supplementary Fig 19.** Input information of **CG-Ti** for GWP prediction. 72](#_Toc227957497)

[**Supplementary Fig** **20.** Input information of **CPP-Zr** for GWP prediction. 73](#_Toc227957498)

[**Supplementary Fig 21.** CatAI interface for catalyst property prediction. 77](#_Toc227957499)

**Supplementary Tables**

[**Supplementary Table 1.** Hyperparameters of geometric graph neural network backbone. 9](#_Toc227957500)

[**Supplementary Table 2.** Task taxonomy and data volume for the CatAI pretraining corpus across stability, mechanical, electronic, transport, thermodynamic and surface property prediction tasks. 10](#_Toc227957501)

[**Supplementary Table 3.** Model performance on Alloy-GMAE (5-fold experiments). 19](#_Toc227957502)

[**Supplementary Table 4.** Model performance on FG-GMAE (5-fold experiments). 19](#_Toc227957503)

[**Supplementary Table 5.** Model performance on OCD-GMAE (5-fold experiments). 19](#_Toc227957504)

[**Supplementary Table 6.** Model performance on Desorption-OC20 (5-fold experiments). 20](#_Toc227957505)

[**Supplementary Table 7.** Model performance on Dissociation-OC20 (5-fold experiments). 20](#_Toc227957506)

[**Supplementary Table 8.** Model performance on Transfer-OC20 (5-fold experiments). 21](#_Toc227957507)

[**Supplementary Table 9.** Comparison between CatAI and the originally reported AdsMT results on Alloy-GMAE. (random split; different split partitions). 21](#_Toc227957508)

[**Supplementary Table 10.** Comparison between CatAI and the originally reported AdsMT results on FG-GMAE. (random split; different split partitions). 21](#_Toc227957509)

[**Supplementary Table 11.** Model performance on 8-shot Alloy-GMAE (5-fold experiments). 22](#_Toc227957510)

[**Supplementary Table 12.** Model performance on 16-shot Alloy-GMAE (5-fold experiments). 22](#_Toc227957511)

[**Supplementary Table 13.** Model performance on 32-shot Alloy-GMAE (5-fold experiments). 22](#_Toc227957512)

[**Supplementary Table 14.** Model performance on 64-shot Alloy-GMAE (5-fold experiments). 23](#_Toc227957513)

[**Supplementary Table 15.** Model performance on 128-shot Alloy-GMAE (5-fold experiments). 23](#_Toc227957514)

[**Supplementary Table 16.** Model performance on 256-shot Alloy-GMAE (5-fold experiments). 24](#_Toc227957515)

[**Supplementary Table 17.** Model performance on 8-shot FG-GMAE (5-fold experiments). 24](#_Toc227957516)

[**Supplementary Table 18.** Model performance on 16-shot FG-GMAE (5-fold experiments). 24](#_Toc227957517)

[**Supplementary Table 19.** Model performance on 32-shot FG-GMAE (5-fold experiments). 25](#_Toc227957518)

[**Supplementary Table 20.** Model performance on 64-shot FG-GMAE (5-fold experiments). 25](#_Toc227957519)

[**Supplementary Table 21.** Model performance on 128-shot FG-GMAE (5-fold experiments). 25](#_Toc227957520)

[**Supplementary Table 22.** Model performance on 256-shot FG-GMAE (5-fold experiments). 26](#_Toc227957521)

[**Supplementary Table 23.** Model performance on thermocatalysis ethylene binding energy (5-fold experiments). 30](#_Toc227957522)

[**Supplementary Table 24.** Model performance on photocatalysis electron affinity energy (5-fold experiments). 30](#_Toc227957523)

[**Supplementary Table 25.** Model performance on electrocatalysis OH* adsorption energy (5-fold experiments). 30](#_Toc227957524)

[**Supplementary Table 26.** Model performance on electrocatalysis O* adsorption energy (5-fold experiments). 31](#_Toc227957525)

[**Supplementary Table 27.** Ablation study of module fusion mechanism on Alloy-GMAE (5-fold experiments). 32](#_Toc227957526)

[**Supplementary Table 28.** Ablation study of module fusion mechanism on FG-GMAE (5-fold experiments). 32](#_Toc227957527)

[**Supplementary Table 29.** Ablation study of module fusion mechanism on OCD-GMAE (5-fold experiments). 32](#_Toc227957528)

[**Supplementary Table 30.** Ablation study of module fusion mechanism on Desorption-OC20 (5-fold experiments). 33](#_Toc227957529)

[**Supplementary Table 31.** Ablation study of module fusion mechanism on Dissociation-OC20 (5-fold experiments). 33](#_Toc227957530)

[**Supplementary Table 32.** Ablation study of module fusion mechanism on Transfer-OC20 (5-fold experiments). 34](#_Toc227957531)

[**Supplementary Table 33.** Visualization of automated generated structures. 44](#_Toc227957532)

[**Supplementary Table 34.** Performance comparison of CatAI-recommended catalysts with previously reported POE catalysts. 52](#_Toc227957533)

[**Supplementary Table 35.** Comparison of calculated and experimental catalyst activities. 53](#_Toc227957534)

[**Supplementary Table 36. CPP-Zr** activity across reactor scales. 54](#_Toc227957535)

[**Supplementary Table 37.** Properties introduced with each five-module increment in the extensible learning experiment. 69](#_Toc227957536)

[**Supplementary Table 38.** Model performance on Alloy-GMAE with module increase (5-fold experiments). 69](#_Toc227957537)

[**Supplementary Table 39.** Model performance on FG-GMAE with module increase (5-fold experiments). 70](#_Toc227957538)

[**Supplementary Table 40.** Model performance on Dissociation-OC20 with module increase (5-fold experiments). 70](#_Toc227957539)

[**Supplementary Table 41.** Model performance on Transfer-OC20 with module increase (5-fold experiments). 70](#_Toc227957540)

[**Supplementary Table 42.** Life cycle inventory of **CG-Ti**. 74](#_Toc227957541)

[**Supplementary Table 43.** Carbon footprint factor of **CG-Ti**. 74](#_Toc227957542)

[**Supplementary Table 44.** Life cycle inventory of CatAI-designed catalyst **CPP-Zr**. 75](#_Toc227957543)

[**Supplementary Table 45.** Carbon footprint factor of CatAI-designed catalyst **CPP-Zr**. 75](#_Toc227957544)

# Technical Architecture and Pretrained Module Library of CatAI

CatAI rests on two design principles: a geometric graph neural network backbone that encodes rotation- and translation-equivariant atomic interactions, and a modular library of independently pretrained encoders, each targeting a distinct physicochemical property family. **Section 1.1** describes the backbone architecture and hyperparameters; **Section 1.2** details the composition and data sources of the 30-module pretrained library. Together, these components underpin the module fusion and task-specific adaptation presented in the main text.

## Geometric graph neural network backbone

CatAI follows the JMP1 architecture, using GemNet-OC2 as its geometric backbone. GemNet-OC is a directional graph neural network designed for atomistic systems in which nodes represent atoms and edges represent interatomic interactions. GemNet-OC enriches message passing with distance-, angle-, and dihedral-informed geometric features by combining radial basis functions with angular bases. It extends beyond pairwise interactions by incorporating triplet and quadruplet coupling terms, enabling the model to represent higher-order local geometry that is important for catalysis-related energetics.

The hyperparameters of geometric graph neural network backbone are shown in **Supplementary Table 1**.

**Supplementary Table 1.** Hyperparameters of geometric graph neural network backbone.

| **Name** | **Value** |
| --- | --- |
| Num spherical | 7 |
| Num radial | 128 |
| Num blocks | 6 |
| Emb size atom | 256 |
| Emb size edge | 1024 |
| Emb size trip in | 64 |
| Emb size trip out | 128 |
| Emb size quad in | 64 |
| Emb size quad out | 32 |
| Emb size rbf | 32 |
| Emb size sbf | 64 |
| Num before skip | 2 |
| Num after skip | 2 |
| Cutoff (Å) | 12.0 |
| Max neighbors | 30 |
| Max neighbors aint | 1000 |
| Rbf | Gaussian |
| Envelope | Polynomial (Exponent 5) |
| Cbf | Spherical harmonics |
| Sbf | Legendre outer |
| Extensive | True |
| Output init | HeOrthogonal |
| Activation | SiLU |
| Quad interaction | True |
| Atom edge interaction | True |
| Edge atom interaction | True |
| Atom interaction | True |
| Num atom emb layers | 2 |
| Otf graph | True |

## The module library

**Supplementary Table 2.** Task taxonomy and data volume for the CatAI pretraining corpus across stability, mechanical, electronic, transport, thermodynamic and surface property prediction tasks.

| **Group** | **Property** | **Description** | **Size** |
| --- | --- | --- | --- |
| Stability | MP formation energy3 | Formation energy () relative to the constituent elemental reference states, quantifying the thermodynamic driving force for compound formation. | 132752 |
| Stability | MP energy above hull3 | Energy above the convex hull ( ), a thermodynamic metric of (meta)stability with respect to decomposition into competing phases. | 116625 |
| Stability | Castelli formation energy4 | Formation energy () relative to elemental reference states for perovskite compositions, quantifying the thermodynamic driving force for compound formation. | 18928 |
| Stability | JARVIS formation energy5 | Formation energy () relative to elemental reference states, quantifying the thermodynamic driving force for compound formation. | 25923 |
| Stability | JARVIS total energy5 | Total energy from first-principles calculations, serving as the thermodynamic potential used to compare relative stability across structures. | 66119 |
| Stability | OQMD energy above hull6 | Energy above the convex hull (), used to quantify phase stability within the OQMD dataset. | 207851 |
| Stability | OQMD stability label6 | Binary/ordinal label indicating phase stability, typically based on whether a structure lies on or sufficiently close to the convex hull. | 201085 |
| Stability | QMOF total energy7,8 | Total energy of the MOF system from electronic-structure calculations, used as the thermodynamic potential for assessing relative stability. | 31675 |
| Mechanical | JARVIS shear modulus (VRH)5 | Shear modulus () obtained via Voigt–Reuss–Hill averaging, quantifying resistance to shear deformation. | 10855 |
| Mechanical | JARVIS bulk modulus (VRH)5 | Bulk modulus () obtained via Voigt–Reuss–Hill averaging, quantifying resistance to volumetric compression. | 11028 |
| Mechanical | MP shear modulus (VRH)3 | Shear modulus () obtained via Voigt–Reuss–Hill averaging, quantifying resistance to shear deformation. | 10987 |
| Mechanical | MP bulk modulus (VRH)3 | Bulk modulus () obtained via Voigt–Reuss–Hill averaging, quantifying resistance to volumetric compression. | 10987 |
| Electronic | MP band gap3 | Electronic band gap (), defined as the energy separation between the valence-band maximum and the conduction-band minimum in semiconductors and insulators. | 106113 |
| Electronic | MP Fermi level3 | Fermi level (), i.e., the electronic chemical potential; operationally the highest occupied energy at 0 K. | 150980 |
| Electronic | JARVIS band gap5 | Electronic band gap (), defined as the energy separation between the valence-band maximum and the conduction-band minimum in semiconductors and insulators. | 23455 |
| Electronic | Electronic energy9 | Total electronic energy of the system, representing the energy of the electronic state in the underlying quantum-mechanical description. | 108538 |
| Electronic | Metal partial charge9 | Partial charge on the metal center derived from charge-density analysis (e.g., Bader-type partitioning). | 108538 |
| Electronic | HOMO–LUMO gap9 | HOMO–LUMO gap, defined as the energy difference between the highest occupied molecular orbital and the lowest unoccupied molecular orbital. | 108538 |
| Electronic | DOS Fermi level3 | Fermi level (), i.e., the electronic chemical potential; operationally the highest occupied energy at 0 K. | 16044 |
| Electronic | OQMD band gap6 | Electronic band gap (), defined as the energy separation between the valence-band maximum and the conduction-band minimum in semiconductors and insulators. | 4889 |
| Electronic | QMOF band gap7,8 | MOF electronic band gap (), defined as the energy separation between the valence-band maximum and the conduction-band minimum. | 31675 |
| Electronic | CEPDB power conversion efficiency10 | Power conversion efficiency (PCE), defined as the ratio of electrical output power to incident optical power under standardized illumination conditions. | 126315 |
| Transport | n-type thermal conductivity11 | Electronic thermal conductivity for n-type transport, describing heat carried by electrons under a temperature gradient. | 37390 |
| Transport | p-type thermal conductivity11 | Electronic thermal conductivity for p-type transport, describing heat carried by holes under a temperature gradient. | 37390 |
| Transport | n-type electrical conductivity11 | Electrical conductivity for n-type transport, describing charge carried by electrons under an applied electric field. | 37390 |
| Transport | p-type electrical conductivity11 | Electrical conductivity for p-type transport, describing charge carried by holes under an applied electric field. | 37390 |
| Thermodynamic | Gibbs free energy | Gibbs free energy (G), the thermodynamic potential governing reaction spontaneity under constant temperature and pressure. | 16718 |
| Thermodynamic | Activation energy barrier | Activation energy barrier () for catalytic elementary steps, capturing kinetic accessibility by the minimum energy required to reach the transition state. | 6350 |
| Surface | Surface energy12 | Surface energy (γ), the excess free energy per unit area associated with creating a surface from the bulk. | 4519 |
| Surface | Single atom catalyst adsorption energy13 | Adsorption energy (), defined as the total-energy change upon binding an adsorbate to a catalyst surface. | 1648 |

**Supplementary Fig 1.** Property distribution in different module training dataset (Part 1).

**Supplementary Fig 2.** Property distribution in different module training dataset (Part 2).

# Benchmark Evaluation: Universality, Transferability, and Module Fusion

This section documents the benchmark evaluation of CatAI. **Section** **2.1** summarizes the baseline methods. The remainder of this section evaluates CatAI along three axes: universality across catalytic property prediction tasks (**Sections 2.2** and **2.5**), transferability under data-scarce conditions via few-shot learning and active learning (**Sections 2.3** and **2.4**), and the contribution of the module fusion mechanism as assessed through ablation studies (**Section 2.6**).

## Baseline model descriptions

**CGCNN (Crystal Graph Convolutional Neural Network)**14

CGCNN is an early and influential graph neural network designed specifically for periodic crystalline materials. It represents each crystal as a crystal graph in which nodes correspond to atoms and edges correspond to near-neighbour connections derived from the crystal structure. Each atom is initialized with a learnable embedding of its elemental identity, and each bond is encoded by a fixed-length feature vector that summarizes the local geometric relationship between two atoms, most notably interatomic distance and related radial descriptors.

**DimeNet++**15

DimeNet models atomistic systems with directional message passing that explicitly encodes local geometry. Messages are updated using both interatomic distances and angular information from atom triplets, where bond angles are expanded in a spherical Fourier–Bessel basis to capture orientation-dependent interactions. This design improves accuracy for properties that depend on local coordination geometry, but it is computationally demanding because message updates scale with the number of interacting pairs and triplets.

DimeNet++ retains the geometric inductive bias while reducing cost. It replaces the expensive bilinear interaction used in the directional block with an element-wise (Hadamard) product and compensates with lightweight MLPs applied to the basis features. In addition, it introduces down- and up-projection layers to use smaller embeddings in the most expensive parts of the network. These modifications preserve predictive performance while substantially improving efficiency.

**GemNet-OC**2

GemNet-OC is a directional graph neural network developed for large and chemically diverse catalytic datasets, in particular the Open Catalyst 2020 (OC20) benchmark. Building on the GemNet family, it augments atom–atom message passing with higher-order geometric context, including angular and dihedral information, to better represent the local coordination and reaction-relevant geometry that govern adsorption and surface reactivity.

To make such higher-order interactions practical at OC20 scale, GemNet-OC introduces architectural and implementation choices aimed at improving throughput while retaining accuracy, including an interaction hierarchy that better captures longer-range effects in extended adsorbate–surface systems.

**Equiformer**16

Equiformer is an E(3)-equivariant Transformer designed for 3D atomistic graphs, where atoms are nodes and geometry-dependent interactions are encoded on edges. Its core idea is to lift standard Transformer operations into an equivariant feature space built from irreducible representations, so that intermediate features and predictions transform correctly under rotations and translations. Practically, Equiformer combines equivariant attention with tensor-product–based mixing of scalar and higher-order features, allowing the model to exploit angular information beyond distance-only message passing.

**eSCN (Equivariant Spherical Channel Network)**17

eSCN is an SO(3)-equivariant graph neural network for atomistic systems that is built around a more efficient equivariant convolution operator. The key idea is to align each node embedding’s primary axis with the corresponding edge direction during message passing, which reduces the effective rotational freedom to SO(2). Under this alignment, the SO(3) tensor product becomes sparse, lowering the asymptotic cost from to in the representation degree , while also removing the need to explicitly compute Clebsch–Gordan coefficients.

**AdsMT (Adsorption Graph Transformer)**18

AdsMT is a surface-specific graph Transformer for encoding catalyst slabs in adsorption-energy prediction. It addresses a key limitation of existing GNN encoders—insufficient discrimination between top-layer and subsurface atoms—by introducing a height-based positional encoding derived from each atom’s fractional elevation relative to the underlying atomic plane. Architecturally, AdsMT combines RBF-expanded interatomic distances with element embeddings and stacked attention layers, and implements an edge-wise attention mechanism that computes attention and messages per edge before updating node states with normalization. This physically informed design enhances surface-structure understanding while emphasising adsorption-active atomic environments.

**JMP**1

JMP is an atomistic multi task model built on a shared GemNet-OC backbone. It encodes atoms and neighbouring pairs with a geometric message passing network, and couples this common 3D representation space to dataset specific energy and force heads for joint training across molecular and materials domains. In this way, JMP uses joint training over molecules and materials to produce transferable features for downstream atomic property prediction.

**ORB-v2**19

ORB-v2 is a universal neural network potential built on a graph network simulator with smoothed graph attention. It represents atomistic systems as periodic graphs, processes them through an encoder, a stack of message passing layers, and a decoder, and predicts energy, forces, and stress in a single forward pass. Rather than enforcing conservatism through energy gradients, ORB-v2 predicts forces directly and then imposes zero-net-force and torque corrections, which improves speed and scalability.

**ORB-v3**20

ORB-v3 is a family of universal interatomic potentials that retains the basic architecture of ORB-v2 while varying three structural choices: whether forces and stress are obtained directly or as energy gradients, whether local graphs use a finite neighbour cap, and which training corpus defines the final model. In this design, conservative variants can be regularized by equigrad to improve learned rotational invariance, whereas direct sparse graph variants favor much lower latency and memory cost. ORB-v3 therefore organizes model design as a controlled trade-off between physical constraint and computational scale.

## Benchmark results of general catalytic property prediction

**Supplementary Table 3.** Model performance on Alloy-GMAE (5-fold experiments).

| Model name | Split 0 | Split 1 | Split 2 | Split 3 | Split 4 | Mean MAE |
| --- | --- | --- | --- | --- | --- | --- |
| CGCNN | 0.157 | 0.128 | 0.120 | 0.135 | 0.125 | 0.133 |
| SchNet | 0.140 | 0.121 | 0.113 | 0.111 | 0.120 | 0.121 |
| DimeNet++ | 0.098 | 0.094 | 0.087 | 0.081 | 0.089 | 0.090 |
| Equiformer | 0.117 | 0.107 | 0.092 | 0.091 | 0.109 | 0.103 |
| ESCN | 0.123 | 0.114 | 0.100 | 0.103 | 0.113 | 0.111 |
| GemNet-OC | 0.123 | 0.117 | 0.100 | 0.098 | 0.106 | 0.109 |
| ADSMT | 0.109 | 0.101 | 0.085 | 0.095 | 0.099 | 0.098 |
| JMP | 0.079 | 0.074 | 0.063 | 0.068 | 0.070 | 0.071 |
| ORB-v2 | 0.074 | 0.073 | **0.061** | 0.065 | 0.077 | 0.070 |
| ORB-v3 | 0.081 | 0.083 | 0.065 | 0.069 | 0.076 | 0.075 |
| **CatAI** | **0.071** | **0.069** | 0.063 | **0.053** | **0.063** | **0.064** |

**Supplementary Table 4.** Model performance on FG-GMAE (5-fold experiments).

| Model name | Split 0 | Split 1 | Split 2 | Split 3 | Split 4 | Mean MAE |
| --- | --- | --- | --- | --- | --- | --- |
| CGCNN | 0.110 | 0.111 | 0.111 | 0.118 | 0.115 | 0.113 |
| SchNet | 0.070 | 0.070 | 0.073 | 0.071 | 0.078 | 0.073 |
| DimeNet++ | 0.038 | 0.044 | 0.042 | 0.042 | **0.040** | 0.041 |
| Equiformer | 0.039 | 0.039 | 0.044 | 0.043 | 0.047 | 0.042 |
| ESCN | 0.069 | 0.059 | 0.066 | 0.062 | 0.064 | 0.064 |
| GemNet-OC | 0.048 | 0.054 | 0.054 | 0.053 | 0.057 | 0.053 |
| ADSMT | 0.084 | 0.096 | 0.093 | 0.105 | 0.100 | 0.095 |
| JMP | 0.034 | 0.044 | 0.045 | 0.041 | **0.040** | 0.041 |
| ORB-v2 | 0.037 | 0.042 | 0.042 | 0.046 | 0.046 | 0.042 |
| ORB-v3 | 0.060 | 0.051 | 0.064 | 0.068 | 0.062 | 0.061 |
| **CatAI** | **0.030** | **0.034** | **0.031** | **0.038** | 0.045 | **0.036** |

**Supplementary Table 5.** Model performance on OCD-GMAE (5-fold experiments).

| Model name | Split 0 | Split 1 | Split 2 | Split 3 | Split 4 | Mean MAE |
| --- | --- | --- | --- | --- | --- | --- |
| CGCNN | 0.881 | 1.094 | 0.821 | 0.860 | 0.969 | 0.925 |
| SchNet | 0.979 | 0.885 | 0.740 | 0.806 | 0.741 | 0.830 |
| DimeNet++ | 0.715 | 0.661 | 0.633 | 0.708 | 0.653 | 0.674 |
| Equiformer | 0.818 | 0.690 | 0.652 | 0.805 | 0.757 | 0.744 |
| ESCN | 0.829 | 0.788 | 0.702 | 0.766 | 0.806 | 0.778 |
| GemNet-OC | 0.774 | 0.748 | 0.742 | 0.799 | 0.697 | 0.752 |
| ADSMT | 0.958 | 0.739 | 0.739 | 0.859 | 0.700 | 0.799 |
| JMP | 0.813 | 0.707 | 0.666 | 0.658 | 0.741 | 0.717 |
| ORB-v2 | 0.630 | 0.852 | 0.554 | 0.547 | 0.659 | 0.648 |
| ORB-v3 | **0.580** | 0.672 | **0.530** | 0.587 | 0.801 | 0.634 |
| **CatAI** | 0.607 | **0.521** | 0.568 | **0.551** | **0.619** | **0.573** |

**Supplementary Table 6.** Model performance on Desorption-OC20 (5-fold experiments).

| Model name | Split 0 | Split 1 | Split 2 | Split 3 | Split 4 | Mean MAE |
| --- | --- | --- | --- | --- | --- | --- |
| CGCNN | 0.449 | 0.464 | 0.648 | 0.783 | 0.824 | 0.634 |
| SchNet | 0.481 | 0.555 | 0.599 | 0.697 | 0.841 | 0.634 |
| DimeNet++ | 0.460 | **0.294** | 0.452 | 0.619 | 0.814 | 0.528 |
| Equiformer | 0.652 | 0.456 | 0.657 | 0.871 | 0.818 | 0.691 |
| ESCN | 0.570 | 0.479 | 0.515 | 0.726 | 0.851 | 0.628 |
| GemNet-OC | 0.592 | 0.514 | 0.529 | 0.749 | 0.784 | 0.634 |
| ADSMT | 0.377 | 0.655 | 0.828 | 0.917 | 0.741 | 0.703 |
| JMP | 0.440 | **0.294** | **0.295** | 0.580 | 0.447 | 0.411 |
| ORB-v2 | 0.359 | 0.441 | 0.320 | 0.501 | 0.670 | 0.458 |
| ORB-v3 | 0.319 | 0.522 | 0.381 | 0.503 | 0.819 | 0.509 |
| **CatAI** | **0.295** | 0.386 | 0.318 | **0.480** | **0.372** | **0.370** |

**Supplementary Table 7.** Model performance on Dissociation-OC20 (5-fold experiments).

| Model name | Split 0 | Split 1 | Split 2 | Split 3 | Split 4 | Mean MAE |
| --- | --- | --- | --- | --- | --- | --- |
| CGCNN | 0.863 | 0.635 | 0.813 | 1.137 | 0.672 | 0.824 |
| SchNet | 1.080 | 1.115 | 1.243 | 1.039 | 0.579 | 1.011 |
| DimeNet++ | 0.685 | 0.706 | 0.839 | 0.876 | 0.538 | 0.729 |
| Equiformer | 0.975 | 1.078 | 1.249 | 1.069 | 0.601 | 0.994 |
| ESCN | 0.697 | 0.728 | 0.939 | 1.091 | 0.547 | 0.800 |
| GemNet-OC | 0.733 | 0.710 | 0.830 | 0.970 | 0.556 | 0.760 |
| ADSMT | 0.731 | 0.709 | **0.741** | 0.980 | 0.578 | 0.748 |
| JMP | **0.609** | **0.547** | 0.796 | 0.930 | 0.749 | 0.726 |
| ORB-v2 | 0.592 | 0.707 | 0.821 | 0.971 | 0.592 | 0.737 |
| ORB-v3 | 0.915 | 0.675 | **0.704** | 0.961 | 0.562 | 0.763 |
| **CatAI** | 0.683 | 0.621 | 0.776 | **0.844** | **0.503** | **0.685** |

**Supplementary Table 8.** Model performance on Transfer-OC20 (5-fold experiments).

| Model name | Split 0 | Split 1 | Split 2 | Split 3 | Split 4 | Mean MAE |
| --- | --- | --- | --- | --- | --- | --- |
| CGCNN | 0.688 | 0.702 | 0.596 | 0.761 | 0.559 | 0.661 |
| SchNet | 0.768 | 0.729 | 0.591 | 0.690 | 0.615 | 0.679 |
| DimeNet++ | 0.670 | 0.627 | 0.552 | 0.679 | 0.583 | 0.622 |
| Equiformer | 0.742 | 0.704 | 0.568 | 0.752 | 0.571 | 0.667 |
| ESCN | 0.647 | 0.643 | 0.597 | 0.724 | 0.583 | 0.639 |
| GemNet-OC | 0.652 | 0.632 | 0.552 | 0.676 | 0.590 | 0.620 |
| ADSMT | 0.734 | 0.749 | 0.707 | 0.771 | 0.528 | 0.698 |
| JMP | **0.628** | 0.609 | **0.506** | 0.689 | **0.523** | 0.591 |
| ORB-v2 | 0.638 | 0.647 | 0.511 | 0.618 | 0.546 | 0.592 |
| ORB-v3 | 0.677 | 0.662 | 0.704 | 0.958 | 0.660 | 0.732 |
| **CatAI** | 0.648 | **0.596** | 0.520 | **0.554** | 0.564 | **0.576** |

**Supplementary Table 9.** Comparison between CatAI and the originally reported AdsMT results on Alloy-GMAE. (random split; different split partitions).

| Model name | Mean MAE |
| --- | --- |
| AdsMT w/o transfer learning on OC20-LMAE | 0.143 |
| AdsMT w transfer learning on OC20-LMAE | 0.140 |
| **CatAI** | **0.065** |

**Supplementary Table 10.** Comparison between CatAI and the originally reported AdsMT results on FG-GMAE. (random split; different split partitions).

| Model name | Mean MAE |
| --- | --- |
| AdsMT w/o transfer learning on OC20-LMAE | 0.095 |
| AdsMT w transfer learning on OC20-LMAE | 0.094 |
| **CatAI** | **0.036** |

## Benchmark results of few-shot catalytic property prediction

**Supplementary Table 11.** Model performance on 8-shot Alloy-GMAE (5-fold experiments).

| Model name | Split 0 | Split 1 | Split 2 | Split 3 | Split 4 | Mean MAE |
| --- | --- | --- | --- | --- | --- | --- |
| CGCNN | 1.424 | 1.510 | 1.487 | 1.428 | 1.525 | 1.474 |
| SchNet | 1.506 | 1.405 | 1.518 | 1.458 | 1.469 | 1.471 |
| DimeNet++ | 1.395 | 1.396 | 1.548 | 1.444 | 1.495 | 1.455 |
| Equiformer | 1.548 | 1.435 | 1.602 | 1.596 | 1.525 | 1.541 |
| ESCN | 1.491 | 1.396 | 1.541 | 1.512 | 1.495 | 1.487 |
| GemNet-OC | 1.500 | 1.404 | 1.545 | 1.516 | 1.504 | 1.494 |
| ADSMT | 1.430 | 1.470 | 1.628 | 1.405 | **1.444** | 1.475 |
| **CatAI** | **1.270** | **1.378** | **1.394** | **1.373** | 1.461 | **1.375** |

**Supplementary Table 12.** Model performance on 16-shot Alloy-GMAE (5-fold experiments).

| Model name | Split 0 | Split 1 | Split 2 | Split 3 | Split 4 | Mean MAE |
| --- | --- | --- | --- | --- | --- | --- |
| CGCNN | 1.423 | 1.452 | 1.547 | 1.419 | 1.454 | 1.459 |
| SchNet | 1.540 | 1.419 | 1.650 | 1.406 | 1.586 | 1.520 |
| DimeNet++ | 1.438 | 1.397 | 1.714 | 1.411 | 1.555 | 1.503 |
| Equiformer | 1.554 | 1.438 | 1.780 | 1.539 | 1.608 | 1.584 |
| ESCN | 1.613 | 1.397 | 1.702 | 1.434 | 1.558 | 1.541 |
| GemNet-OC | 1.617 | 1.406 | 1.703 | 1.436 | 1.563 | 1.545 |
| ADSMT | 1.381 | 1.453 | 1.643 | 1.364 | 1.525 | 1.473 |
| **CatAI** | **1.075** | **1.385** | **1.508** | **1.289** | **1.450** | **1.341** |

**Supplementary Table 13.** Model performance on 32-shot Alloy-GMAE (5-fold experiments).

| Model name | Split 0 | Split 1 | Split 2 | Split 3 | Split 4 | Mean MAE |
| --- | --- | --- | --- | --- | --- | --- |
| CGCNN | 1.334 | 1.508 | 1.453 | 1.447 | 1.603 | 1.469 |
| SchNet | 1.348 | 1.395 | 1.432 | 1.381 | 1.531 | 1.417 |
| DimeNet++ | 1.384 | 1.394 | 1.525 | 1.368 | 1.498 | 1.434 |
| Equiformer | 1.452 | 1.514 | 1.584 | 1.516 | 1.592 | 1.532 |
| ESCN | 1.432 | 1.427 | 1.525 | 1.443 | 1.538 | 1.473 |
| GemNet-OC | 1.420 | 1.430 | 1.523 | 1.416 | 1.493 | 1.456 |
| ADSMT | 1.275 | 1.356 | 1.498 | 1.364 | 1.488 | 1.396 |
| **CatAI** | **0.760** | **1.346** | **1.050** | **1.244** | **0.849** | **1.050** |

**Supplementary Table 14.** Model performance on 64-shot Alloy-GMAE (5-fold experiments).

| Model name | Split 0 | Split 1 | Split 2 | Split 3 | Split 4 | Mean MAE |
| --- | --- | --- | --- | --- | --- | --- |
| CGCNN | 1.334 | 1.409 | 1.459 | 1.396 | 1.425 | 1.405 |
| SchNet | 1.283 | 1.280 | 1.415 | 1.353 | 1.479 | 1.362 |
| DimeNet++ | 1.272 | 1.371 | 1.429 | 1.402 | 1.459 | 1.387 |
| Equiformer | 1.338 | 1.251 | 1.383 | 1.408 | 1.485 | 1.373 |
| ESCN | 1.440 | 1.393 | 1.499 | 1.435 | 1.491 | 1.452 |
| GemNet-OC | 1.358 | 1.343 | 1.447 | 1.391 | 1.436 | 1.395 |
| ADSMT | 1.122 | 1.196 | 1.200 | 1.380 | 1.127 | 1.205 |
| **CatAI** | **0.455** | **0.878** | **0.909** | **0.745** | **0.574** | **0.712** |

**Supplementary Table 15.** Model performance on 128-shot Alloy-GMAE (5-fold experiments).

| Model name | Split 0 | Split 1 | Split 2 | Split 3 | Split 4 | Mean MAE |
| --- | --- | --- | --- | --- | --- | --- |
| CGCNN | 1.294 | 1.236 | 1.372 | 1.292 | 1.081 | 1.255 |
| SchNet | 1.148 | 1.128 | 1.149 | 1.159 | 1.259 | 1.169 |
| DimeNet++ | 1.087 | 0.933 | 1.323 | 0.815 | 1.328 | 1.097 |
| Equiformer | 1.153 | 1.141 | 1.129 | 1.113 | 1.252 | 1.158 |
| ESCN | 1.423 | 1.383 | 1.386 | 1.421 | 1.484 | 1.420 |
| GemNet-OC | 1.205 | 1.176 | 1.204 | 1.177 | 1.266 | 1.206 |
| ADSMT | 0.837 | 0.898 | 0.755 | 0.876 | 0.777 | 0.829 |
| **CatAI** | **0.376** | **0.547** | **0.392** | **0.367** | **0.468** | **0.430** |

**Supplementary Table 16.** Model performance on 256-shot Alloy-GMAE (5-fold experiments).

| Model name | Split 0 | Split 1 | Split 2 | Split 3 | Split 4 | Mean MAE |
| --- | --- | --- | --- | --- | --- | --- |
| CGCNN | 0.639 | 0.616 | 0.809 | 0.604 | 0.681 | 0.670 |
| SchNet | 0.857 | 0.883 | 0.849 | 0.817 | 0.933 | 0.868 |
| DimeNet++ | 0.612 | 0.636 | 0.667 | 0.648 | 0.633 | 0.639 |
| Equiformer | 0.704 | 0.826 | 0.779 | 0.705 | 0.826 | 0.768 |
| ESCN | 1.325 | 1.269 | 1.230 | 1.282 | 1.336 | 1.288 |
| GemNet-OC | 0.727 | 0.686 | 0.730 | 0.705 | 0.758 | 0.721 |
| ADSMT | 0.496 | 0.477 | 0.493 | 0.491 | 0.509 | 0.493 |
| **CatAI** | **0.276** | **0.322** | **0.269** | **0.355** | **0.299** | **0.304** |

**Supplementary Table 17.** Model performance on 8-shot FG-GMAE (5-fold experiments).

| Model name | Split 0 | Split 1 | Split 2 | Split 3 | Split 4 | Mean MAE |
| --- | --- | --- | --- | --- | --- | --- |
| CGCNN | 0.544 | 0.486 | 0.606 | 0.487 | **0.471** | 0.519 |
| SchNet | 0.547 | 0.578 | 0.520 | 0.479 | 0.509 | 0.527 |
| DimeNet++ | 0.524 | 0.515 | **0.480** | 0.467 | 0.488 | 0.495 |
| Equiformer | 0.575 | 0.605 | 0.536 | 0.501 | 0.515 | 0.546 |
| ESCN | 0.584 | 0.548 | 0.516 | 0.488 | 0.546 | 0.536 |
| GemNet-OC | 0.580 | 0.540 | 0.510 | 0.481 | 0.536 | 0.530 |
| ADSMT | 0.504 | 0.522 | 0.561 | 0.468 | 0.494 | 0.510 |
| **CatAI** | **0.460** | **0.478** | 0.499 | **0.454** | 0.519 | **0.482** |

**Supplementary Table 18.** Model performance on 16-shot FG-GMAE (5-fold experiments).

| Model name | Split 0 | Split 1 | Split 2 | Split 3 | Split 4 | Mean MAE |
| --- | --- | --- | --- | --- | --- | --- |
| CGCNN | 0.525 | 0.568 | 0.535 | 0.466 | 0.521 | 0.523 |
| SchNet | 0.479 | 0.555 | 0.522 | 0.493 | 0.577 | 0.525 |
| DimeNet++ | 0.472 | 0.529 | **0.432** | 0.468 | 0.508 | 0.482 |
| Equiformer | 0.547 | 0.572 | 0.590 | 0.495 | 0.556 | 0.552 |
| ESCN | 0.576 | 0.535 | 0.511 | 0.489 | 0.558 | 0.534 |
| GemNet-OC | 0.567 | 0.523 | 0.511 | 0.482 | 0.551 | 0.527 |
| ADSMT | 0.431 | 0.545 | 0.501 | 0.434 | 0.488 | 0.480 |
| **CatAI** | **0.374** | **0.502** | 0.488 | **0.396** | **0.431** | **0.438** |

**Supplementary Table 19.** Model performance on 32-shot FG-GMAE (5-fold experiments).

| Model name | Split 0 | Split 1 | Split 2 | Split 3 | Split 4 | Mean MAE |
| --- | --- | --- | --- | --- | --- | --- |
| CGCNN | 0.432 | 0.469 | 0.444 | 0.507 | 0.493 | 0.469 |
| SchNet | 0.371 | 0.490 | 0.491 | 0.532 | 0.473 | 0.471 |
| DimeNet++ | 0.325 | **0.382** | 0.398 | 0.479 | 0.409 | 0.399 |
| Equiformer | 0.386 | 0.565 | 0.489 | 0.508 | 0.476 | 0.485 |
| ESCN | 0.538 | 0.537 | 0.503 | 0.488 | 0.536 | 0.521 |
| GemNet-OC | 0.511 | 0.519 | 0.480 | 0.481 | 0.508 | 0.500 |
| ADSMT | 0.392 | 0.460 | 0.408 | 0.461 | 0.443 | 0.433 |
| **CatAI** | **0.284** | 0.415 | **0.371** | **0.463** | **0.357** | **0.378** |

**Supplementary Table 20.** Model performance on 64-shot FG-GMAE (5-fold experiments).

| Model name | Split 0 | Split 1 | Split 2 | Split 3 | Split 4 | Mean MAE |
| --- | --- | --- | --- | --- | --- | --- |
| CGCNN | 0.441 | 0.451 | 0.415 | 0.451 | 0.417 | 0.435 |
| SchNet | 0.372 | 0.486 | 0.385 | 0.435 | 0.360 | 0.408 |
| DimeNet++ | 0.397 | 0.332 | 0.281 | **0.384** | **0.296** | 0.338 |
| Equiformer | 0.440 | 0.454 | 0.360 | 0.458 | 0.421 | 0.426 |
| ESCN | 0.548 | 0.534 | 0.508 | 0.487 | 0.534 | 0.522 |
| GemNet-OC | 0.519 | 0.508 | 0.475 | 0.461 | 0.491 | 0.491 |
| ADSMT | 0.381 | 0.350 | 0.380 | 0.394 | 0.374 | 0.376 |
| **CatAI** | **0.238** | **0.286** | **0.248** | 0.428 | 0.383 | **0.316** |

**Supplementary Table 21.** Model performance on 128-shot FG-GMAE (5-fold experiments).

| Model name | Split 0 | Split 1 | Split 2 | Split 3 | Split 4 | Mean MAE |
| --- | --- | --- | --- | --- | --- | --- |
| CGCNN | 0.370 | 0.423 | 0.413 | 0.422 | 0.423 | 0.410 |
| SchNet | 0.240 | 0.294 | 0.313 | 0.266 | 0.298 | 0.282 |
| DimeNet++ | 0.190 | 0.226 | **0.202** | **0.194** | **0.217** | 0.206 |
| Equiformer | 0.216 | 0.296 | 0.298 | 0.236 | 0.291 | 0.267 |
| ESCN | 0.516 | 0.535 | 0.487 | 0.476 | 0.514 | 0.505 |
| GemNet-OC | 0.449 | 0.489 | 0.435 | 0.422 | 0.447 | 0.449 |
| ADSMT | 0.327 | 0.328 | 0.357 | 0.303 | 0.341 | 0.331 |
| **CatAI** | **0.167** | **0.205** | 0.209 | 0.187 | 0.220 | **0.197** |

**Supplementary Table 22.** Model performance on 256-shot FG-GMAE (5-fold experiments).

| Model name | Split 0 | Split 1 | Split 2 | Split 3 | Split 4 | Mean MAE |
| --- | --- | --- | --- | --- | --- | --- |
| CGCNN | 0.211 | 0.382 | 0.240 | 0.218 | 0.264 | 0.263 |
| SchNet | 0.200 | 0.231 | 0.208 | 0.218 | 0.250 | 0.221 |
| DimeNet++ | 0.124 | **0.137** | 0.142 | 0.142 | **0.140** | 0.137 |
| Equiformer | 0.159 | 0.146 | 0.191 | 0.186 | 0.185 | 0.173 |
| ESCN | 0.406 | 0.426 | 0.401 | 0.384 | 0.405 | 0.404 |
| GemNet-OC | 0.341 | 0.396 | 0.342 | 0.335 | 0.365 | 0.356 |
| ADSMT | 0.227 | 0.210 | 0.212 | 0.221 | 0.289 | 0.232 |
| **CatAI** | **0.110** | 0.139 | **0.112** | **0.134** | 0.161 | **0.131** |

## Benchmark results of active learning minimal adsorption energy discovery

**Supplementary Fig 3.** Per-round Active-learning average performance for adsorption-energy minimization. Mean optimization curves over 40 independent repeats for ten active-learning rounds targeting minimal *CH2 (top) and *O (bottom) adsorption energies. Each panel reports the round-wise average of the best value identified so far and the corresponding Top-3 hit rate.


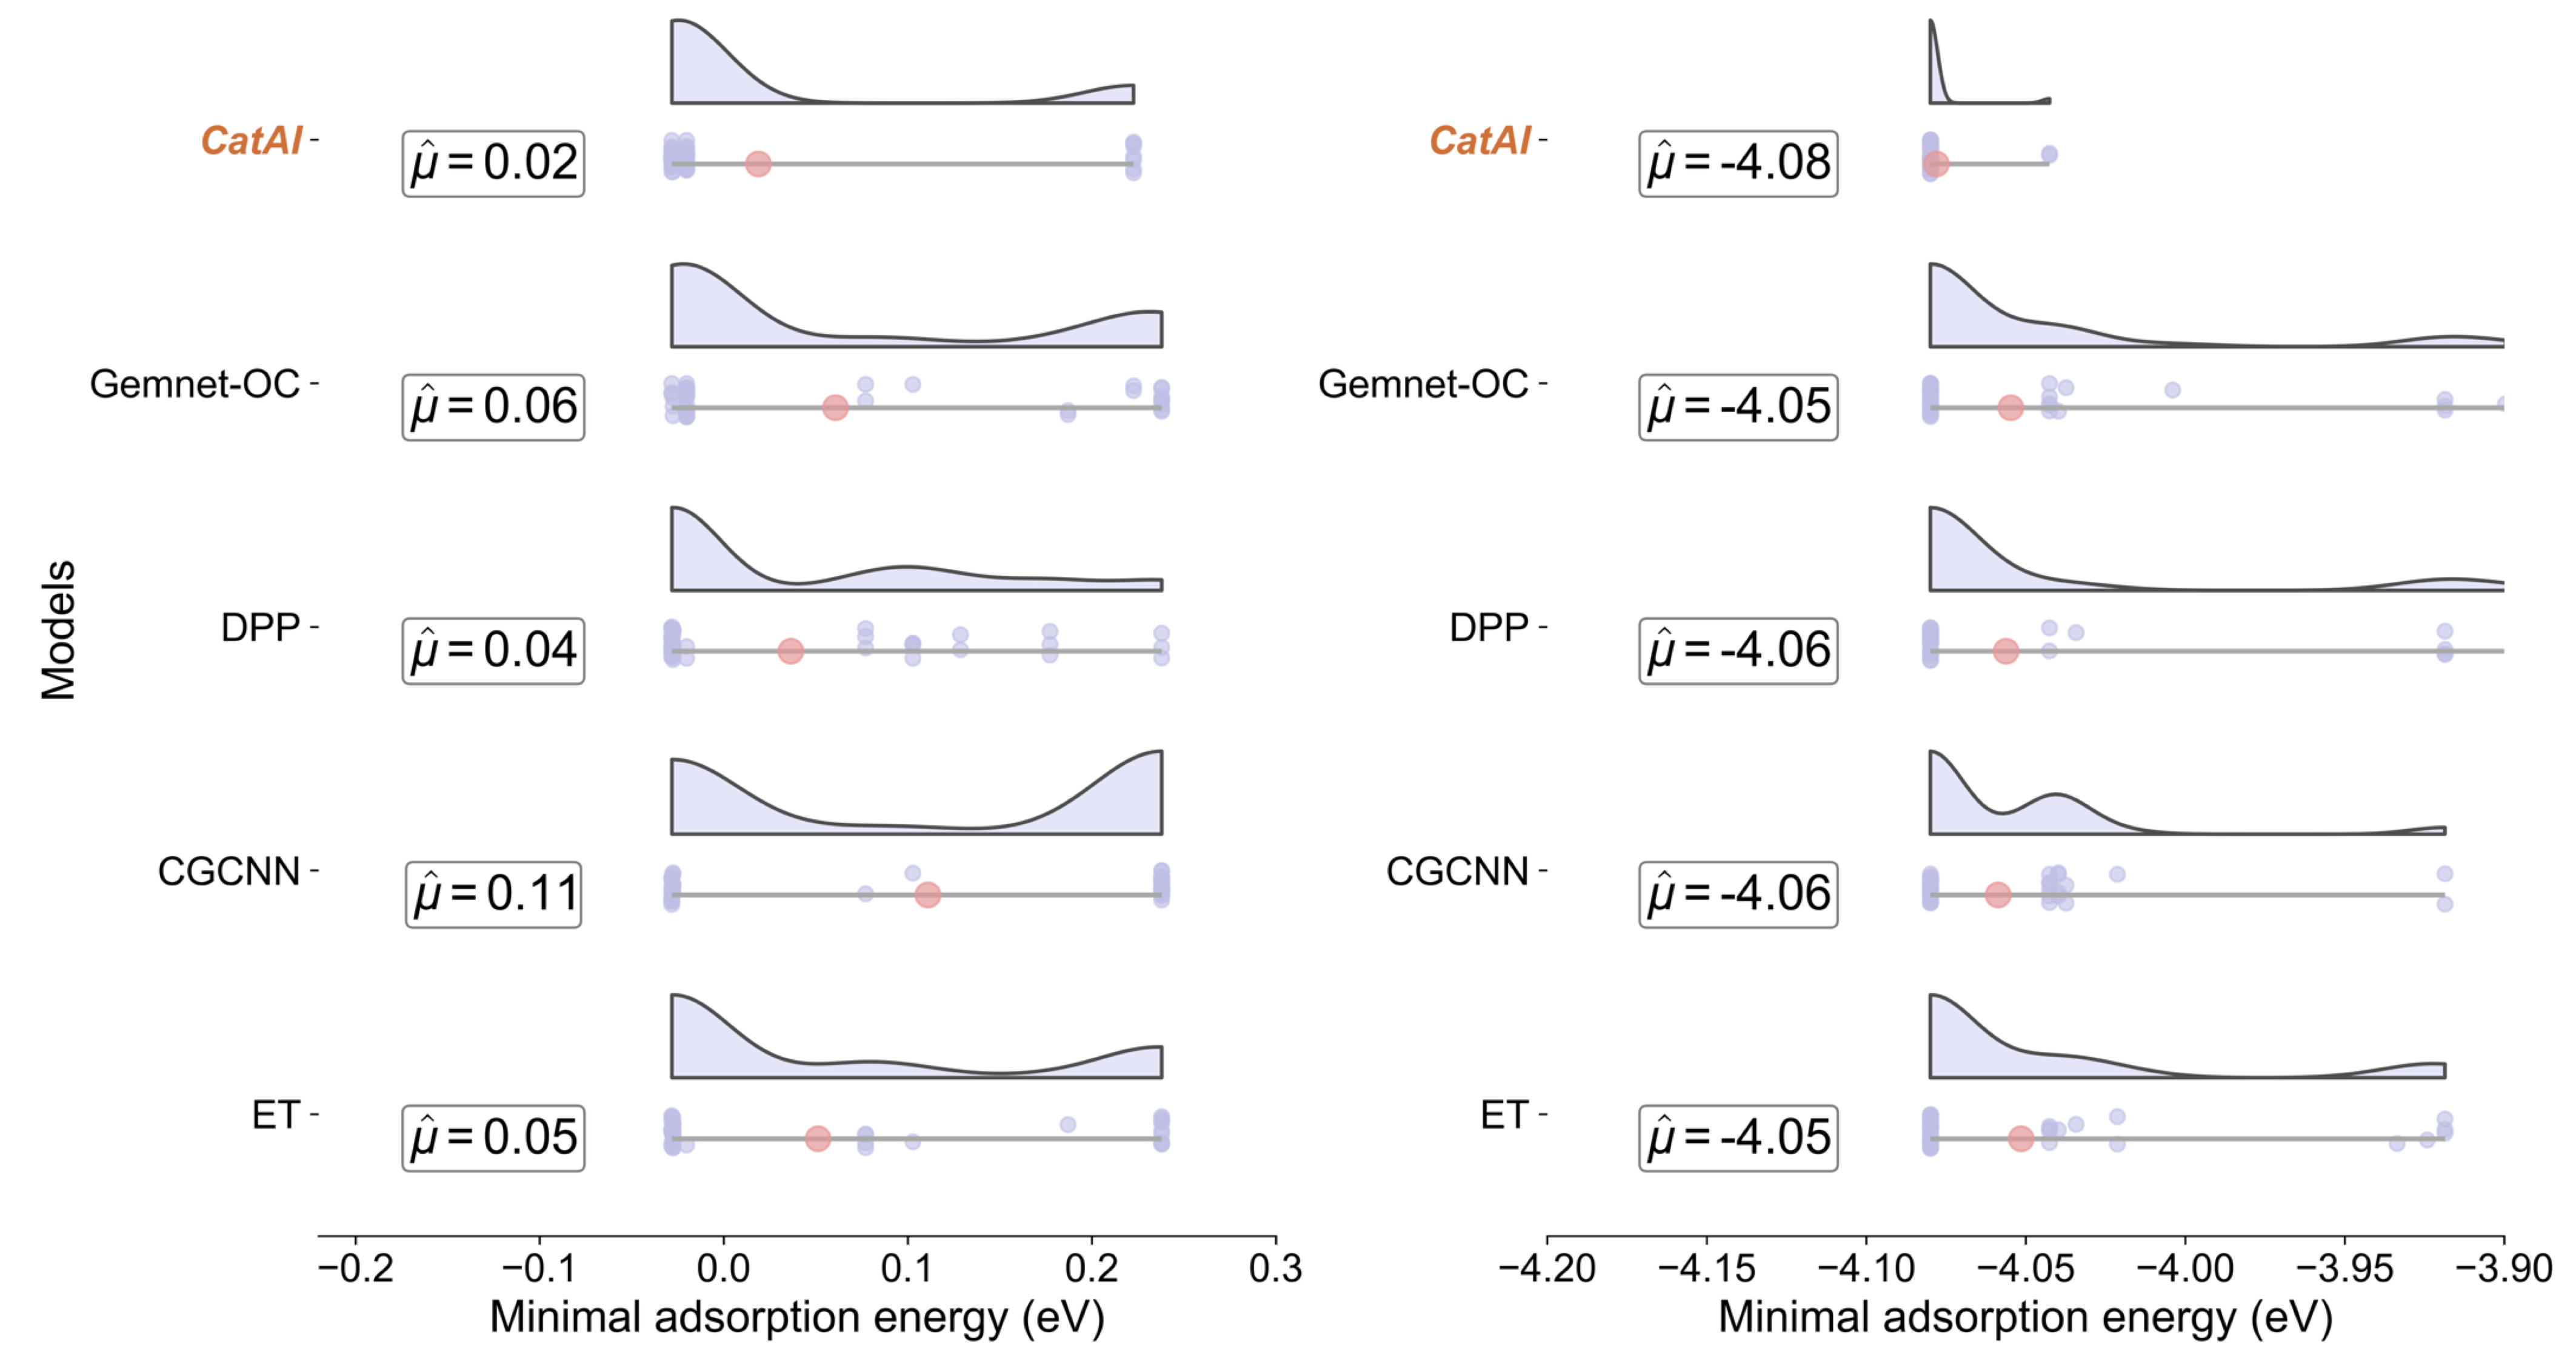


**Supplementary Fig 4.** Active-learning performance for identifying catalysts with minimal adsorption energies. The points along each horizontal line denote the minimum adsorption energies identified in individual runs, and the collection of 40 such values defines the corresponding empirical distribution.

**Supplementary Fig 5.** Active-learning performance for adsorption-energy minimization. Per-round mean minimal validation loss for *CH2 (left) and *O (right) adsorption benchmarks, illustrating the rate at which different models improve under active learning.

## Benchmark results of domain catalytic property prediction

**Supplementary Table 23.** Model performance on thermocatalysis ethylene binding energy (5-fold experiments).

| Model name | Split 0 | Split 1 | Split 2 | Split 3 | Split 4 | Mean MAE |
| --- | --- | --- | --- | --- | --- | --- |
| CGCNN | 0.338 | 0.361 | 0.315 | 0.551 | 0.329 | 0.379 |
| SchNet | 0.440 | 0.353 | 0.321 | 0.333 | 0.277 | 0.345 |
| DimeNet++ | 0.413 | 0.264 | 0.424 | **0.331** | 0.309 | 0.348 |
| Equiformer | 0.362 | 0.291 | 0.344 | 0.383 | 0.319 | 0.340 |
| ESCN | 0.440 | 0.353 | 0.321 | 0.333 | 0.277 | 0.345 |
| GemNet-OC | 0.442 | 0.330 | 0.317 | 0.340 | 0.268 | 0.339 |
| ADSMT | 0.367 | 0.263 | 0.466 | 0.526 | **0.145** | 0.353 |
| JMP | 0.355 | 0.300 | 0.201 | 0.250 | 0.536 | 0.328 |
| ORB-v2 | 0.380 | 0.250 | 0.400 | 0.370 | 0.260 | 0.332 |
| ORB-v3 | 0.340 | **0.170** | 0.350 | 0.380 | 0.320 | 0.312 |
| **CatAI** | **0.322** | 0.259 | **0.306** | 0.357 | 0.232 | **0.295** |

**Supplementary Table 24.** Model performance on photocatalysis electron affinity energy (5-fold experiments).

| Model name | Split 0 | Split 1 | Split 2 | Split 3 | Split 4 | Mean MAE |
| --- | --- | --- | --- | --- | --- | --- |
| CGCNN | 0.008 | 0.027 | 0.010 | 0.008 | 0.008 | 0.012 |
| SchNet | 0.028 | 0.030 | 0.026 | 0.021 | 0.023 | 0.026 |
| DimeNet++ | 0.005 | 0.024 | **0.004** | 0.004 | 0.006 | 0.009 |
| Equiformer | **0.004** | 0.023 | 0.005 | **0.003** | 0.004 | **0.008** |
| ESCN | 0.051 | 0.065 | 0.047 | 0.041 | 0.040 | 0.049 |
| GemNet-OC | 0.016 | 0.031 | 0.015 | 0.012 | 0.014 | 0.017 |
| ADSMT | 0.020 | 0.034 | 0.016 | 0.017 | 0.020 | 0.021 |
| JMP | 0.024 | 0.031 | 0.053 | 0.045 | 0.029 | 0.036 |
| ORB-v2 | 0.029 | 0.041 | 0.026 | 0.029 | 0.027 | 0.030 |
| ORB-v3 | 0.034 | 0.048 | 0.026 | 0.025 | 0.029 | 0.033 |
| **CatAI** | 0.005 | **0.004** | 0.024 | 0.007 | **0.004** | 0.009 |

**Supplementary Table 25.** Model performance on electrocatalysis OH* adsorption energy (5-fold experiments).

| Model name | Split 0 | Split 1 | Split 2 | Split 3 | Split 4 | Mean MAE |
| --- | --- | --- | --- | --- | --- | --- |
| CGCNN | 0.519 | 0.452 | 0.495 | 0.578 | 0.457 | 0.500 |
| SchNet | 0.507 | 0.707 | 0.519 | 0.635 | 0.426 | 0.559 |
| DimeNet++ | 0.451 | 0.467 | 0.578 | 0.625 | 0.452 | 0.515 |
| Equiformer | 0.474 | **0.366** | 0.547 | 0.615 | 0.424 | 0.485 |
| ESCN | 0.980 | 0.893 | 0.952 | 1.108 | 1.113 | 1.009 |
| GemNet-OC | 0.680 | 0.900 | 0.704 | 0.844 | 1.027 | 0.831 |
| ADSMT | 0.508 | 0.374 | 0.520 | 0.601 | 0.439 | 0.488 |
| JMP | 0.410 | 0.553 | **0.467** | 0.634 | 0.575 | 0.528 |
| ORB-v2 | 0.431 | 0.382 | 0.493 | 0.667 | **0.361** | 0.467 |
| ORB-v3 | 0.447 | 0.579 | 0.624 | 0.520 | 0.523 | 0.538 |
| **CatAI** | **0.346** | 0.525 | 0.477 | **0.525** | 0.444 | **0.463** |

**Supplementary Table 26.** Model performance on electrocatalysis O* adsorption energy (5-fold experiments).

| Model name | Split 0 | Split 1 | Split 2 | Split 3 | Split 4 | Mean MAE |
| --- | --- | --- | --- | --- | --- | --- |
| CGCNN | 0.500 | 0.612 | 0.512 | 0.481 | 0.500 | 0.521 |
| SchNet | 0.669 | 0.891 | 0.666 | 0.651 | 0.565 | 0.688 |
| DimeNet++ | 0.561 | 0.678 | 0.575 | 0.646 | 0.585 | 0.609 |
| Equiformer | 0.433 | 0.615 | **0.426** | **0.459** | 0.487 | **0.484** |
| ESCN | 1.698 | 1.638 | 1.361 | 1.180 | 1.621 | 1.500 |
| GemNet-OC | 1.072 | 1.175 | 1.435 | 1.258 | 0.931 | 1.174 |
| ADSMT | 0.435 | 0.529 | 0.453 | 0.490 | 0.579 | 0.497 |
| JMP | 0.684 | 0.673 | 0.832 | 0.704 | 0.373 | 0.653 |
| ORB-v2 | **0.383** | 0.539 | 0.682 | 0.474 | 0.507 | 0.517 |
| ORB-v3 | 0.430 | **0.494** | 0.509 | 0.738 | 0.424 | 0.519 |
| **CatAI** | 0.438 | 0.512 | 0.690 | 0.493 | **0.310** | 0.489 |

## Ablation study of module fusion mechanism

**Supplementary Table 27.** Ablation study of module fusion mechanism on Alloy-GMAE (5-fold experiments).

| Model name | Split 0 | Split 1 | Split 2 | Split 3 | Split 4 | Mean MAE |
| --- | --- | --- | --- | --- | --- | --- |
| MP formation energy | 0.077 | 0.072 | **0.062** | 0.066 | 0.073 | 0.070 |
| MP band gap | 0.107 | 0.093 | 0.086 | 0.089 | 0.094 | 0.094 |
| Single atom catalyst adsorption energy | 0.093 | 0.091 | 0.076 | 0.080 | 0.090 | 0.086 |
| Random Select 1 | 0.096 | 0.091 | 0.081 | 0.086 | 0.089 | 0.089 |
| Random Select 2 | 0.104 | 0.089 | 0.086 | 0.085 | 0.092 | 0.091 |
| Multi-task | 0.079 | 0.074 | 0.063 | 0.068 | 0.070 | 0.071 |
| **CatAI** | **0.071** | **0.069** | 0.063 | **0.053** | **0.063** | **0.064** |

**Supplementary Table 28.** Ablation study of module fusion mechanism on FG-GMAE (5-fold experiments).

| Model name | Split 0 | Split 1 | Split 2 | Split 3 | Split 4 | Mean MAE |
| --- | --- | --- | --- | --- | --- | --- |
| MP formation energy | 0.044 | 0.041 | 0.043 | 0.043 | 0.048 | 0.044 |
| MP band gap | 0.042 | 0.047 | 0.045 | 0.047 | 0.051 | 0.046 |
| Single atom catalyst adsorption energy | 0.044 | 0.050 | 0.051 | 0.047 | 0.055 | 0.050 |
| Random Select 1 | 0.044 | 0.043 | 0.047 | 0.049 | 0.052 | 0.047 |
| Random Select 2 | 0.040 | 0.041 | 0.053 | 0.045 | 0.057 | 0.047 |
| Multi-task | 0.034 | 0.044 | 0.045 | 0.041 | **0.040** | 0.041 |
| **CatAI** | **0.030** | **0.034** | **0.031** | **0.038** | 0.045 | **0.036** |

**Supplementary Table 29.** Ablation study of module fusion mechanism on OCD-GMAE (5-fold experiments).

| Model name | Split 0 | Split 1 | Split 2 | Split 3 | Split 4 | Mean MAE |
| --- | --- | --- | --- | --- | --- | --- |
| MP formation energy | 0.701 | 0.616 | 0.734 | 0.658 | 0.748 | 0.691 |
| MP band gap | 0.621 | 0.666 | 0.767 | 0.562 | 0.784 | 0.680 |
| Single atom catalyst adsorption energy | 0.749 | 0.770 | 0.654 | 0.706 | 0.870 | 0.750 |
| Random Select 1 | 0.682 | 0.713 | **0.506** | 0.657 | 0.677 | 0.647 |
| Random Select 2 | 0.608 | 0.684 | 0.597 | 0.657 | **0.573** | 0.624 |
| Multi-task | 0.813 | 0.707 | 0.666 | 0.658 | 0.741 | 0.717 |
| **CatAI** | **0.607** | **0.521** | 0.568 | **0.551** | 0.619 | **0.573** |

**Supplementary Table 30.** Ablation study of module fusion mechanism on Desorption-OC20 (5-fold experiments).

| Model name | Split 0 | Split 1 | Split 2 | Split 3 | Split 4 | Mean MAE |
| --- | --- | --- | --- | --- | --- | --- |
| MP formation energy | 0.413 | 0.474 | 0.325 | 0.477 | 0.498 | 0.437 |
| MP band gap | 0.418 | 0.404 | 0.488 | 0.660 | 0.870 | 0.568 |
| Single atom catalyst adsorption energy | 0.417 | 0.448 | 0.469 | 0.636 | 0.860 | 0.566 |
| Random Select 1 | **0.287** | 0.346 | 0.442 | 0.563 | 0.485 | 0.425 |
| Random Select 2 | 0.335 | 0.336 | 0.349 | **0.442** | 0.657 | 0.424 |
| Multi-task | 0.440 | **0.294** | **0.295** | 0.580 | 0.447 | 0.411 |
| **CatAI** | 0.295 | 0.386 | 0.318 | 0.480 | **0.372** | **0.370** |

**Supplementary Table 31.** Ablation study of module fusion mechanism on Dissociation-OC20 (5-fold experiments).

| Model name | Split 0 | Split 1 | Split 2 | Split 3 | Split 4 | Mean MAE |
| --- | --- | --- | --- | --- | --- | --- |
| MP formation energy | 0.778 | 0.678 | 0.767 | 0.880 | 0.619 | 0.744 |
| MP band gap | **0.629** | 0.620 | 0.852 | 0.907 | 0.547 | 0.711 |
| Single atom catalyst adsorption energy | 0.635 | 0.696 | 0.852 | **0.843** | 0.583 | 0.722 |
| Random Select 1 | 0.678 | **0.605** | **0.717** | 0.920 | 0.514 | 0.687 |
| Random Select 2 | 0.703 | 0.613 | 0.725 | 0.876 | 0.552 | 0.694 |
| Multi-task | **0.609** | **0.547** | 0.796 | 0.930 | 0.749 | 0.726 |
| **CatAI** | 0.683 | 0.621 | 0.776 | 0.844 | **0.503** | **0.685** |

**Supplementary Table 32.** Ablation study of module fusion mechanism on Transfer-OC20 (5-fold experiments).

| Model name | Split 0 | Split 1 | Split 2 | Split 3 | Split 4 | Mean MAE |
| --- | --- | --- | --- | --- | --- | --- |
| MP formation energy | 0.613 | **0.577** | 0.521 | 0.634 | 0.569 | 0.583 |
| MP band gap | 0.636 | 0.662 | 0.540 | 0.697 | **0.485** | 0.604 |
| Single atom catalyst adsorption energy | **0.577** | 0.774 | **0.515** | 0.616 | 0.562 | 0.609 |
| Random Select 1 | 0.677 | 0.630 | 0.522 | 0.652 | 0.543 | 0.605 |
| Random Select 2 | 0.652 | 0.637 | 0.539 | 0.789 | 0.571 | 0.638 |
| Multi-task | 0.628 | 0.609 | **0.506** | 0.689 | 0.523 | 0.591 |
| **CatAI** | 0.648 | 0.596 | 0.520 | **0.554** | 0.564 | **0.576** |

# Large-Scale Virtual Screening for Polyolefin Elastomer Catalysts

This section documents the large-scale virtual screening campaign for polyolefin elastomer (POE) catalysts. The workflow follows the standardized discovery pipeline introduced in the main text: design-space definition via literature-derived priors (**Section 3.1**), data initialization through a coupled DFT–KMC computational workflow (**Section 3.2**), CatAI-driven screening of 7,097 candidates generated by automated structure enumeration (**Sections 3.3–3.4**), and experimental synthesis of the top-ranked catalysts (**Sections 3.5**).

## Design space definition by literature mining


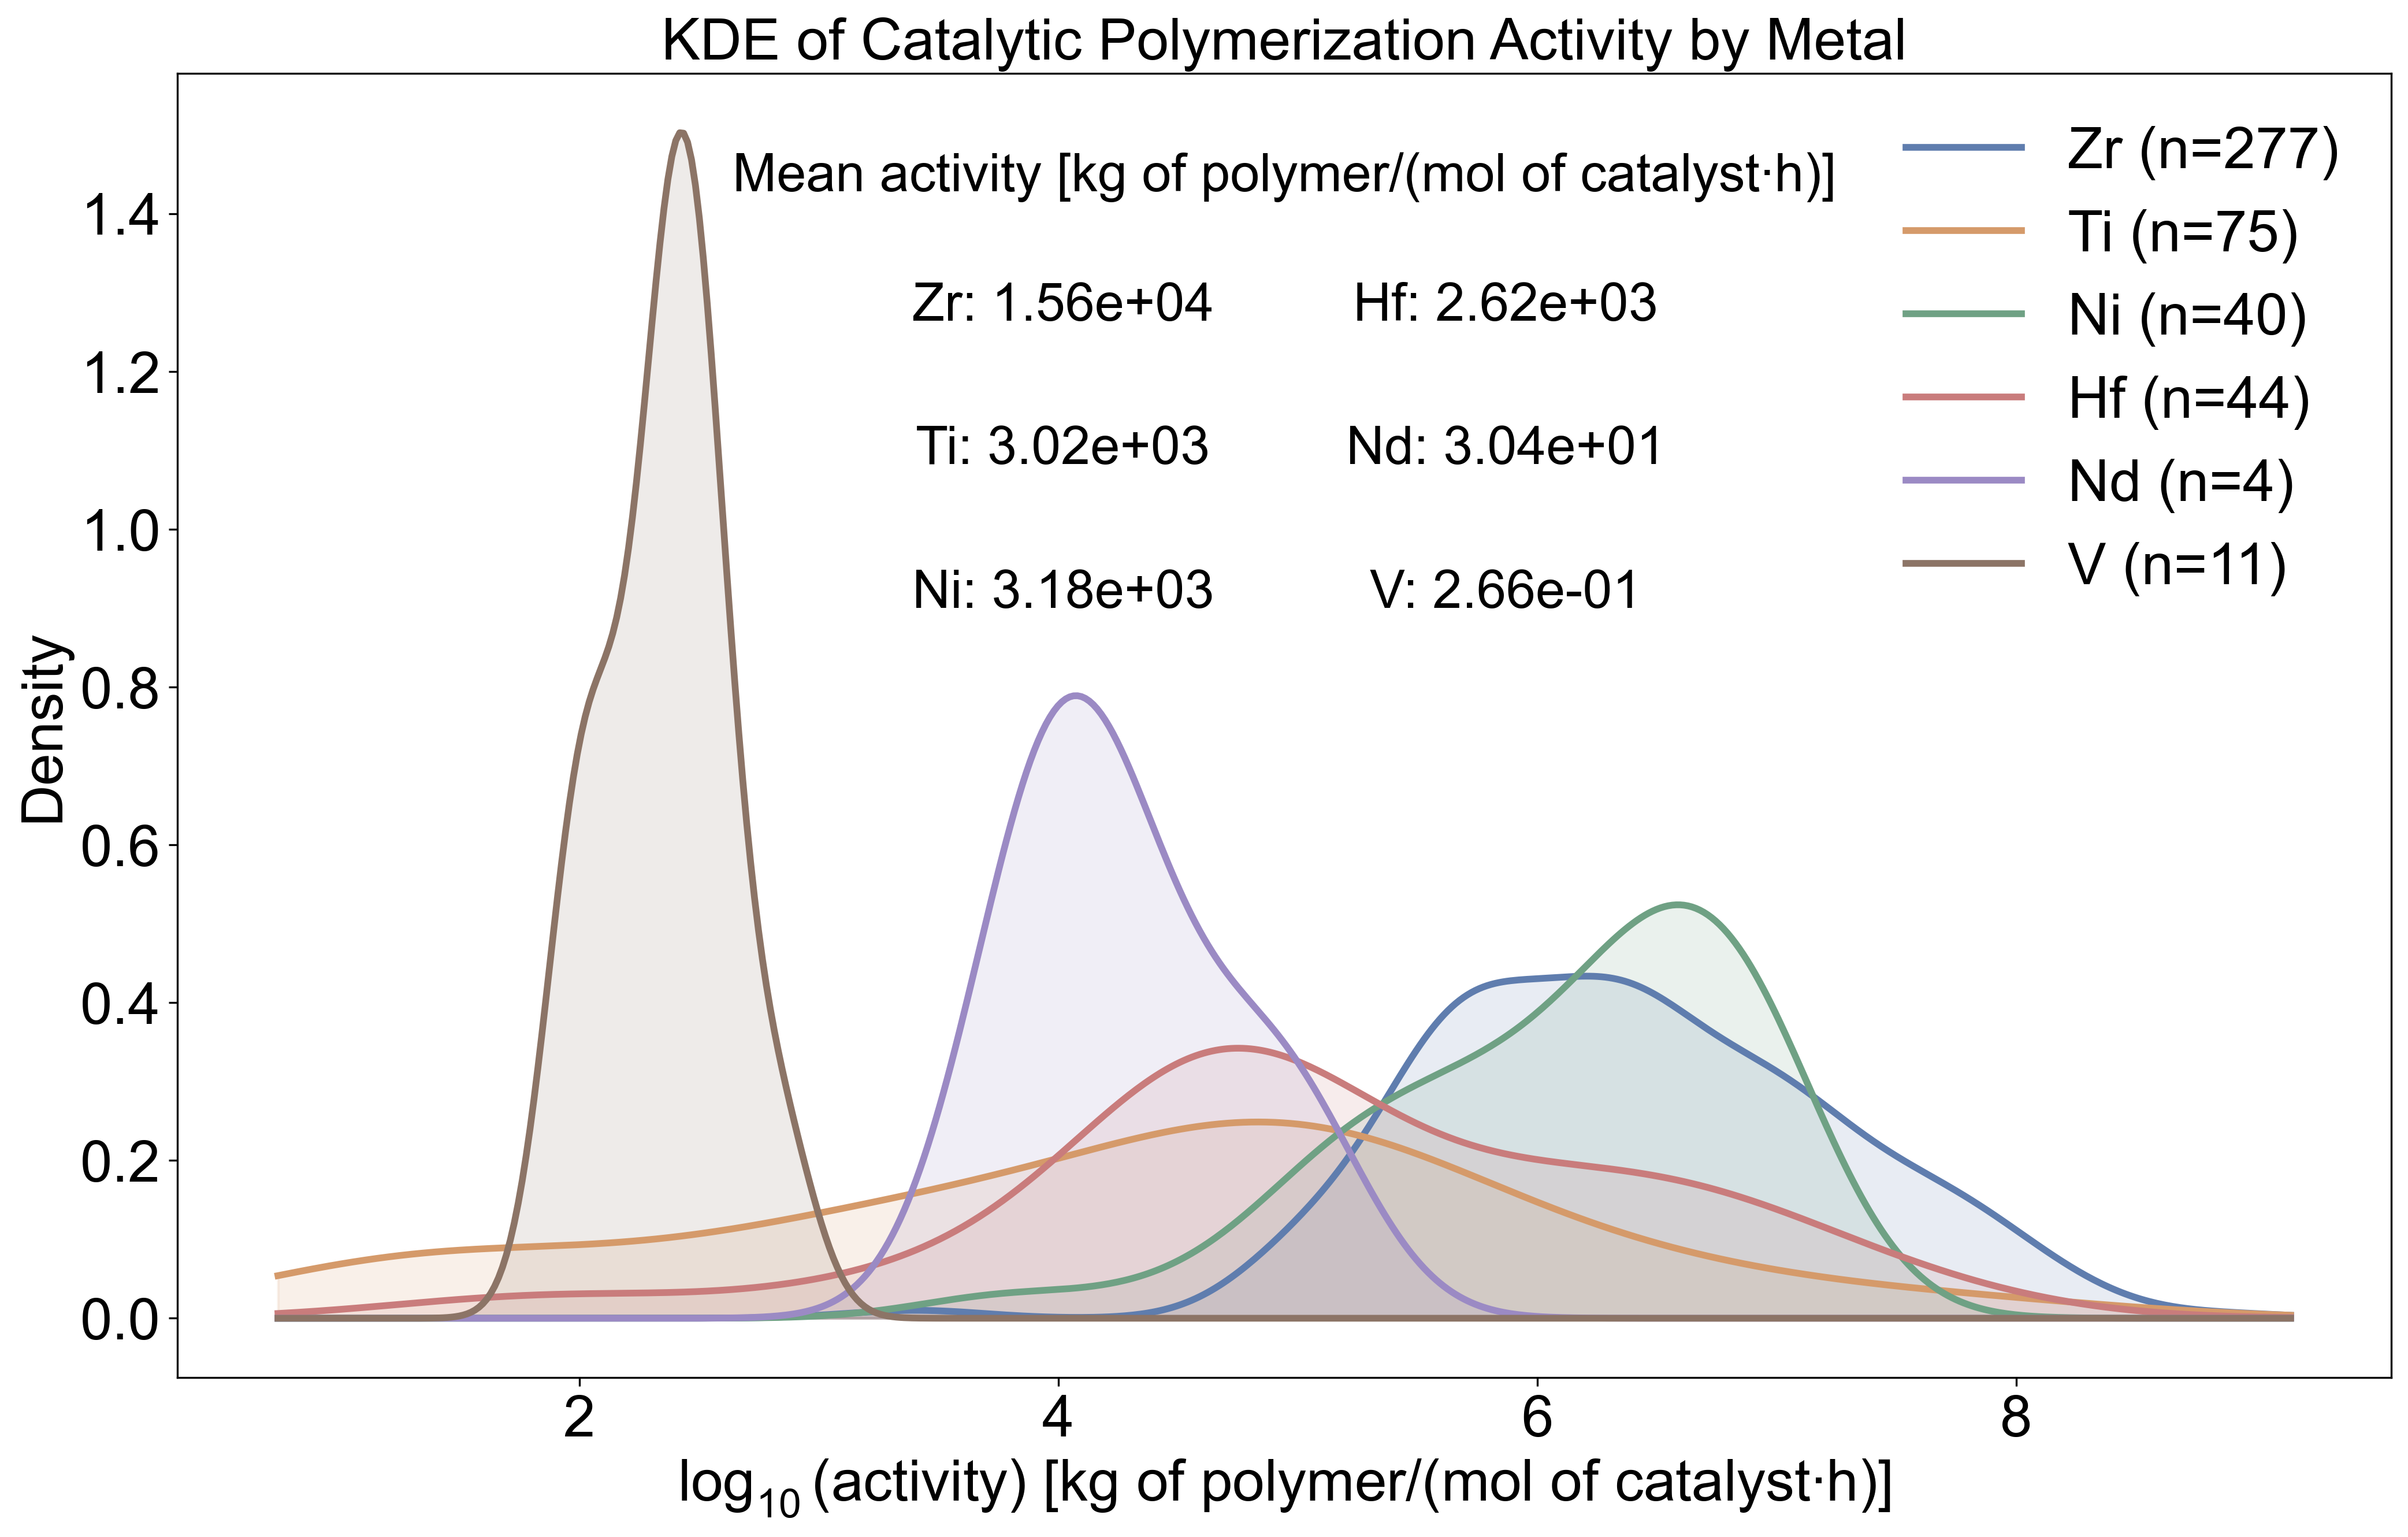


**Supplementary Fig 6.** Literature-derived activity distribution of metallocene catalysts by metal center.

We performed AI-assisted literature mining using a multimodal large language model (MLLM) agent to enable high-throughput screening and structured extraction of polyolefin catalyst information, following the agent-based knowledge distillation framework. The workflow comprised three stages. First, a two-stage pre-filtering pipeline was applied to a corpus of 6,381 literature records: keyword scoring with a domain-specific lexicon (e.g., metallocene, Ziegler–Natta, catalyst activity, kg polymer/mol·h) selected a candidate pool, which was subsequently reranked by cosine similarity of SentenceTransformer embeddings against a polymerization-activity-focused query, yielding a prioritized set of 2,500 manuscripts. Second, for each article passing this filter, the MLLM agent parsed the full-text markdown and embedded figures using a structured prompt (POE-CatalystSlim), extracting a minimal knowledge graph comprising catalyst nodes—each annotated with a canonical SMILES string—and polymerization testing nodes recording the measured catalyst activity, linked by tested_in edges. Third, the structured graph outputs were deterministically linearized into a tabular CSV format without additional LLM calls. After deduplication and unit normalization, this pipeline yielded 451 unique catalyst–activity entries with canonical SMILES annotations across 127 source papers.

Because reaction conditions (temperature, pressure, cocatalyst loading) were not harmonized at this stage, these records were not used for direct activity benchmarking but rather served to delineate the accessible design space of catalytically relevant center metals and ligand scaffolds.

To further refine the generative target space, we performed a manual expert evaluation of the mined catalyst set to determine the most appropriate center metal for large-scale exploration. Among the metals represented in the literature-derived graph, zirconium was selected as the core metal for subsequent design because it offered the best overall combination of industrial relevance, mechanistic maturity, and structural tunability. In particular, Zr-based olefin polymerization catalysts are supported by a broad and chemically diverse literature, are compatible with a wide range of ligand frameworks, and have repeatedly demonstrated their utility in ethylene/α-olefin copolymerization systems closely related to POE synthesis. Subsequent large-scale generation was thus carried out in a Zr-center design space, where structural diversity was introduced primarily through systematic variation of ligand architectures.

## Computational workflow


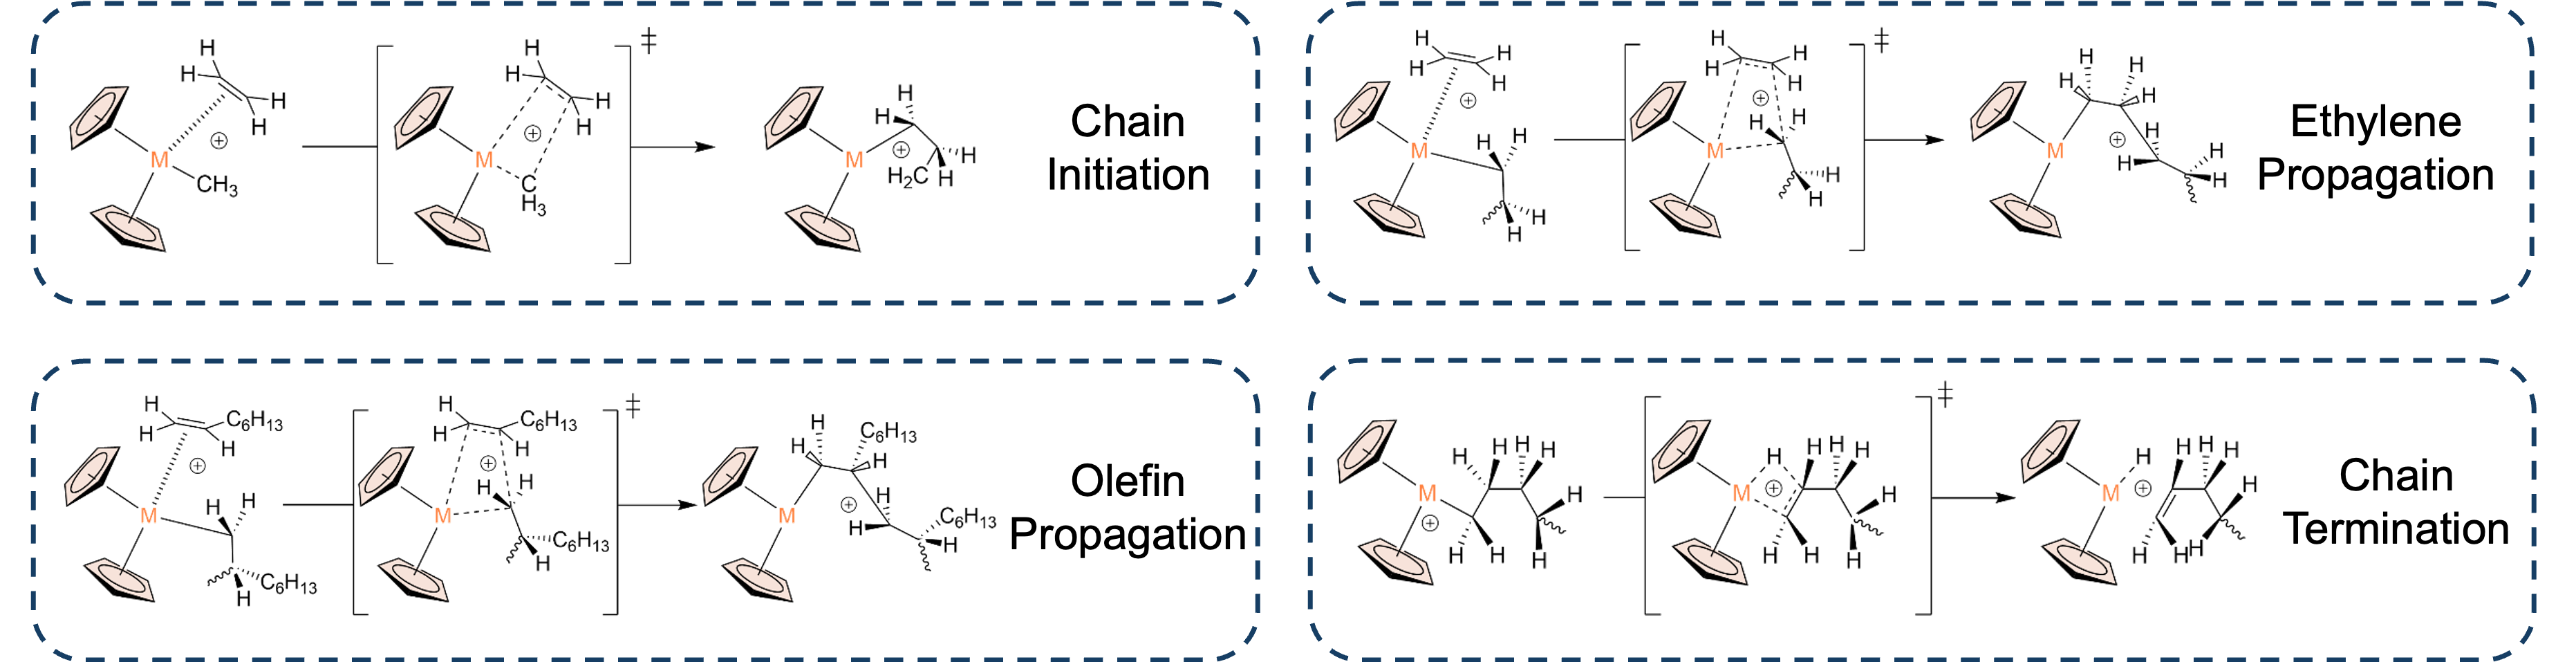


**Supplementary Fig** **7**. Catalytic mechanisms for ethylene/1-octene copolymerization to POE.

In this work, we established an automated computational workflow for high-throughput density functional theory (DFT) calculations. A self-developed high-throughput structure generation script was employed to automatically construct a large number of candidate intermediates and transition-state geometries based on predefined catalyst frameworks and monomer identities. These initial configurations were designed to be geometrically close to their final optimized structures, requiring only minimal structural relaxation prior to DFT refinement. This strategy substantially reduced the time cost associated with manual model construction and pre-optimization.

All identified intermediates and transition states were subjected to systematic geometry optimizations and single-point energy calculations. Thermal corrections were further included to obtain the Gibbs free energy change (ΔG) and the activation free energy (ΔG‡) for each elementary step. The corresponding rate constants (k) were derived using the Eyring equation, enabling direct comparison across different catalytic systems and reaction pathways at the same temperature:

where () is the Boltzmann constant, () is the Planck constant, () is the gas constant, and (T) is the absolute temperature.

Kinetic Monte Carlo (KMC) simulations

The elementary-step rate constants obtained from DFT calculations were subsequently incorporated into a kinetic Monte Carlo (KMC) framework to reconstruct the discrete time evolution of the polymerization process. At each simulation step, the probability of selecting a given event is proportional to its rate constant:

The corresponding time increment (()) was determined from a random number () according to:

By iteratively executing the cycle of “event selection–execution–time update”, the KMC model enables explicit tracking of chain propagation, chain transfer, and chain termination processes at both single-chain and multi-chain levels. After long-time, multi-chain simulations, polymer ensembles with different chain lengths and microstructural features were collected, from which the number-average molecular weight (), weight-average molecular weight (), and dispersity index () were computed:

In addition, the simulations quantified insertion events of ethylene and comonomers (for example, 1-octene), allowing prediction of comonomer incorporation ratios, sequence distribution along the polymer chain, and chain-end unsaturation. This provides an interpretable mapping from microscopic mechanistic pathways to macroscopic experimentally accessible polymer characterization parameters.

**Supplementary Fig 8.** Energy profiles for the elementary steps catalyzed by **Cat 2**.

**Supplementary Fig 9.** Energy profiles for the elementary steps catalyzed by **CPP-Zr**.

## Automated catalyst generation

In this study, we employed our in-house automated builder, ComplexGen, to construct chemically plausible starting geometries for Zr-based organometallic catalysts featuring a metallocene-like (ferrocene-inspired) scaffold. Given a prescribed coordination geometry at the metal center and ligand specifications, ComplexGen assembles candidate complexes across diverse binding patterns, spanning mono- and bidentate coordination as well as σ- and π-interactions.

ComplexGen explores the configurational space by systematically optimising ligand conformers and their placement around the Zr center, with simultaneous refinement of key geometric parameters (bond lengths, bond angles and inter-ligand separations). Each candidate is evaluated using chemically motivated criteria—including minimum ligand–ligand distances, acceptable Zr–donor bond lengths and target coordination angles—and the search proceeds for a fixed number of iterations before returning the highest-ranked structure. For more details and source codes of ComplexGen, please refer to its GitHub repository: (https://github.com/Long1Corn/Complex_Gen)

Using this workflow, we generated reactant, transition-state and product structures in a unified and consistent manner. The resulting geometries were subsequently subjected to DFT optimization to obtain the final stationary points used throughout this work.

**Supplementary Table 33.** Visualization of automated generated structures.

| **Ligands** | **Reactants** | **Transition states** | **Products** |
| --- | --- | --- | --- |
|  | 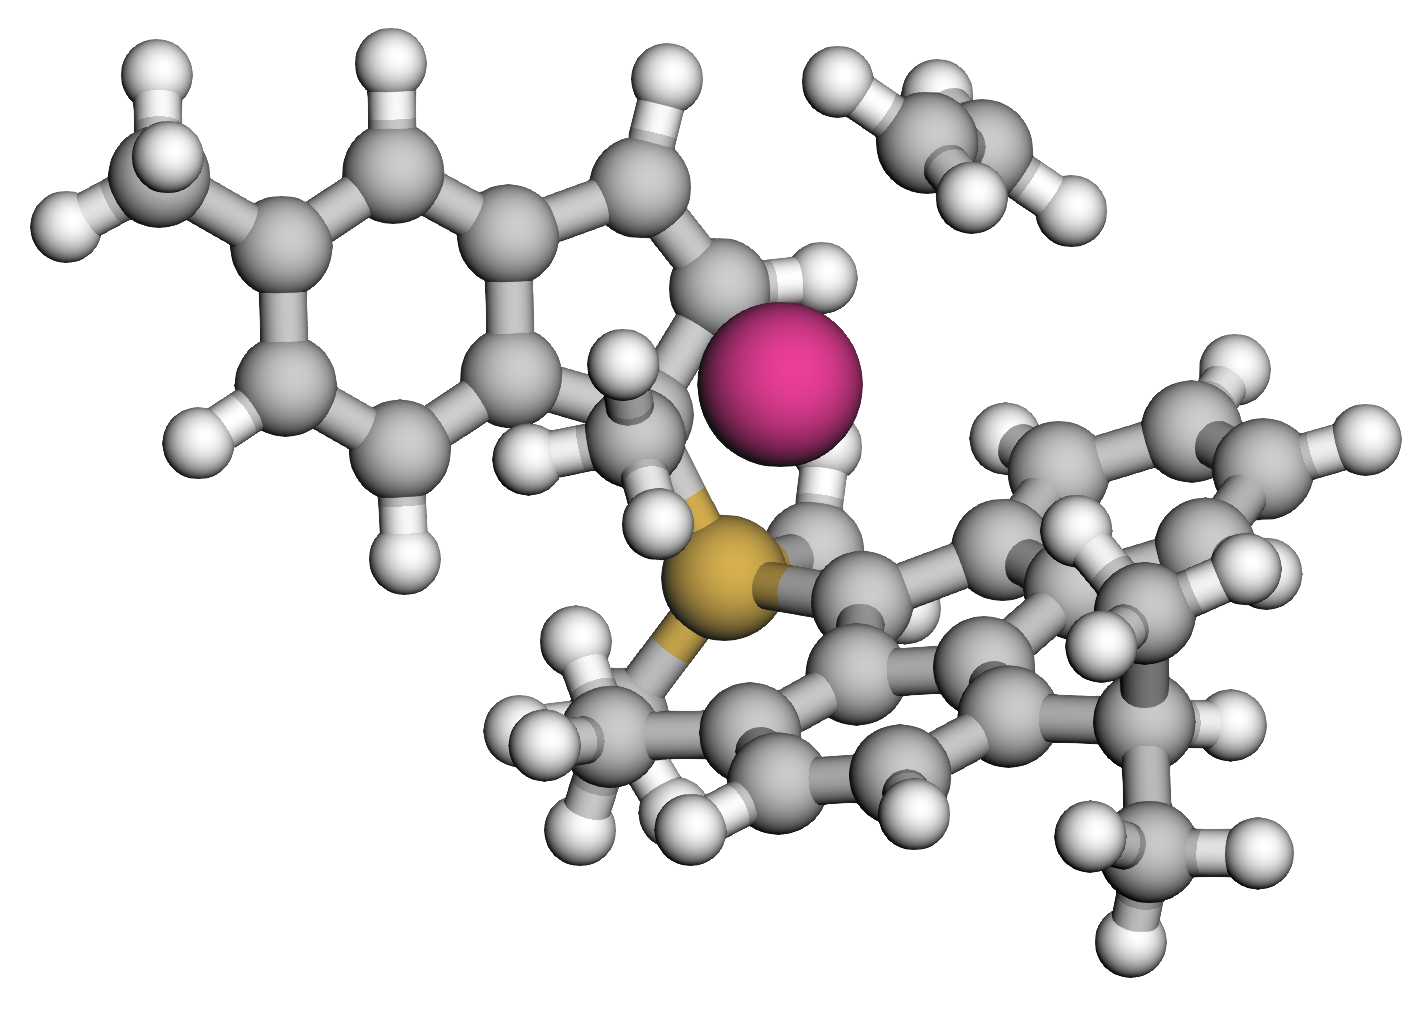 | 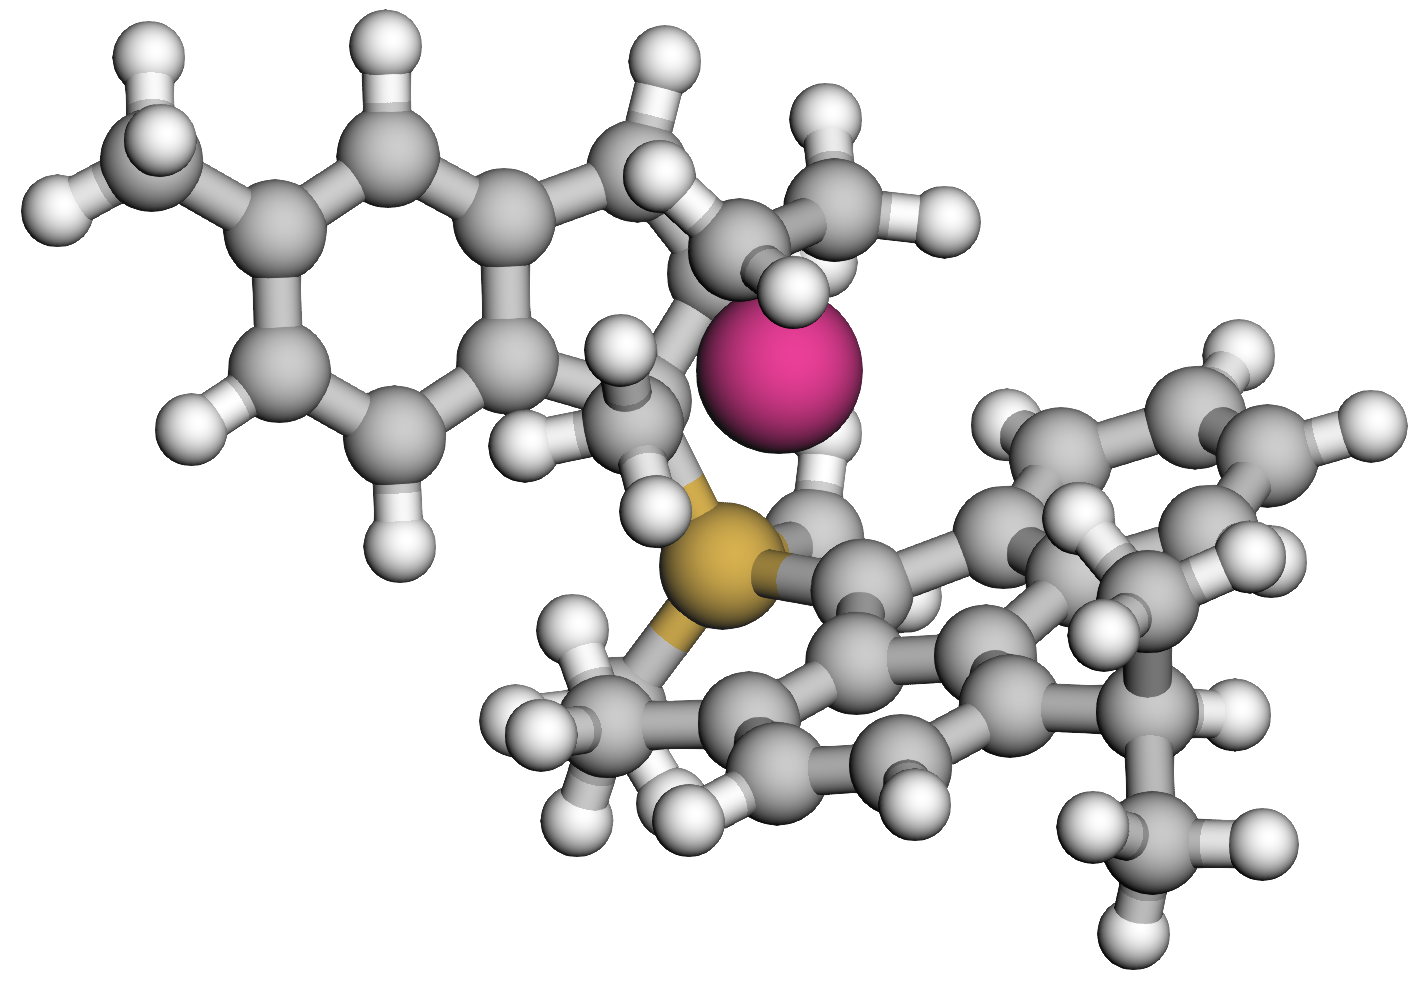 | 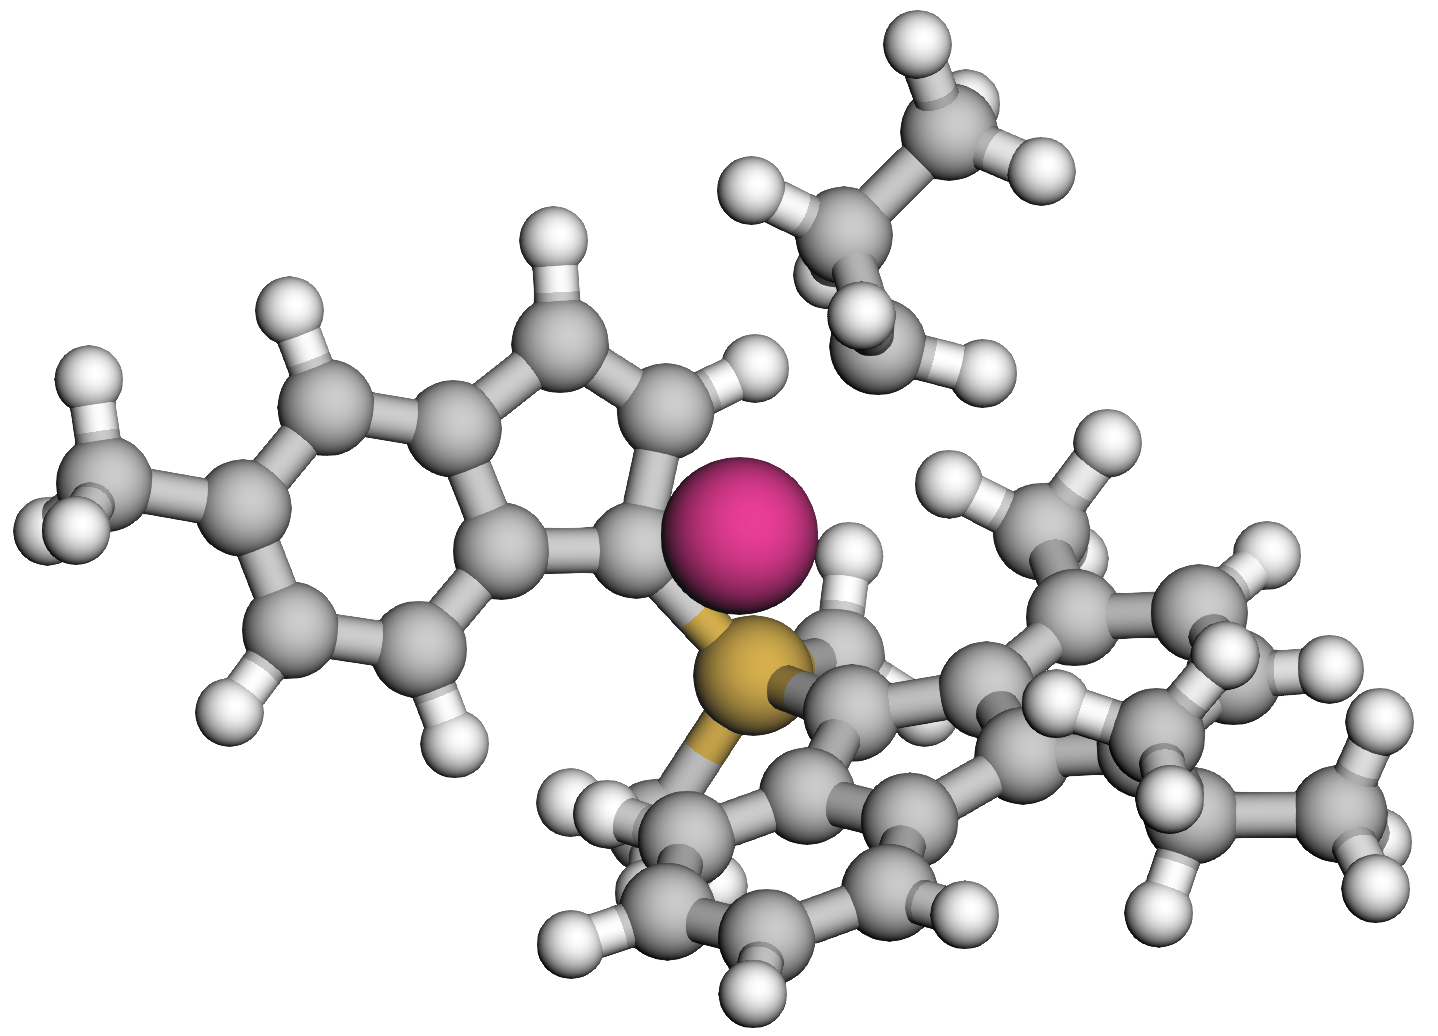 |
|  | 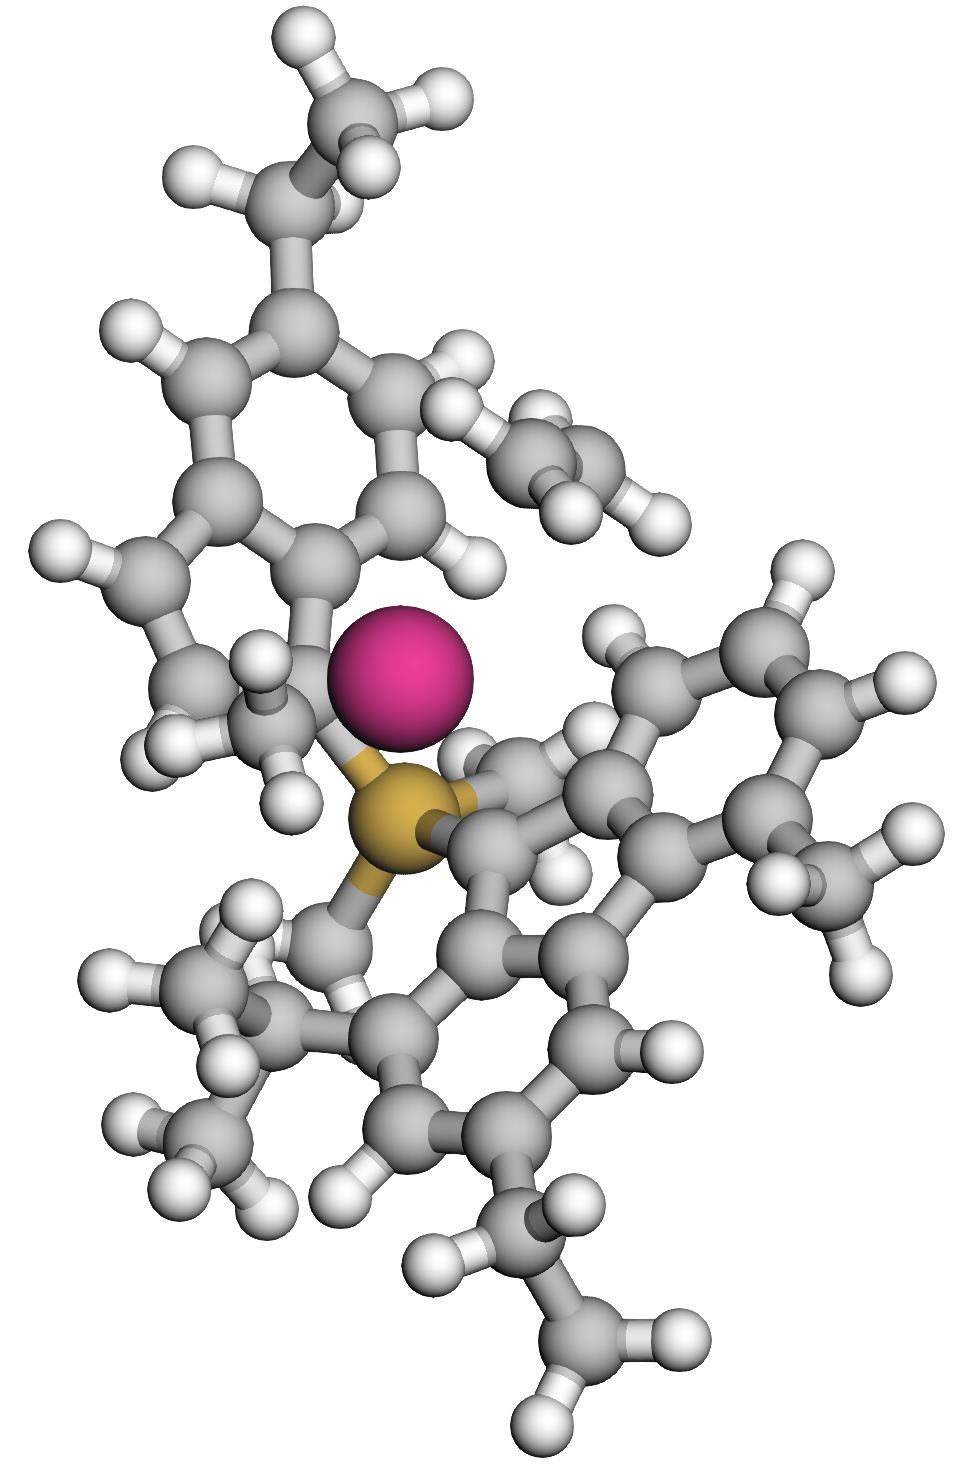 | 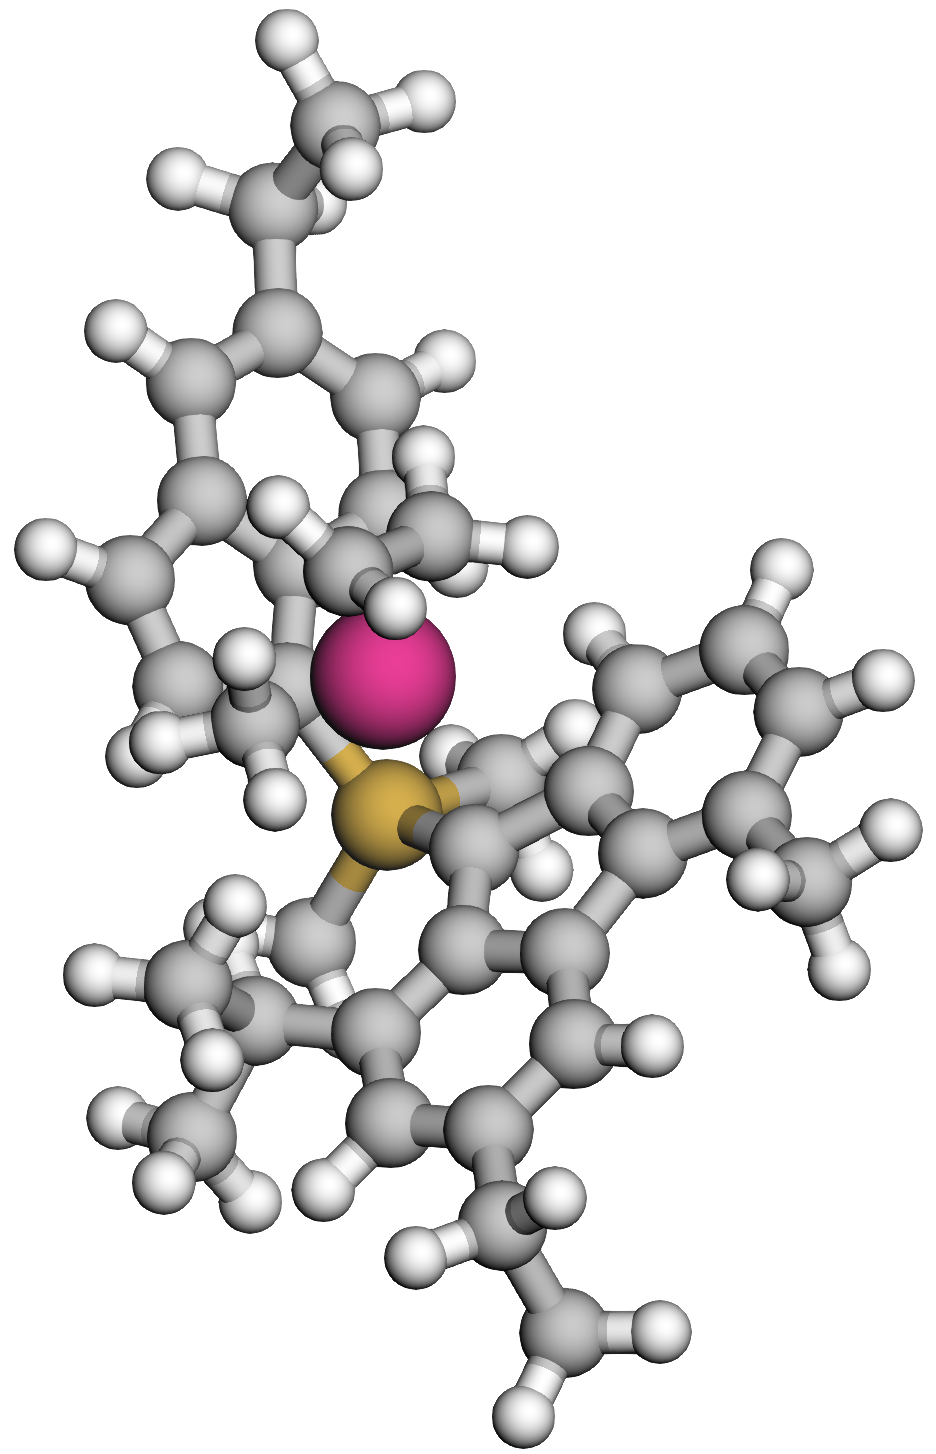 | 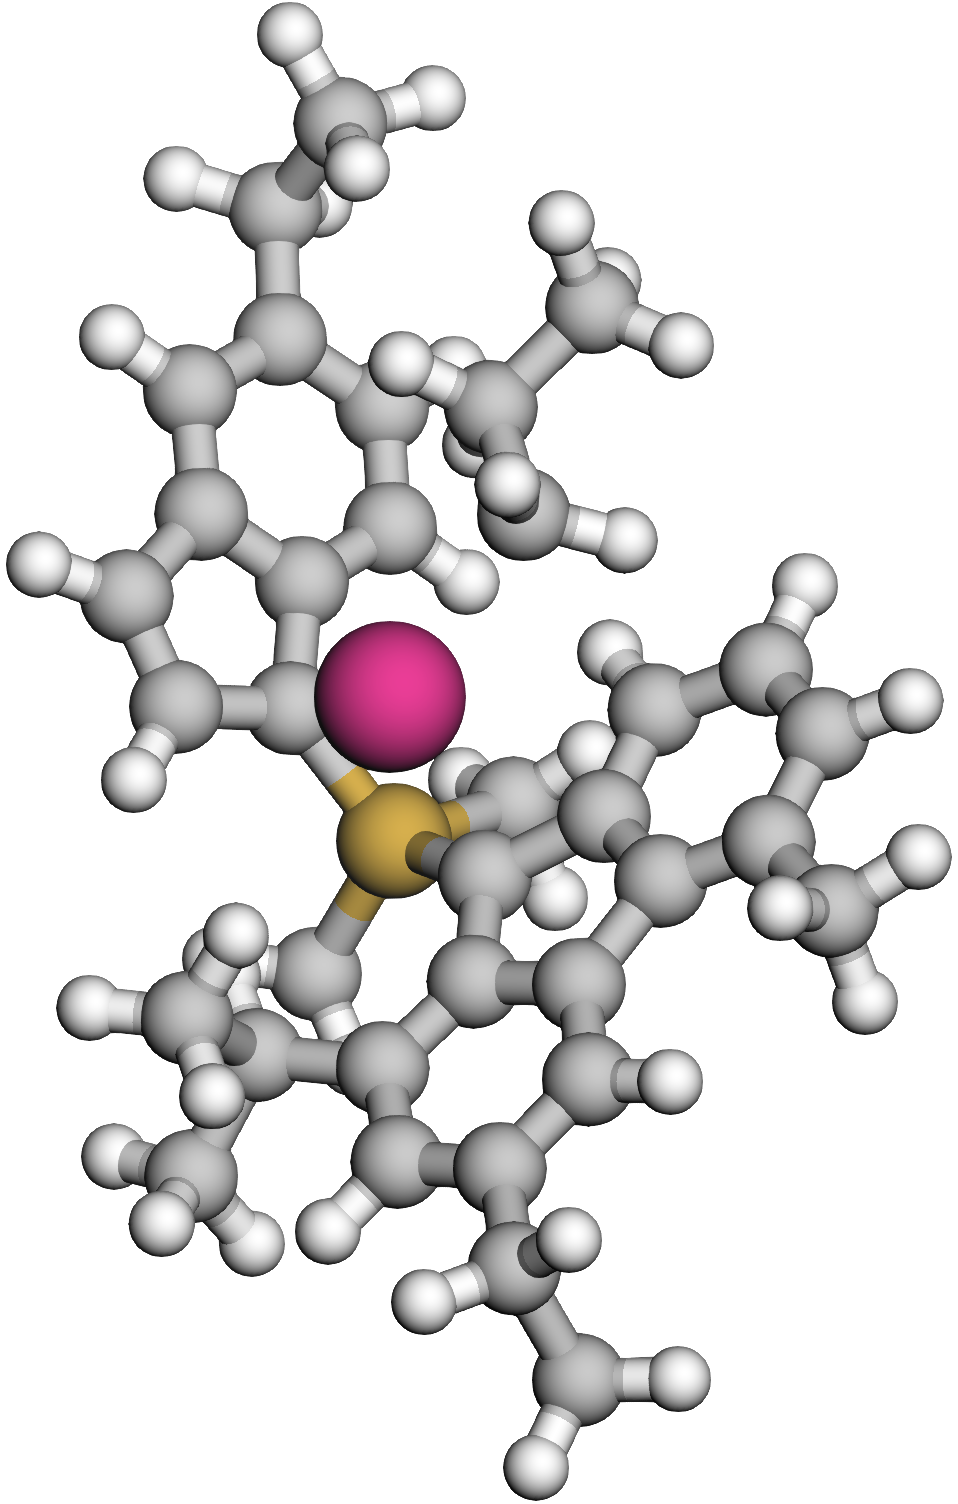 |
|  | 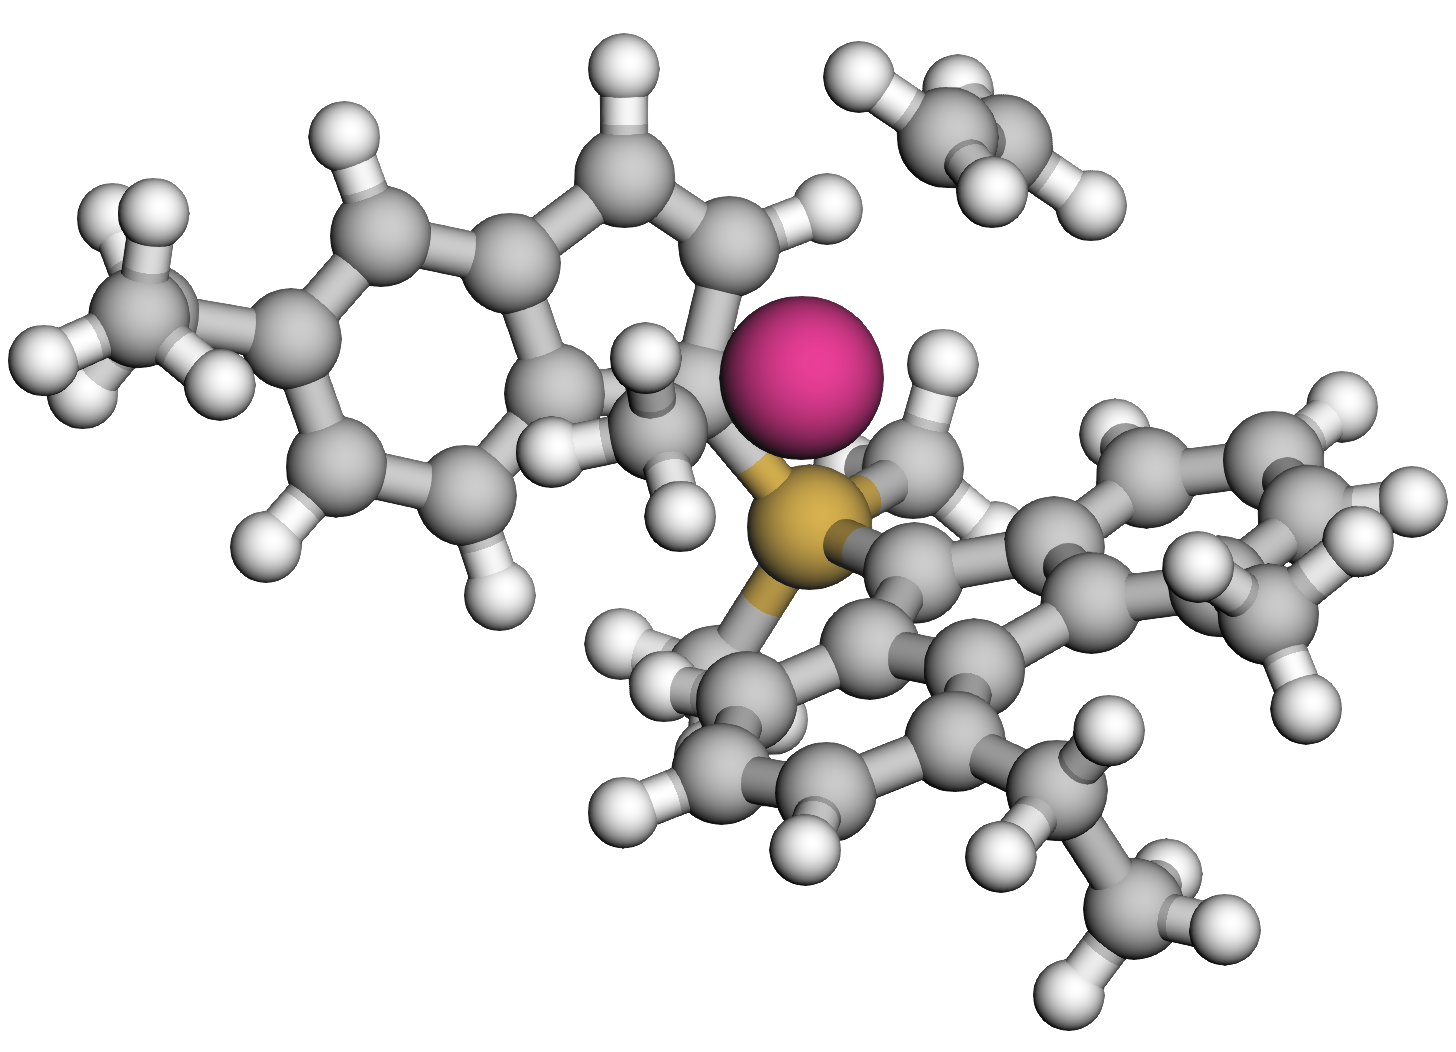 | 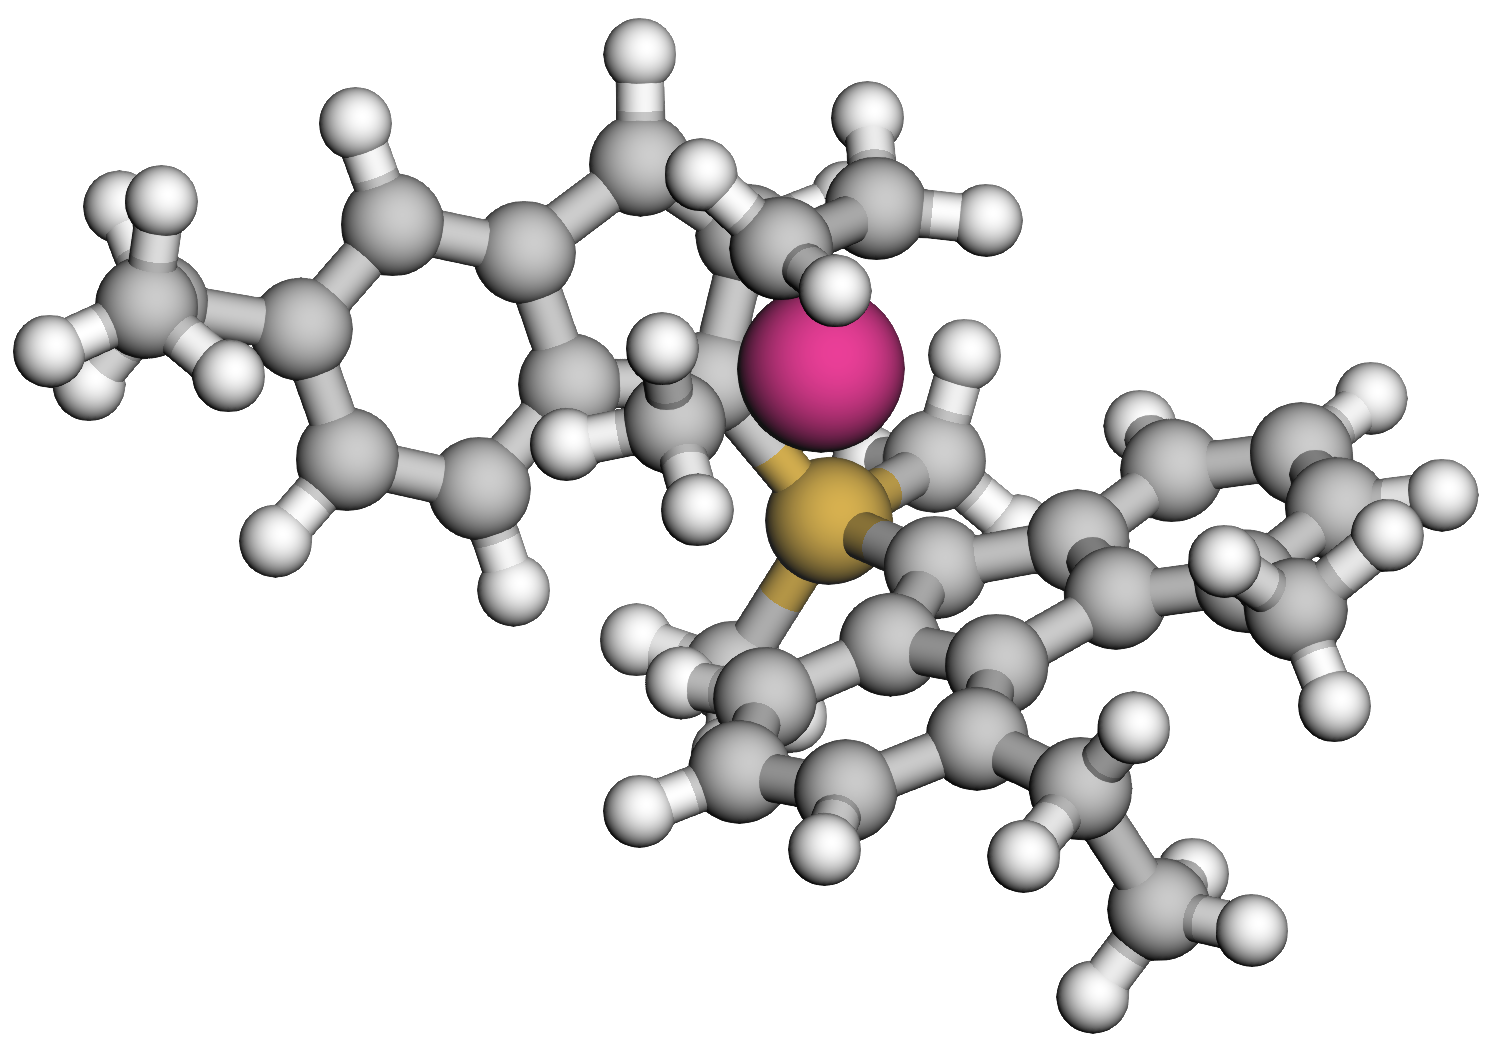 | 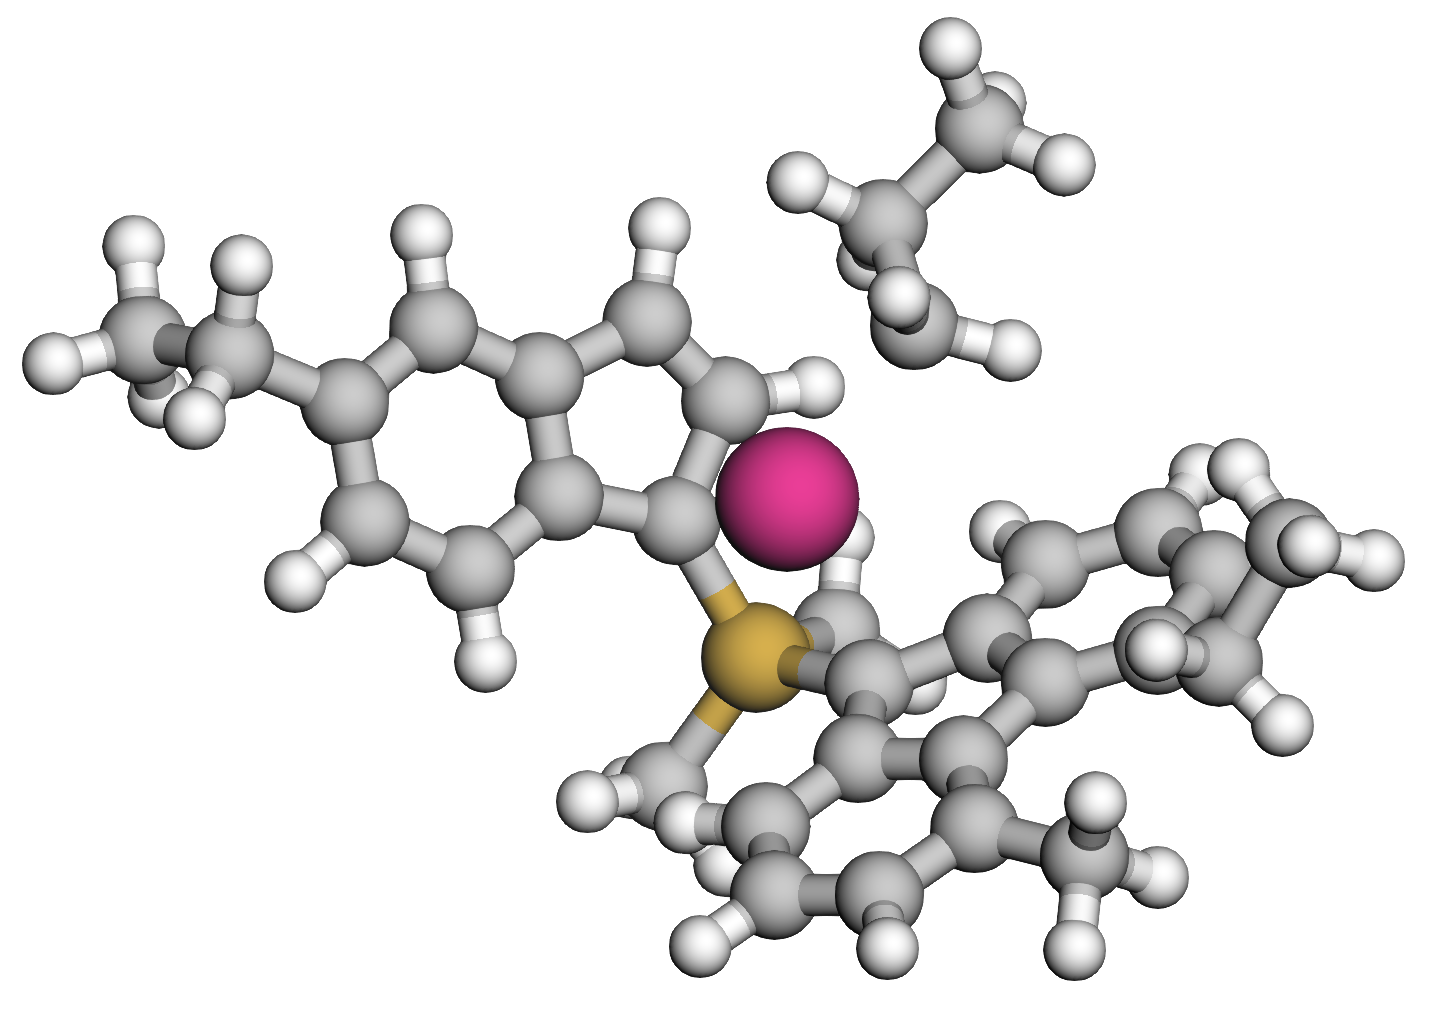 |
|  | 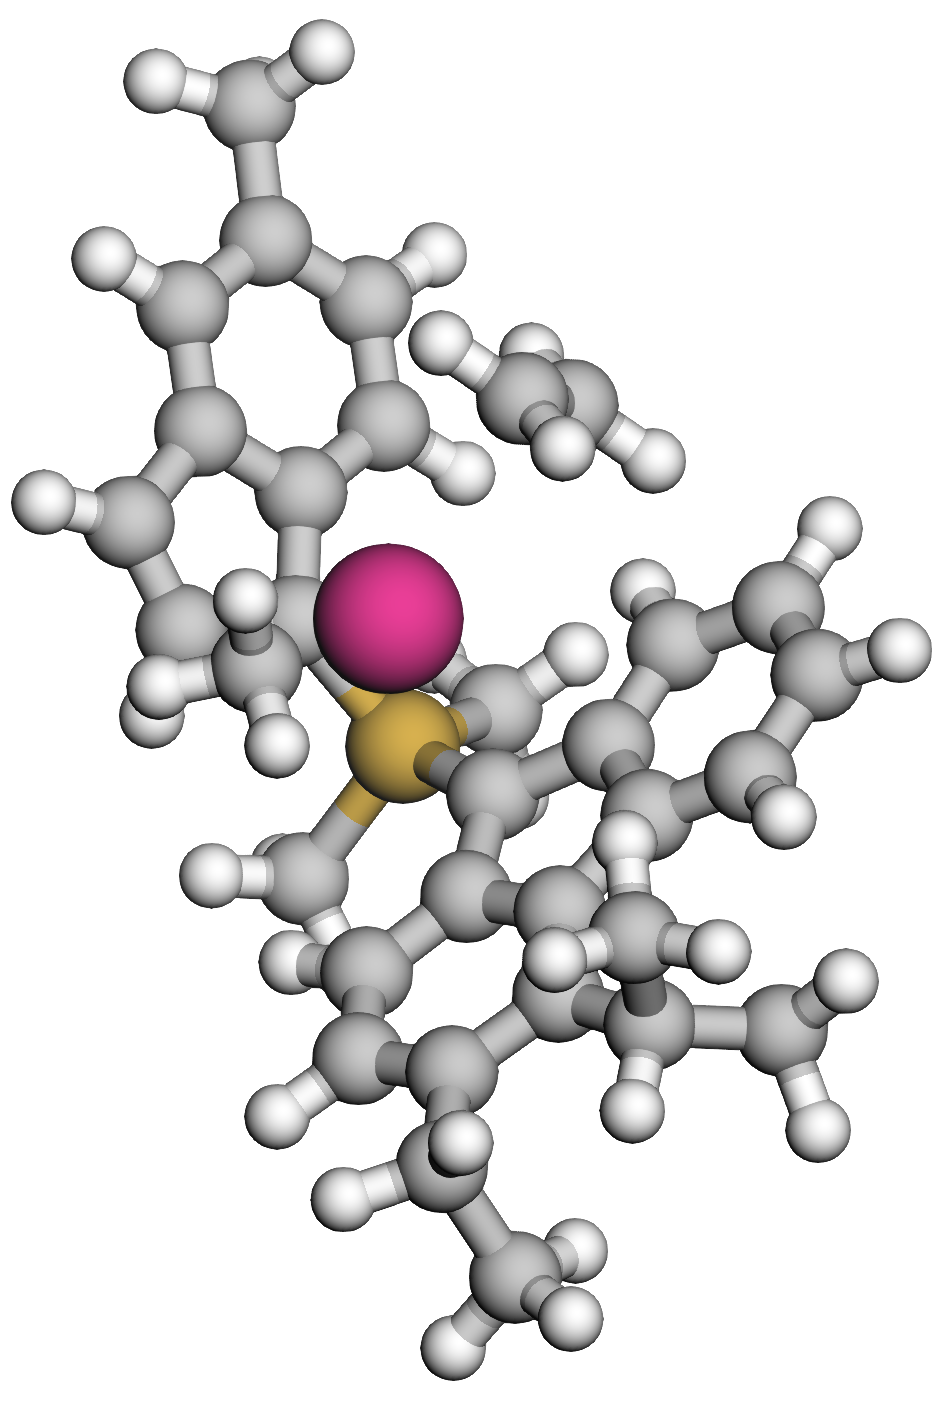 | 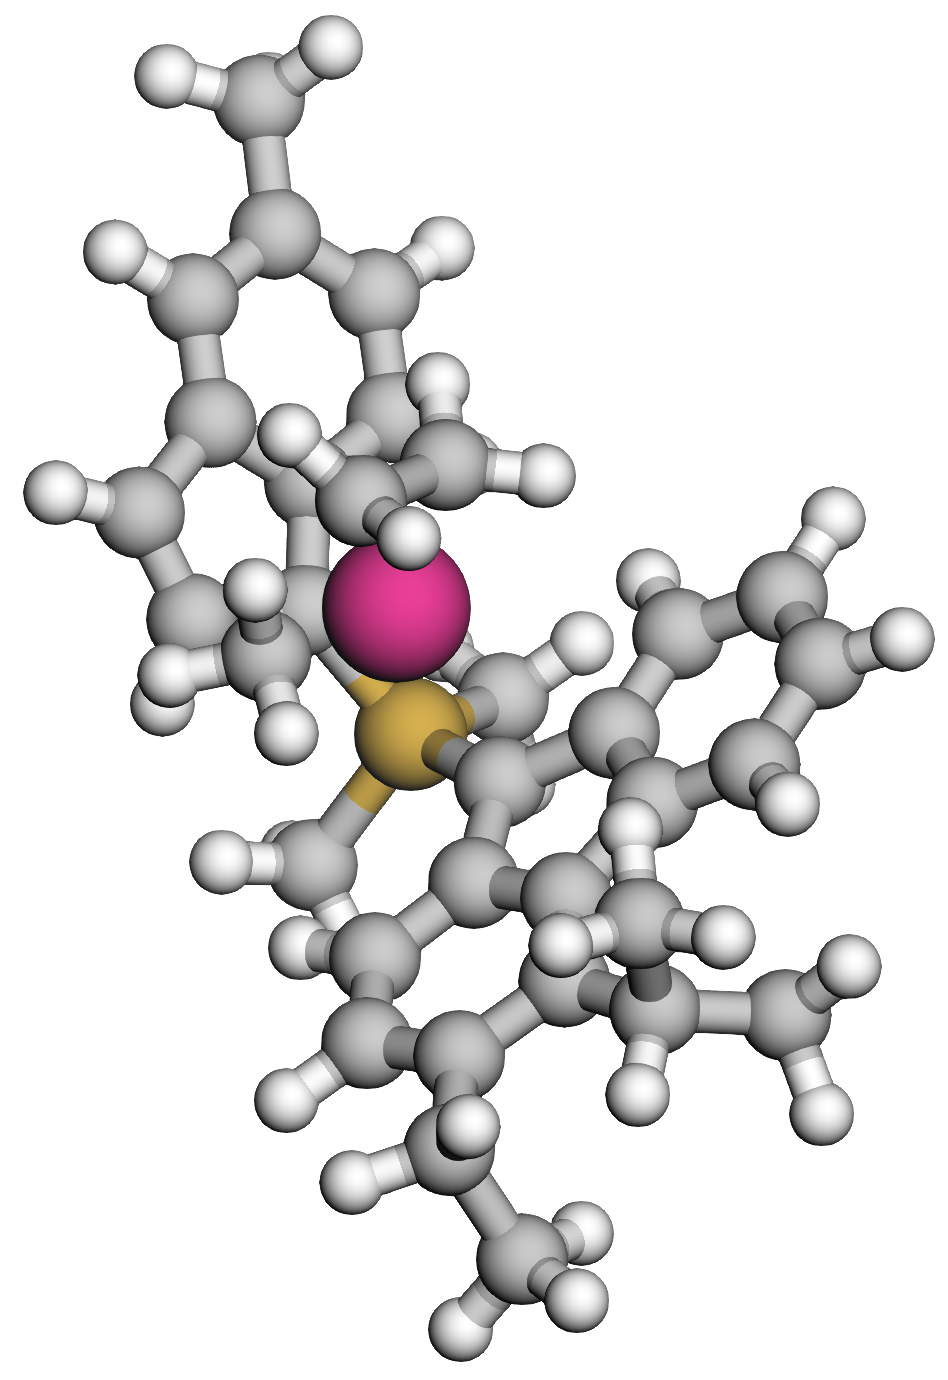 | 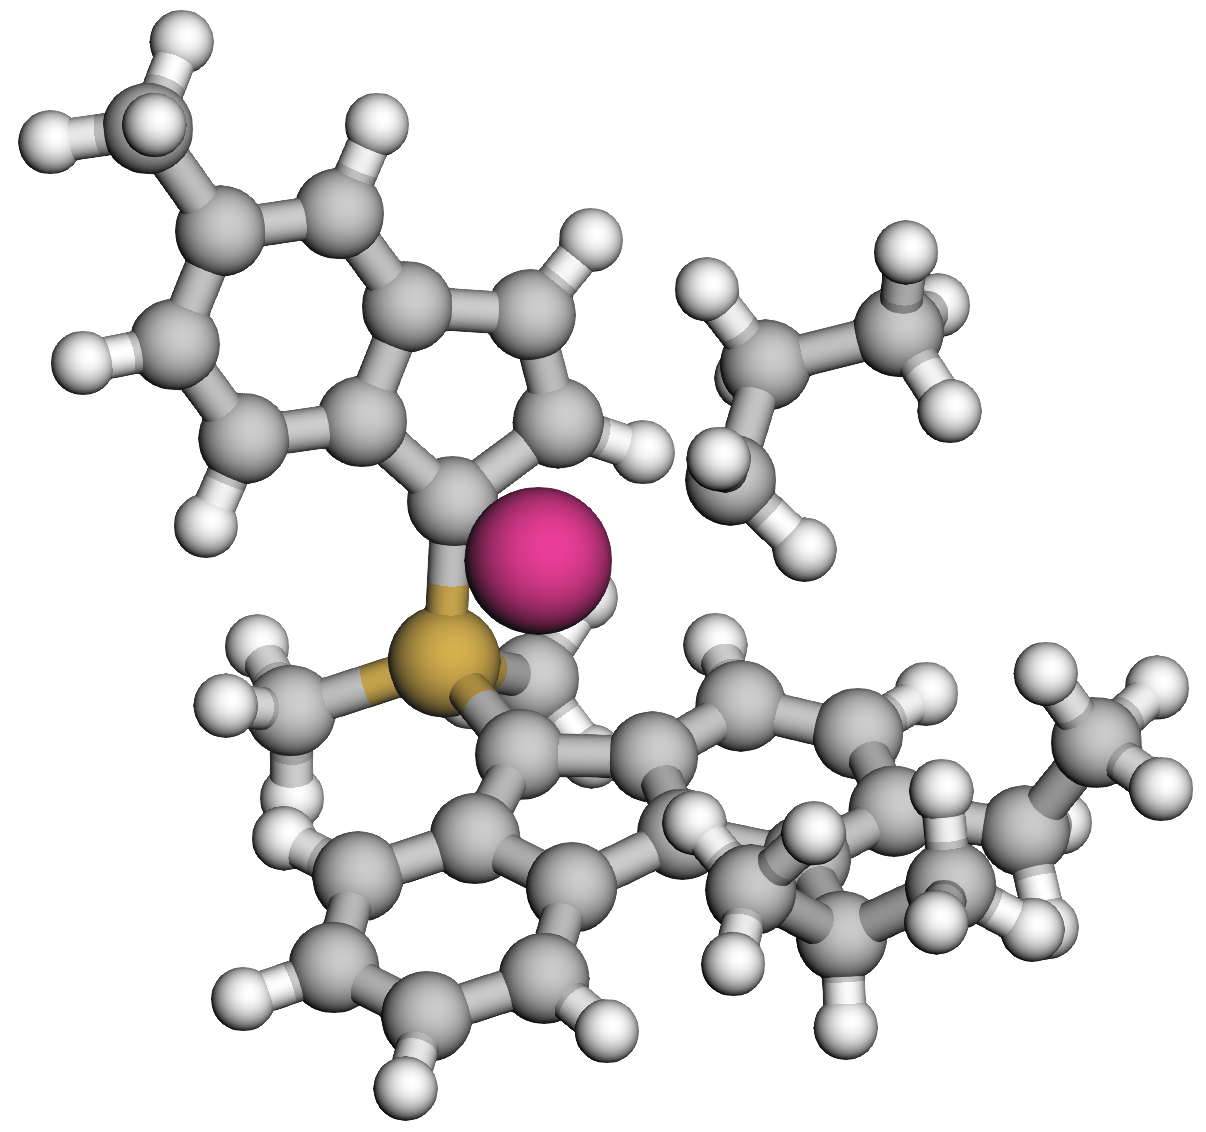 |
|  | 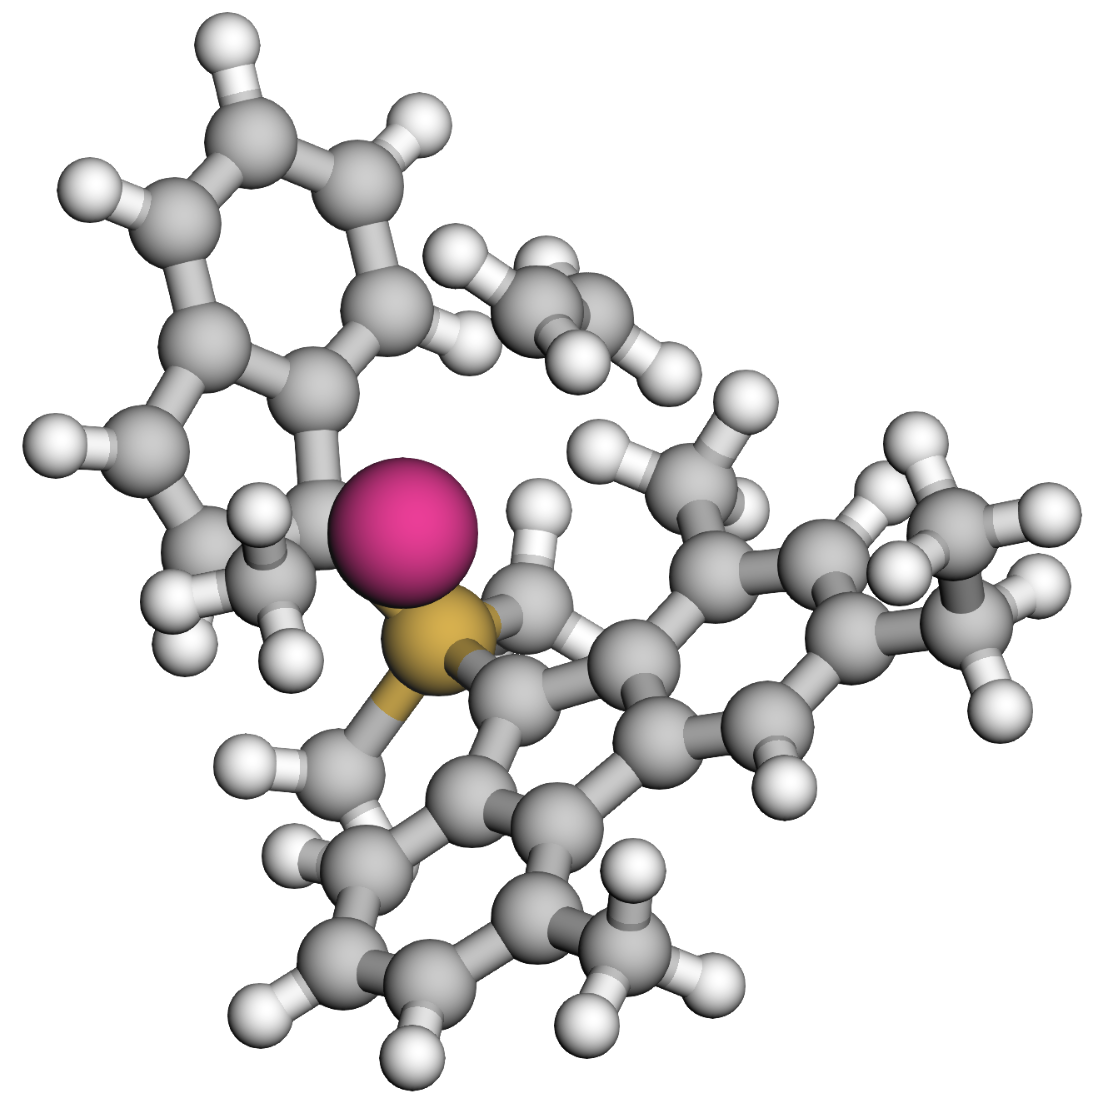 | 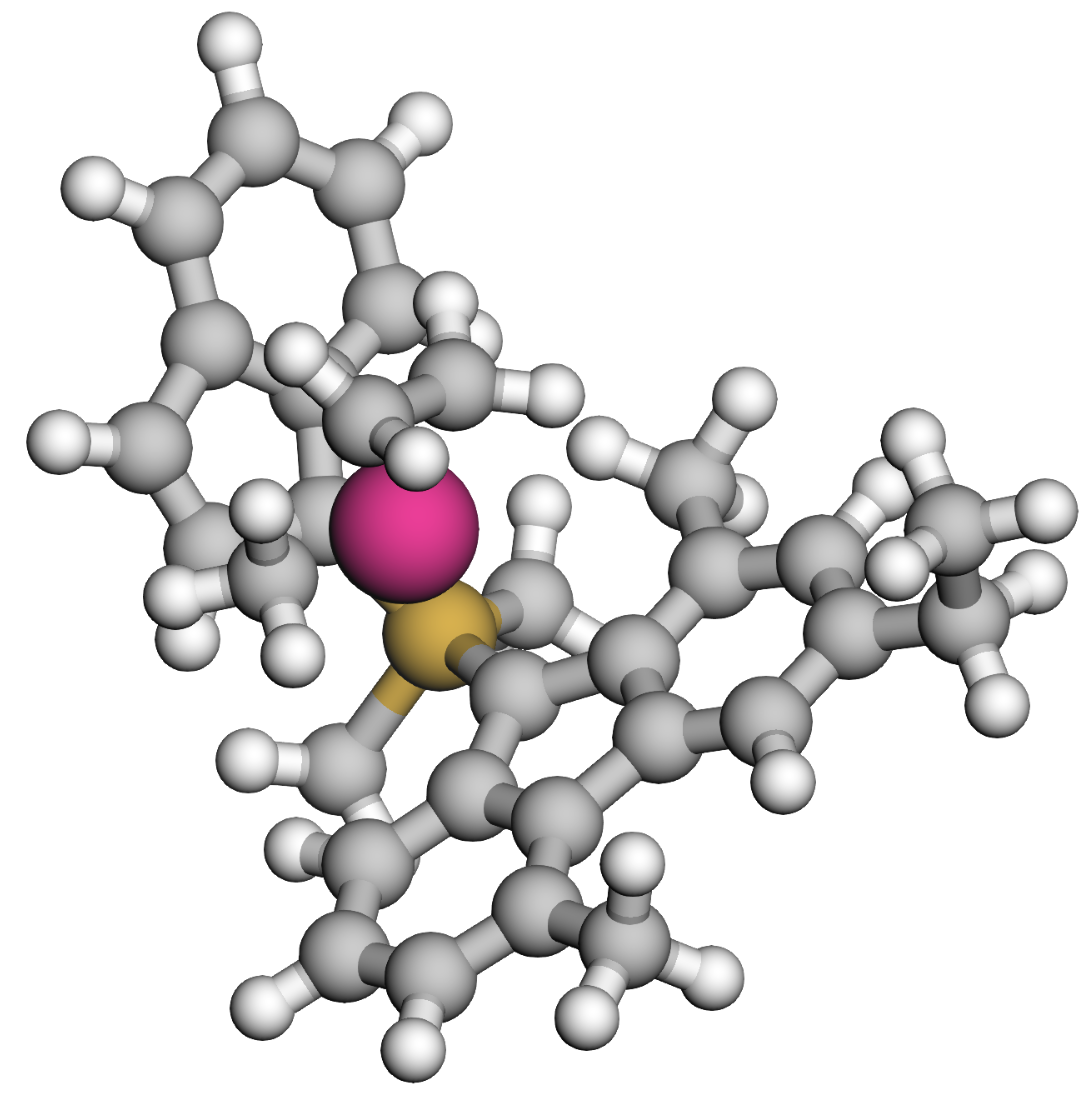 | 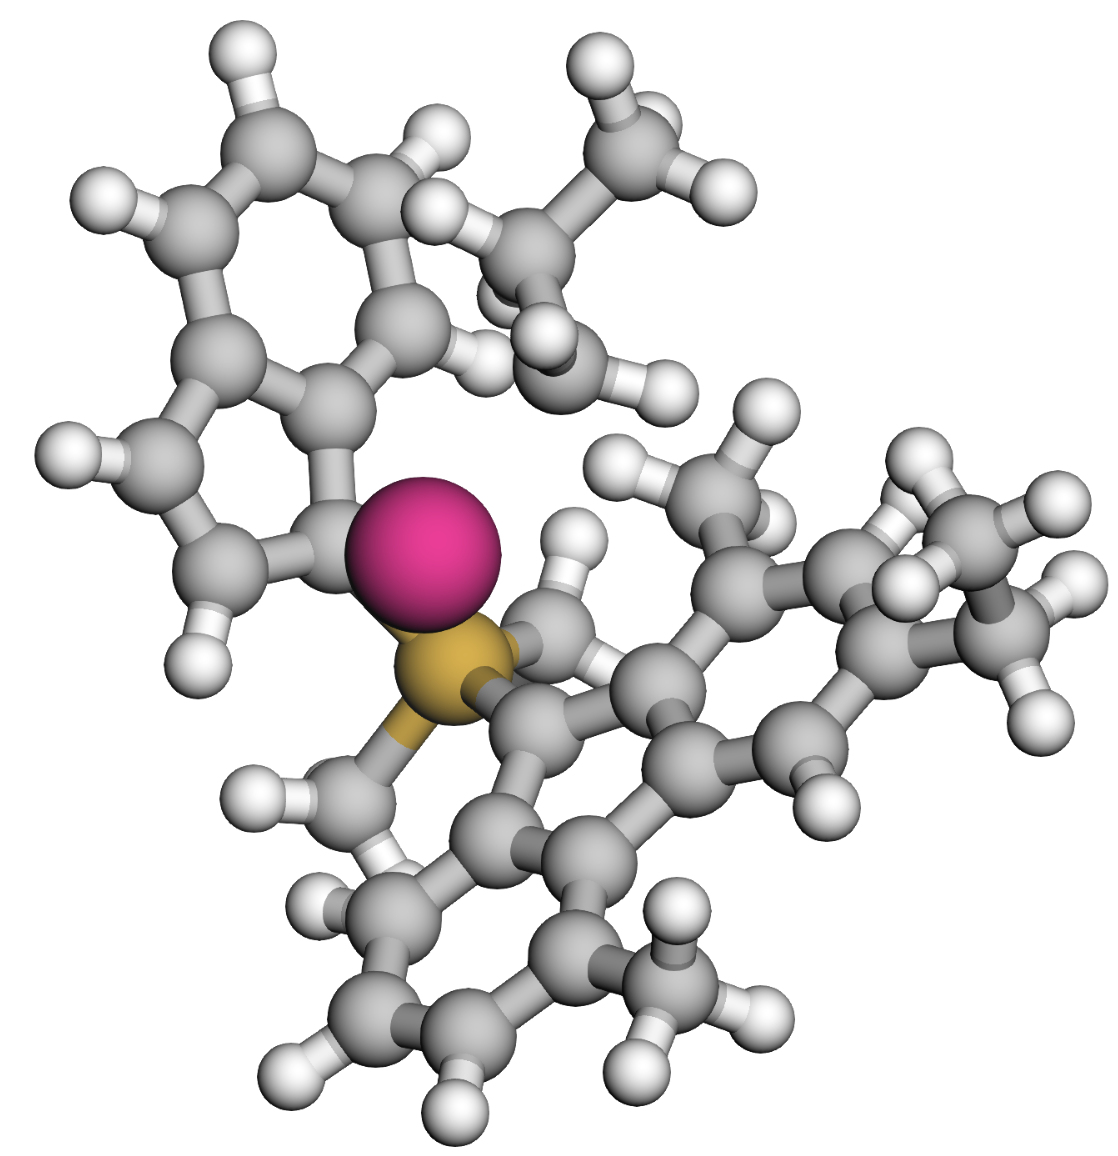 |
|  | 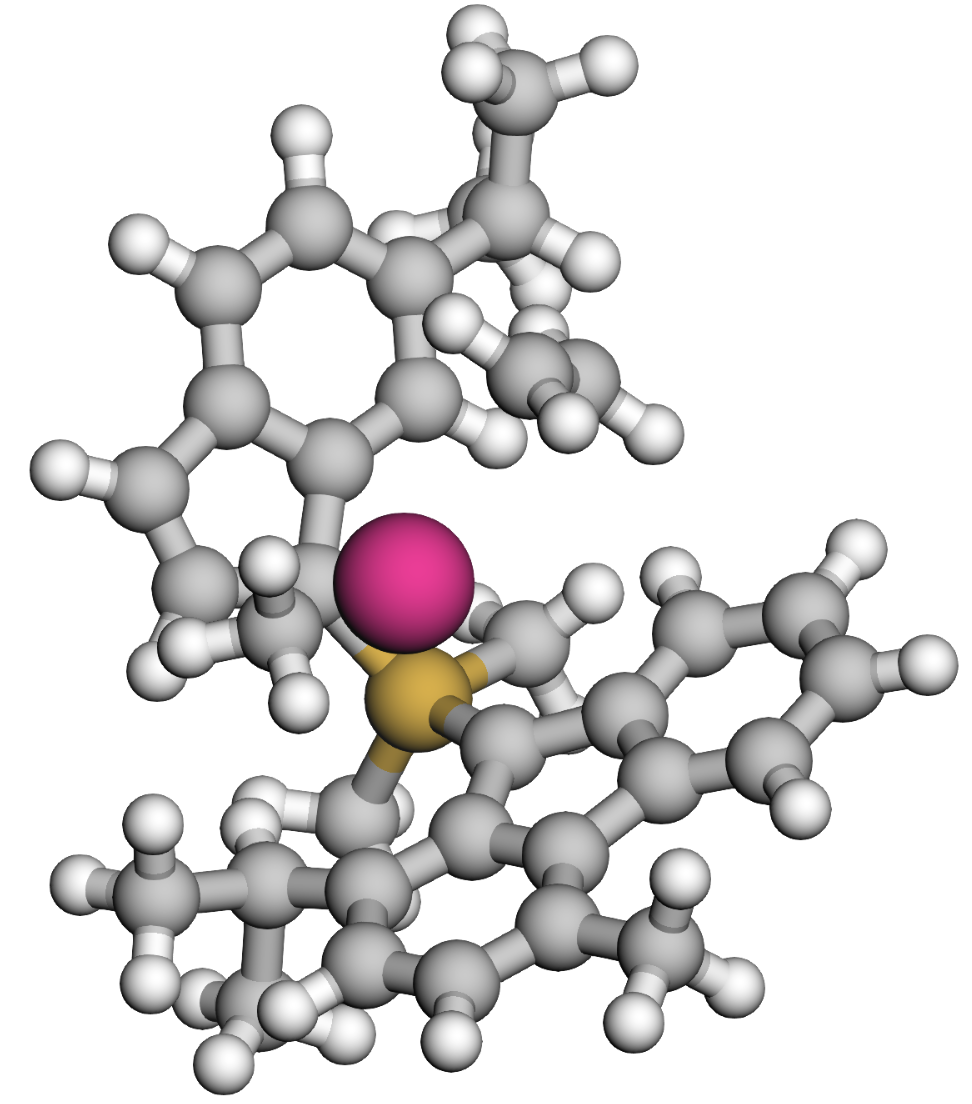 | 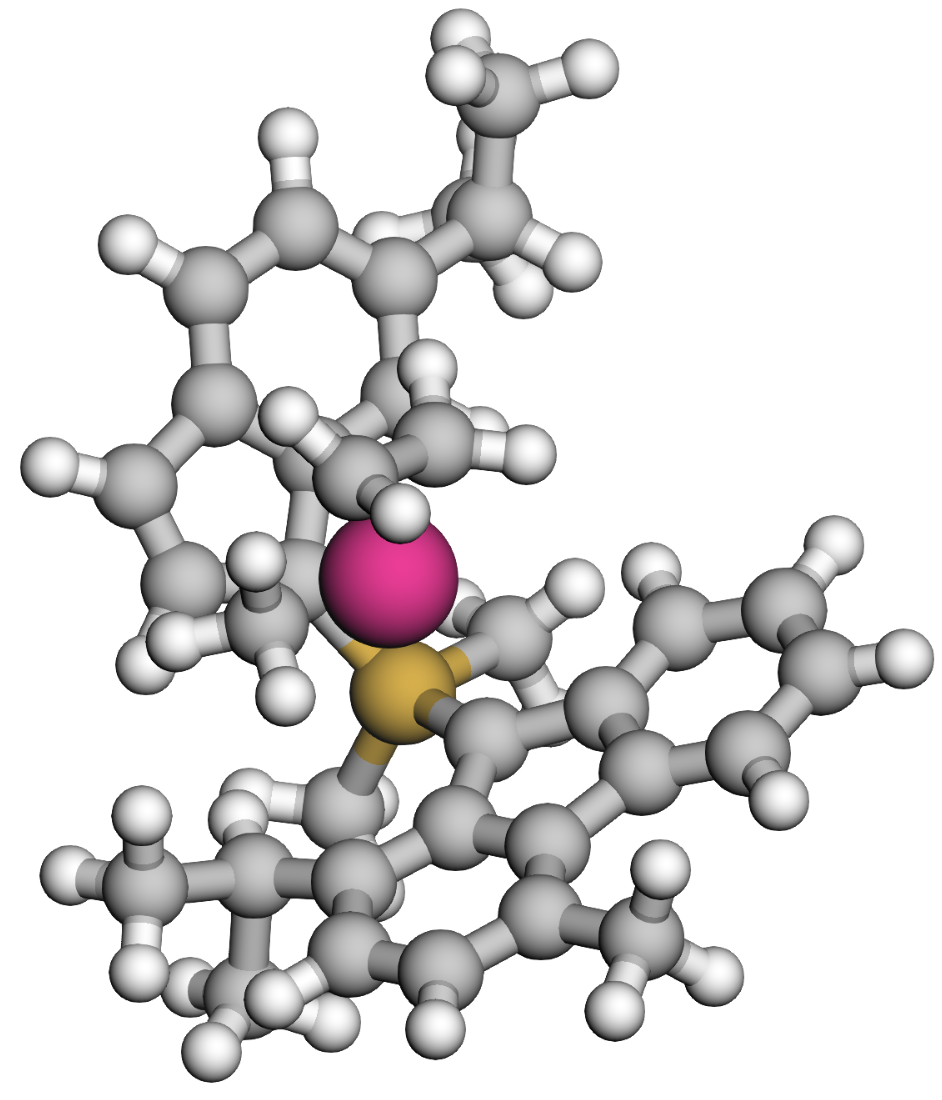 | 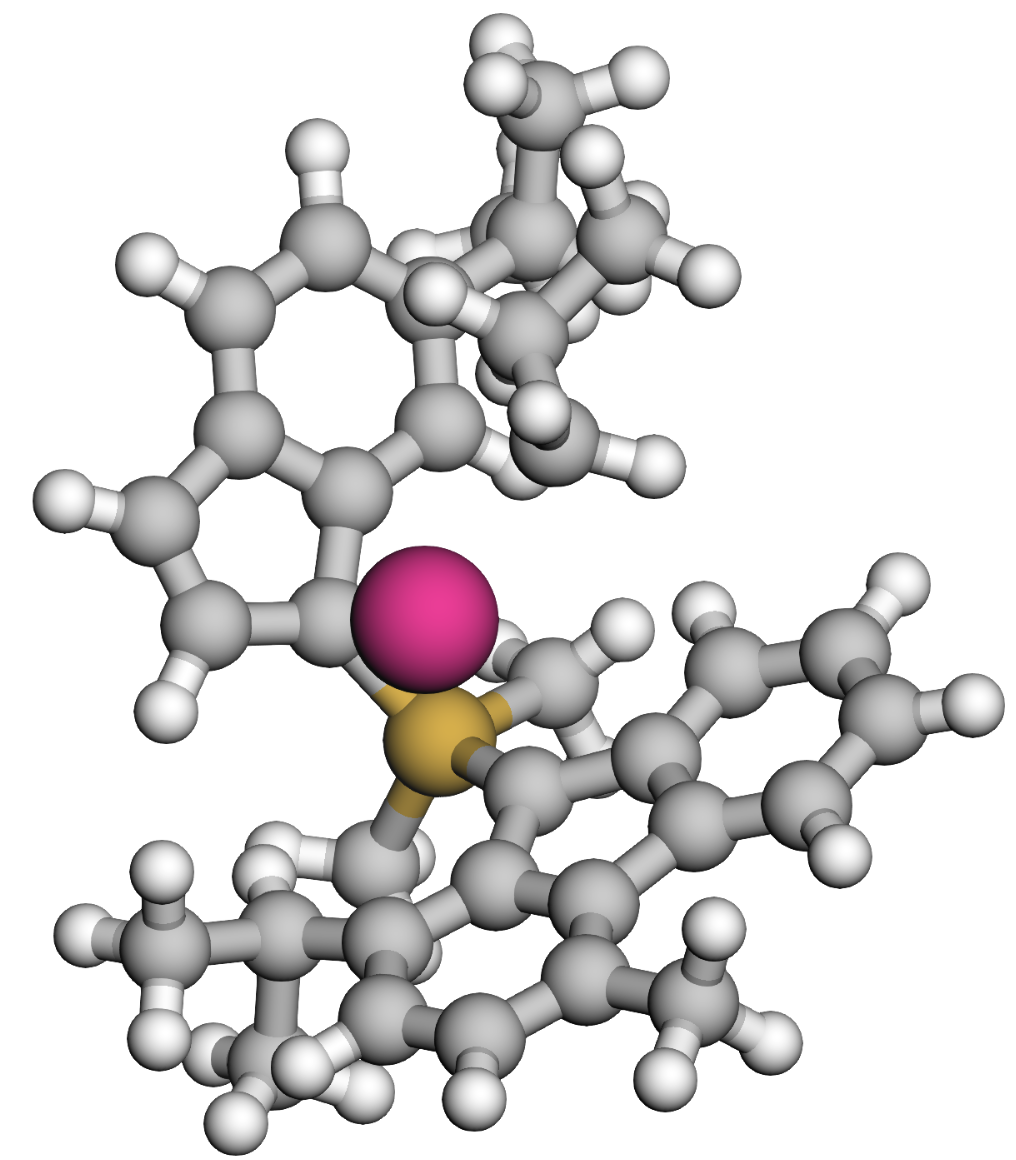 |
|  | 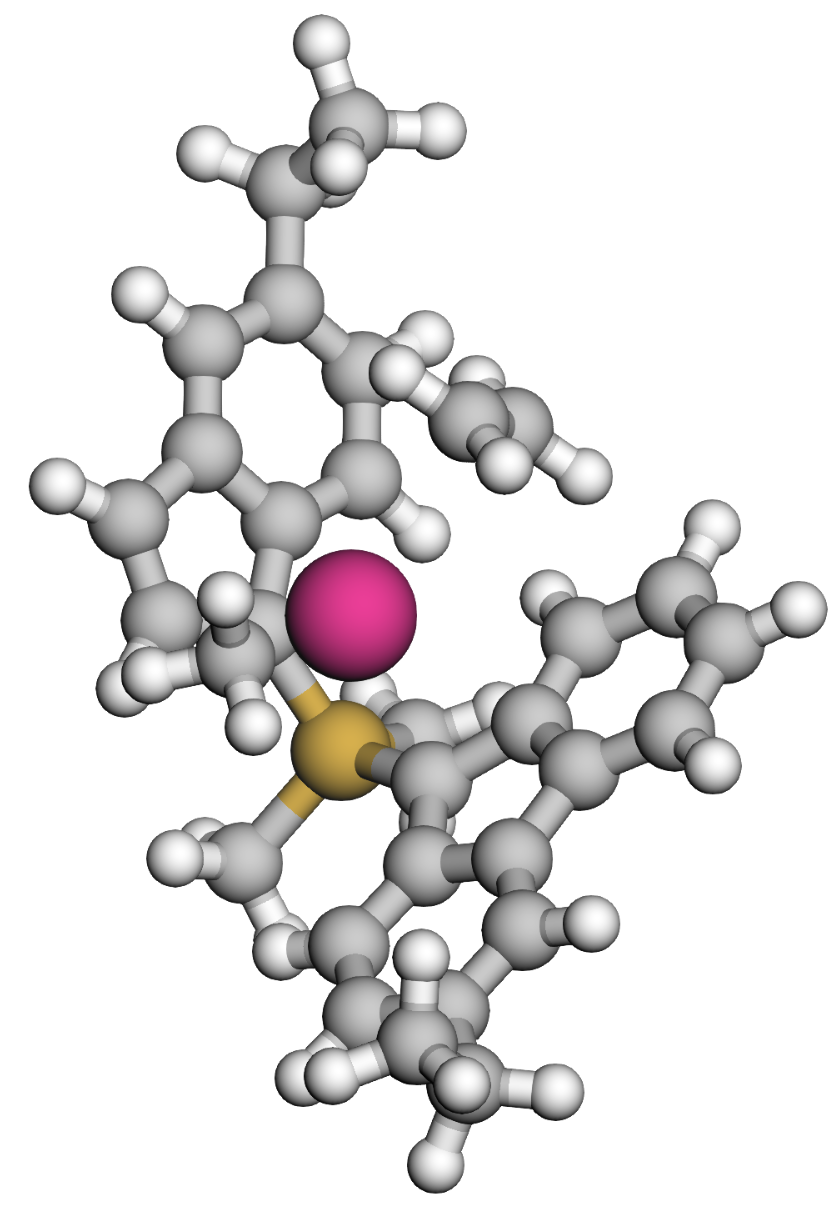 | 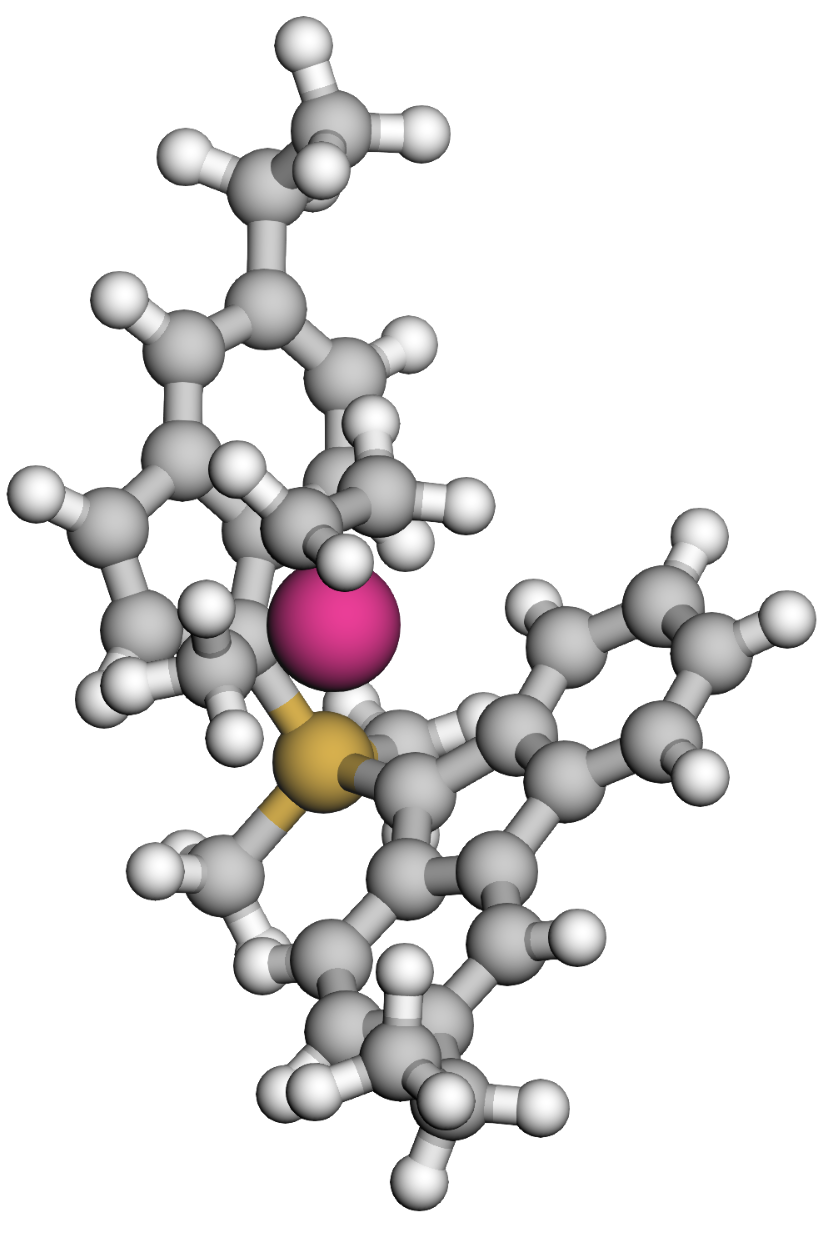 | 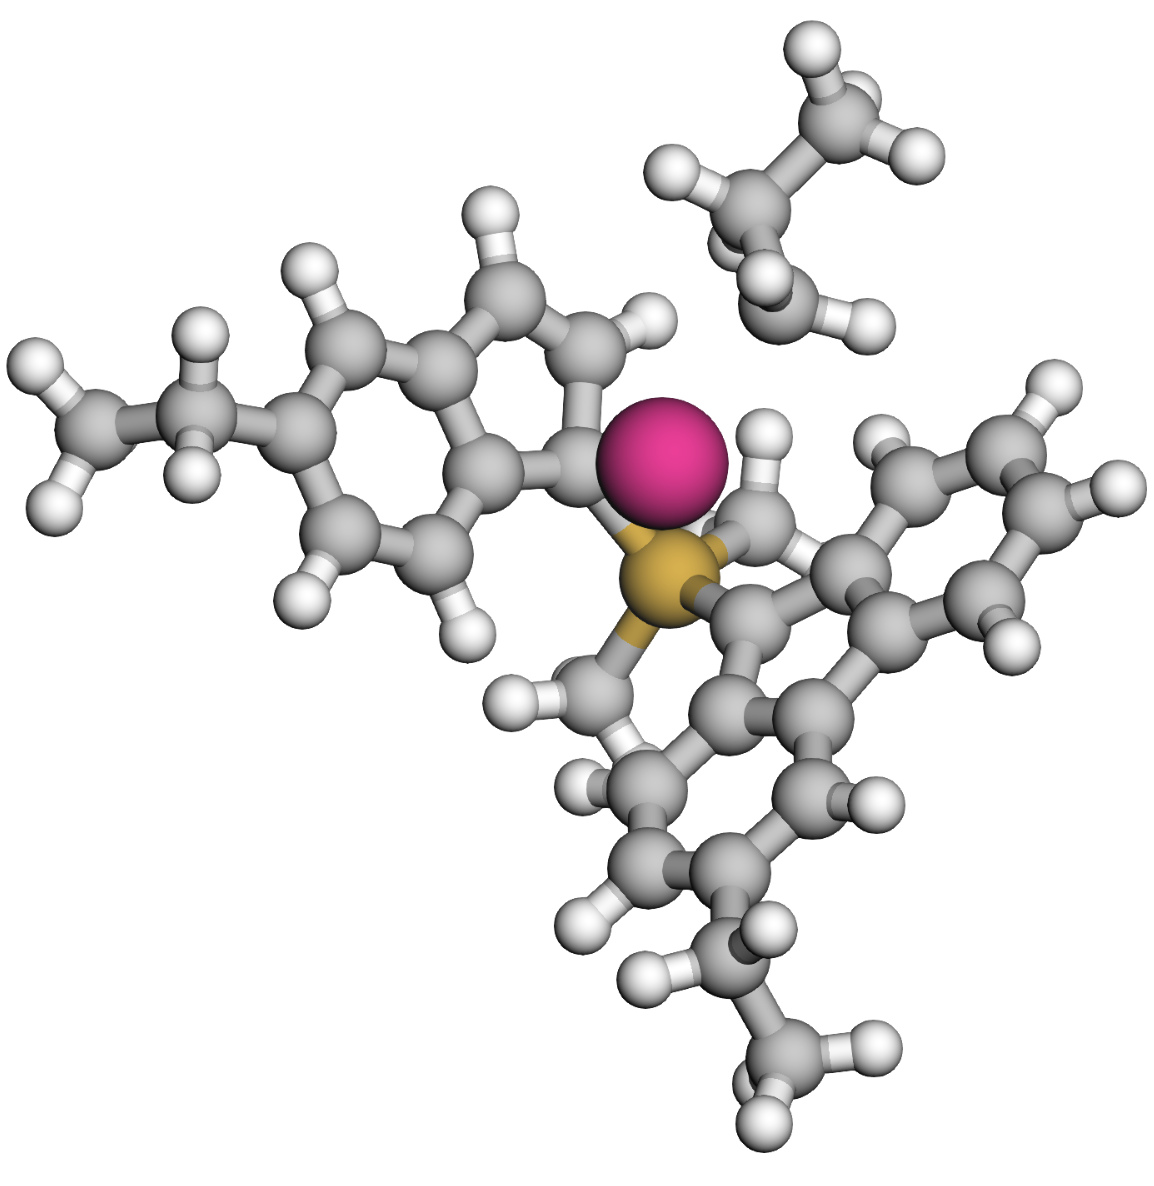 |
|  | 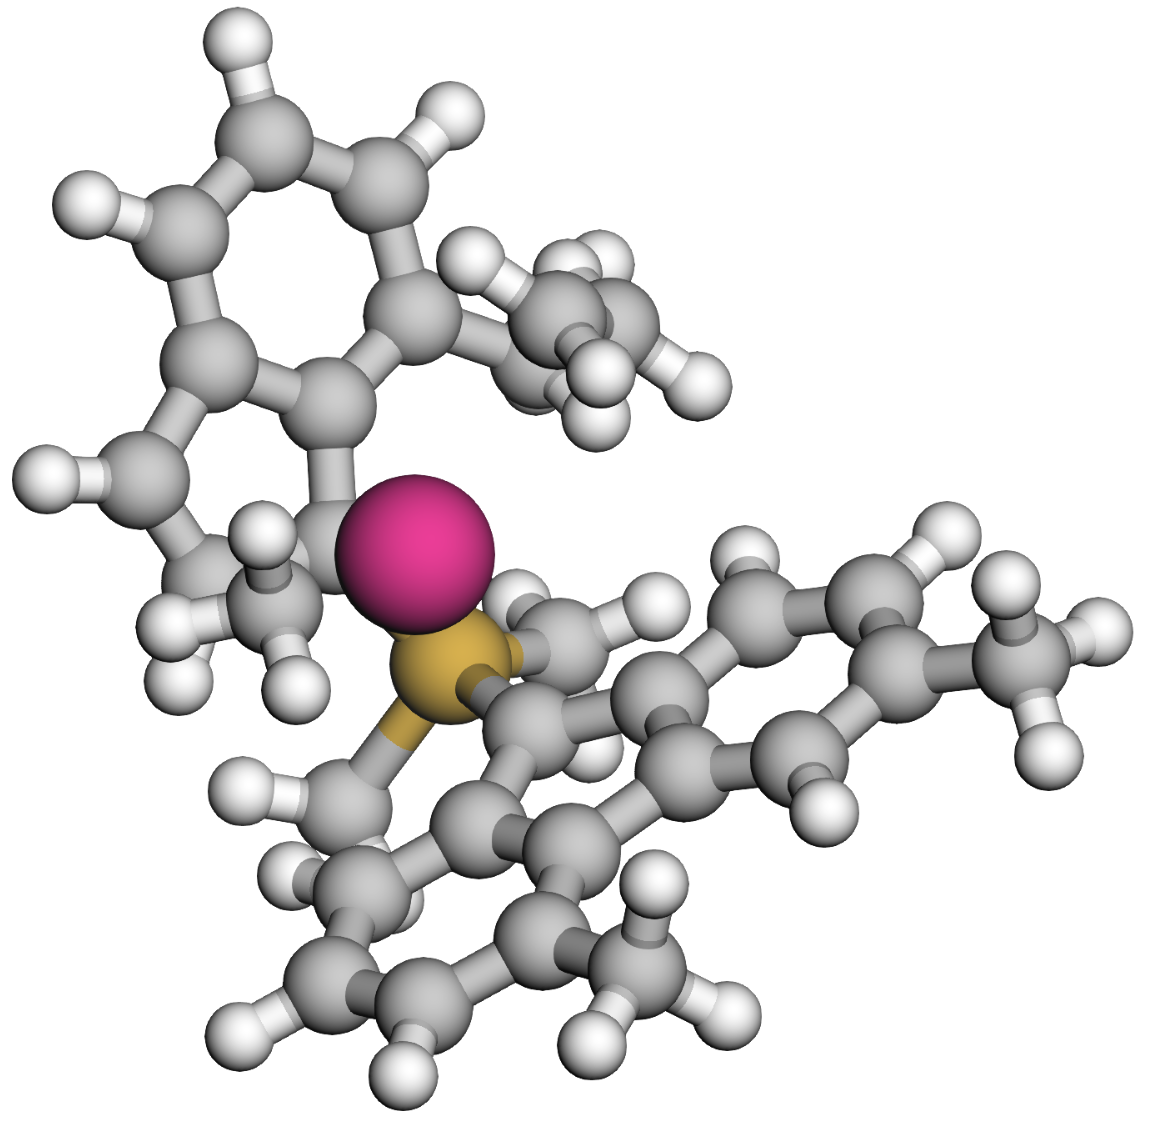 | 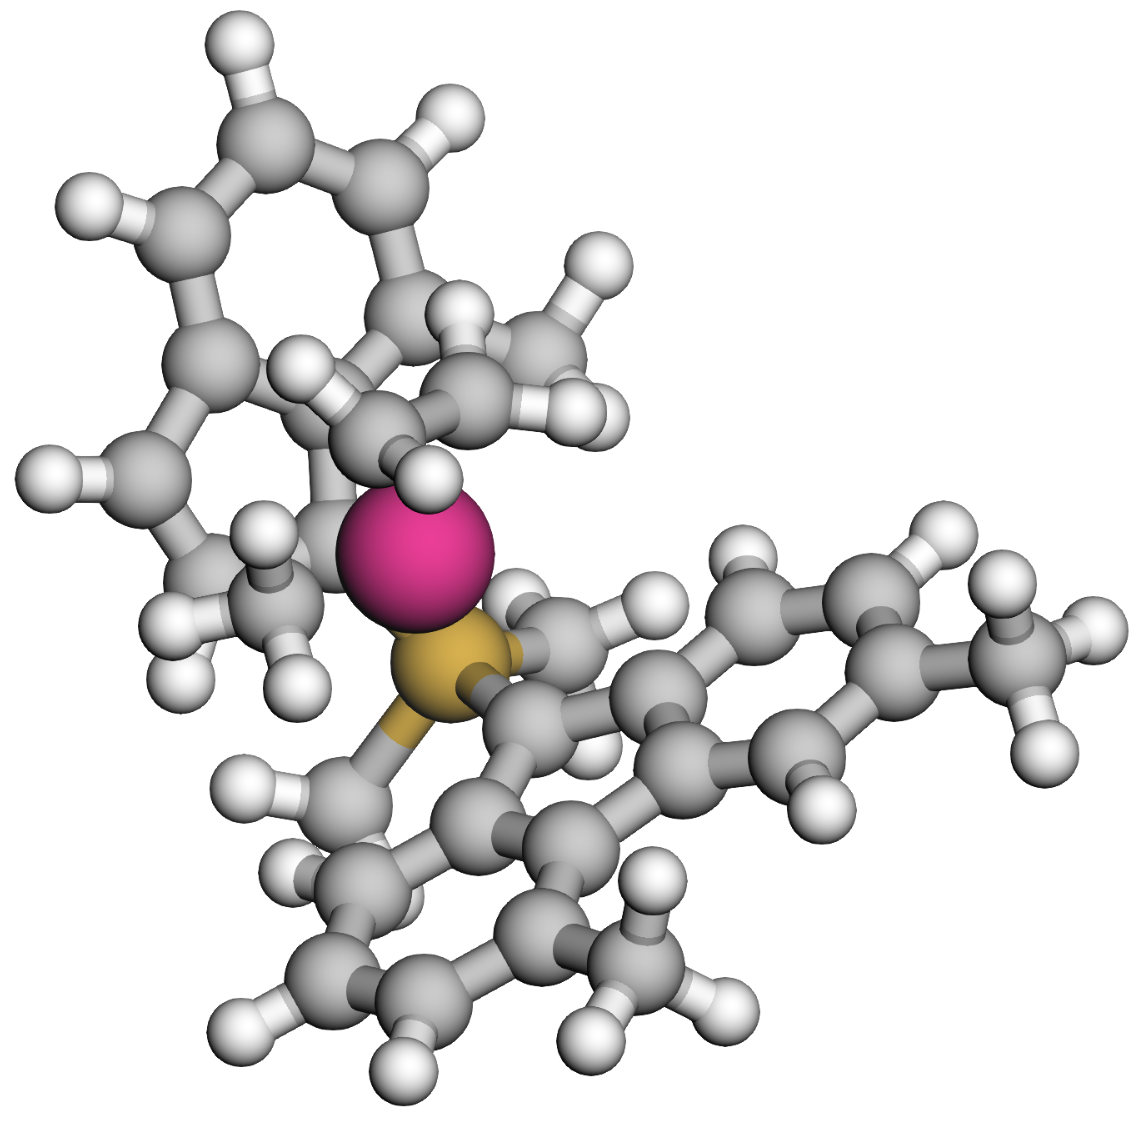 | 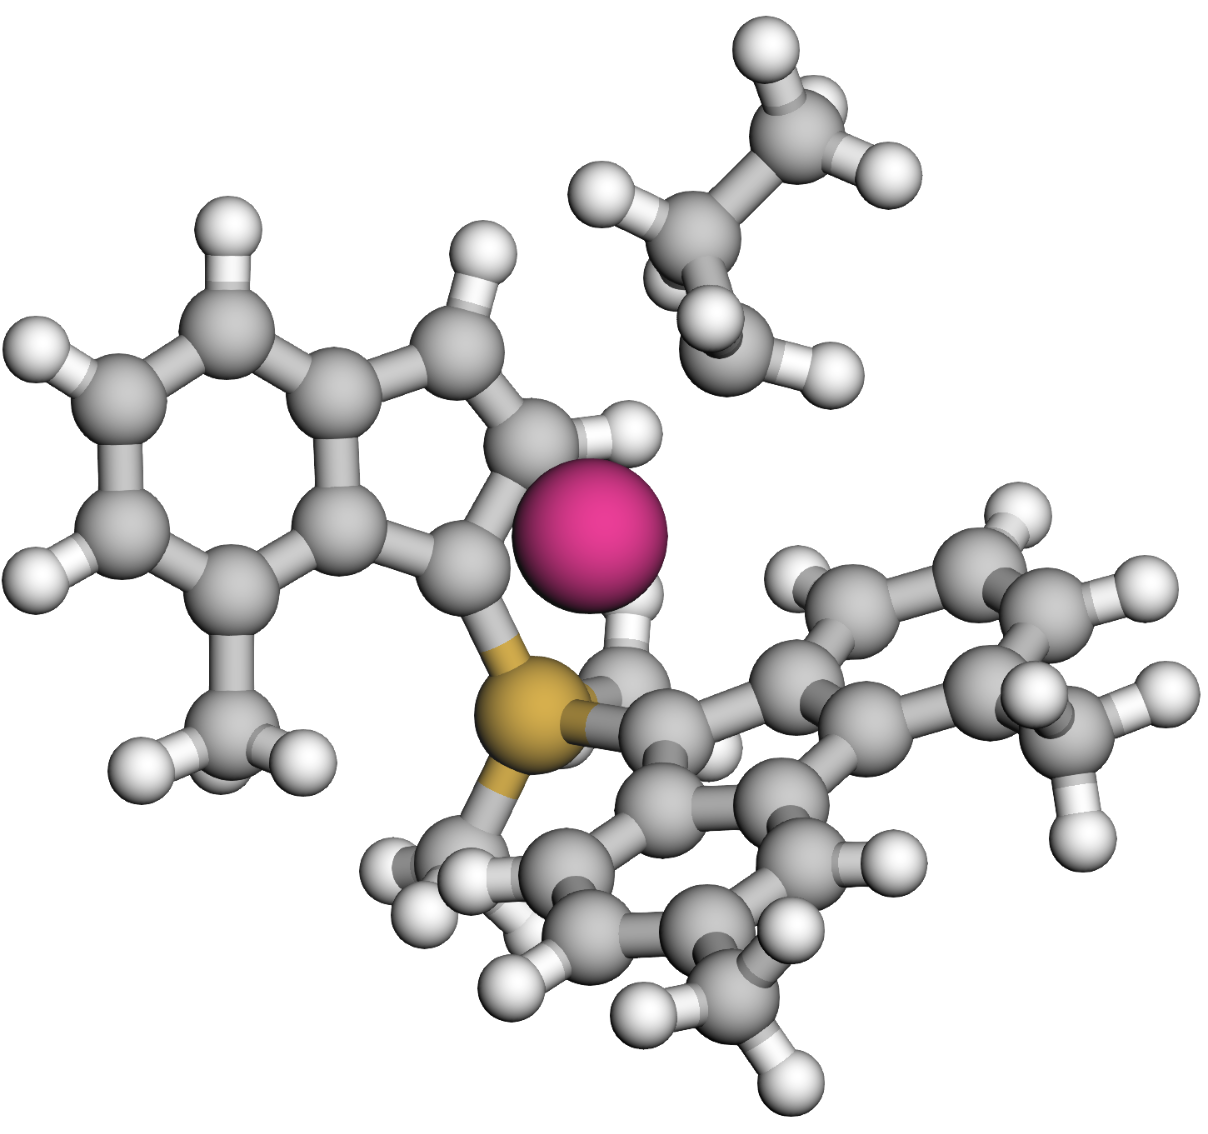 |
|  | 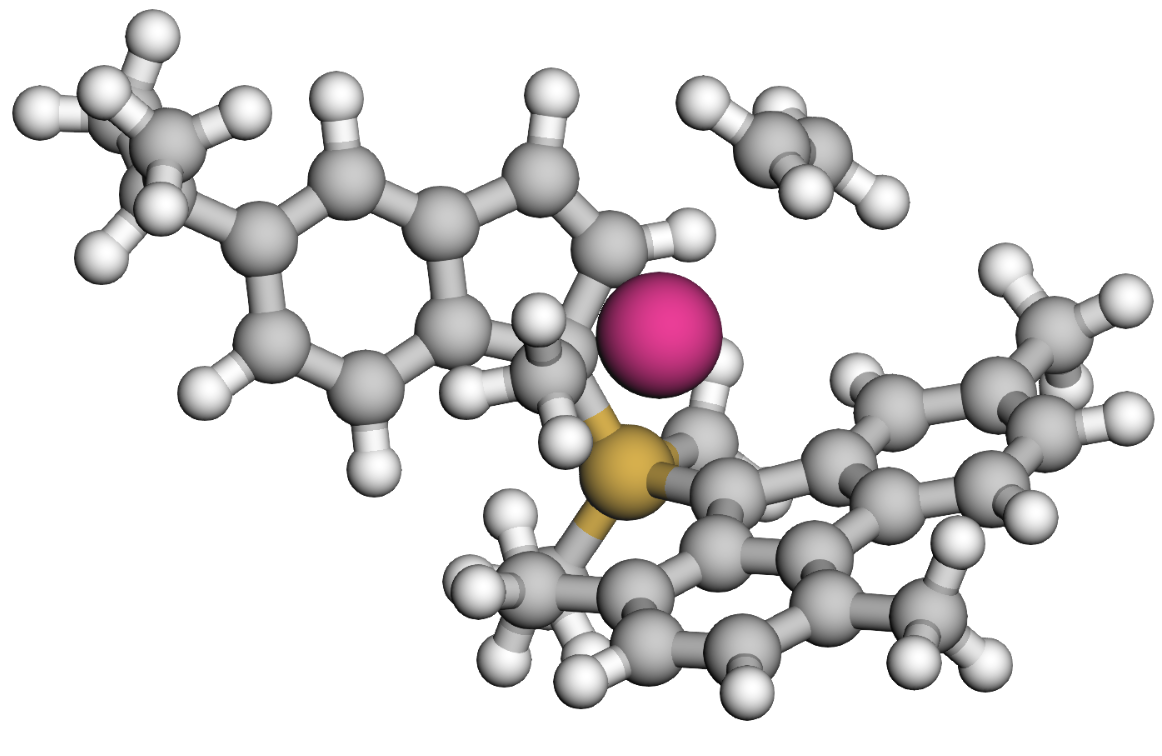 | 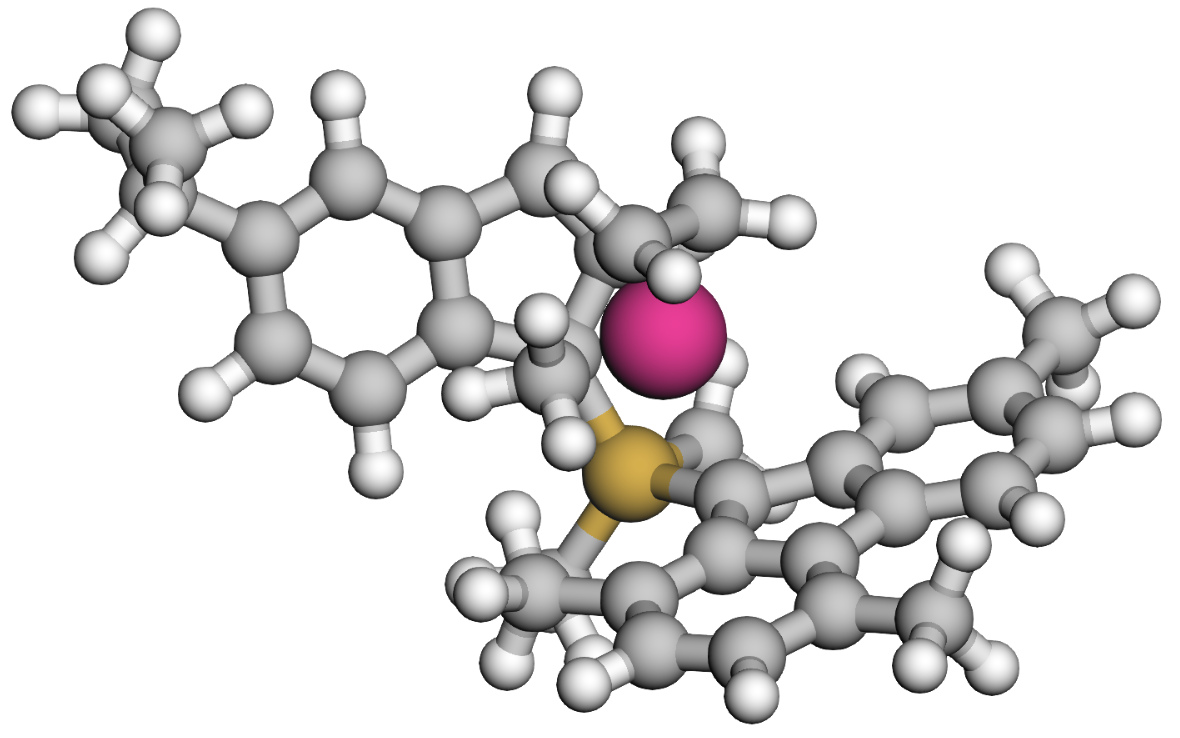 | 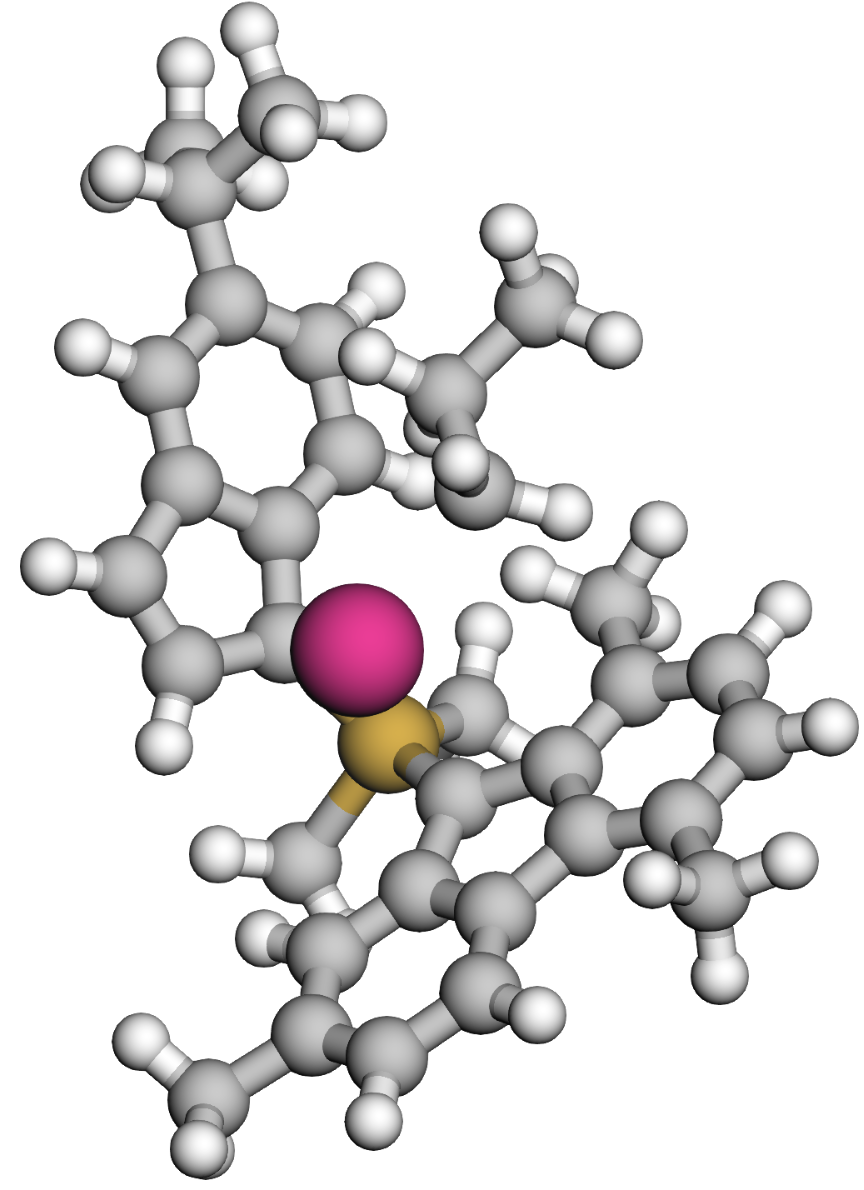 |
|  | 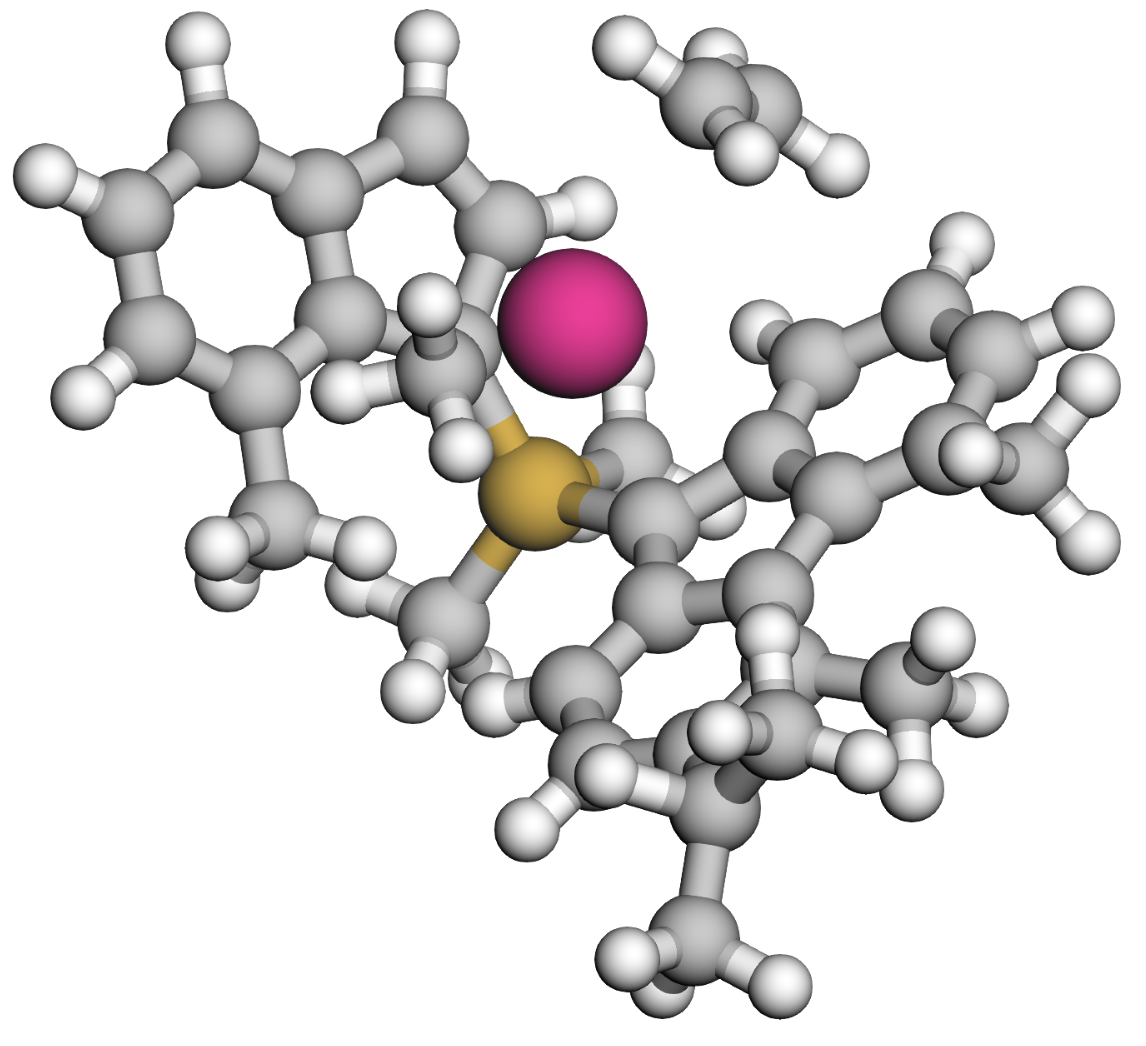 | 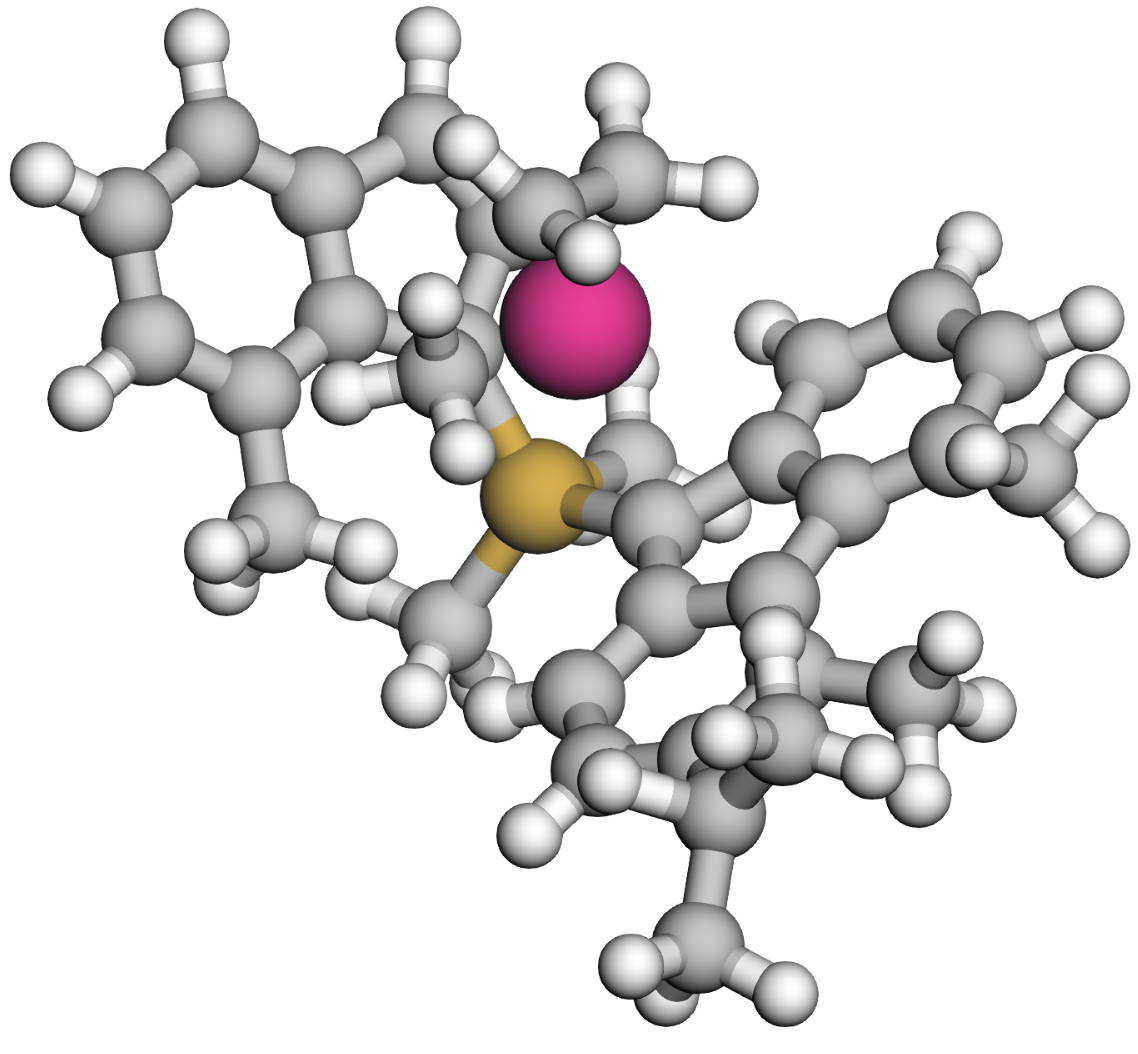 | 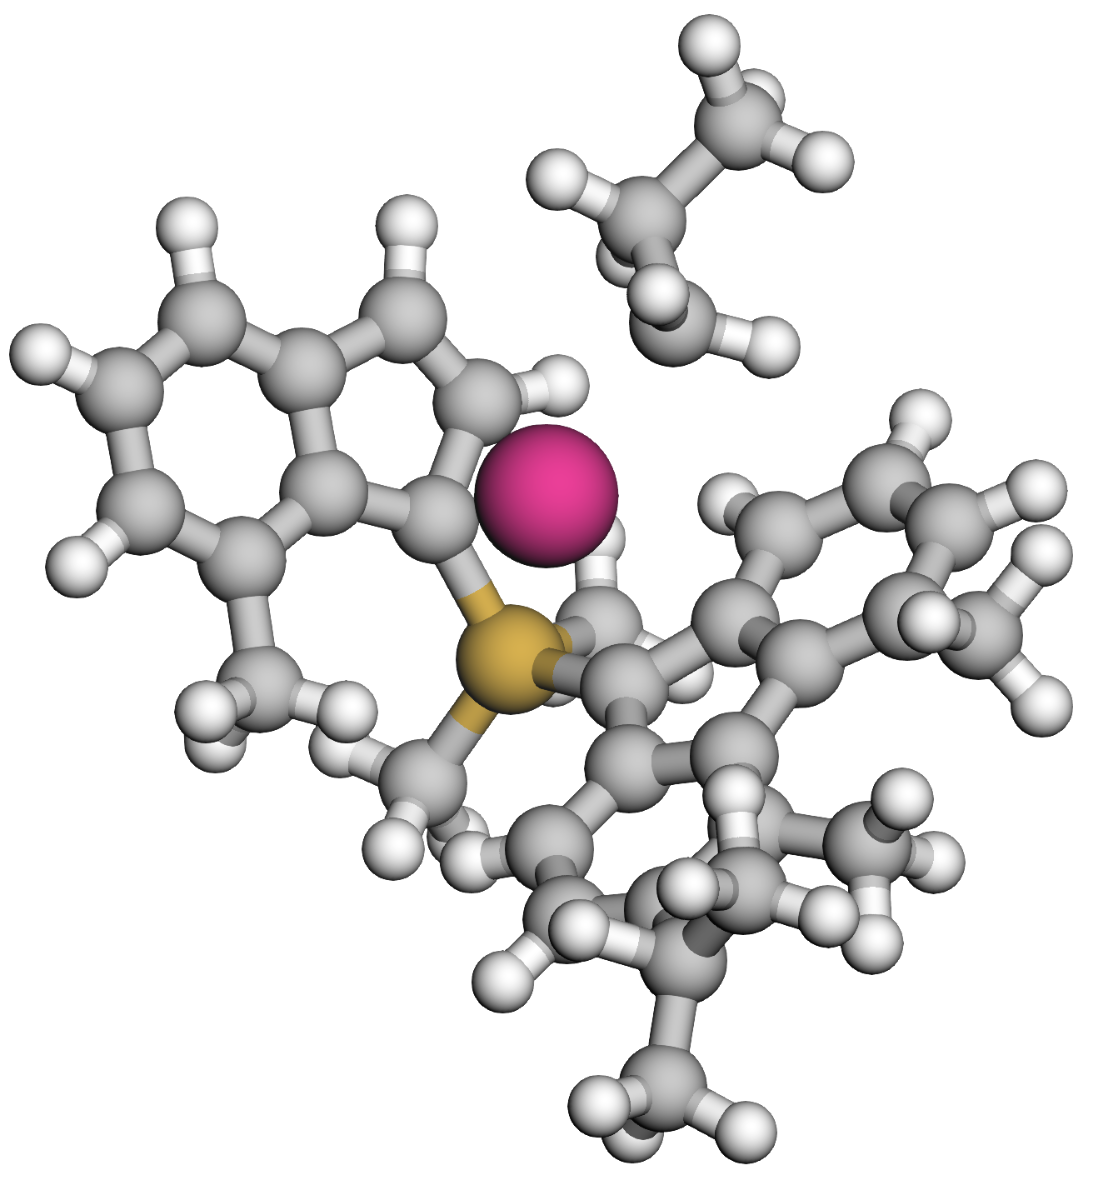 |

## Large-scale catalyst screening

**Supplementary Fig 10.** POE catalyst ligands with CatAI-predicted activity [104 kg/(mol·h)].

## Synthetic route of CPP-Zr

**Supplementary Fig 11.** Synthetic route of **CPP-Zr**.

Synthesis of the **L3**:

To the flask was added 2,7-di-tert-butyl-9H-fluorene (1.94 g, 6.96 mmol, 1 equiv.) and MTBE (8 mL). Under a nitrogen atmosphere in an ice-water bath, n-hexyllithium (2.2 M in hexane, 3.8 mL, 8.35 mmol, 1.2 equiv.) was added. The mixture was stirred at room temperature for 2 hours. Then cyclopenta-2,4-dien-1-ylidenecyclohexane (800 mg) was added and stirred at room temperature overnight. The reaction was quenched with EtOH (2 mL), and extracted with saturated aqueous ammonium chloride solution one time and ethyl acetate three times (3 × 10 mL). The organic phase was collected and dried over anhydrous sodium sulfate. Purification by column chromatography (eluted with pure petroleum ether) to afford 652 mg of **L3** (white solid), with a yield of 22%.

Synthesis of the **CPP-Zr**

In a glove box, to a 25 mL round-bottom flask was added the ligand (200 mg, 0.41 mmol, 1 equiv.) and nBu2O (2 mL). The mixture was cooled for 1 hour. Then n-hexyllithium (0.5 mL, 2.2 M in hexane) was added. The system was heated to 100 °C and stirred for 6 hours. After completion, the mixture was cooled to room temperature, and zirconium(IV) chloride (1.1 equiv.) was added. The mixture was stirred at room temperature for 1 hour, the reaction mixture was filtered and the cake was dissolved in toluene, evaporation of toluene under reduced pressure afforded 153 mg yellow solid, with a yield of 56%.The spectroscopic data ofall catalystsare as follows.

**Cat 1**, 1H NMR (400 MHz, C6D6) δ 7.39 (dt, *J* = 8.6, 1.1 Hz, 2H), 7.24 – 7.22 (m, 2H), 7.18 (d, *J* = 1.0 Hz, 2H), 7.14 (d, *J* = 1.0 Hz, 2H), 6.87 – 6.84 (m, 2H), 6.80 (dd, *J* = 3.3, 1.0 Hz, 2H), 5.76 (d, *J* = 3.3 Hz, 2H), 0.54 (s, 6H) ppm.

**Cat 2**, 1H NMR (400 MHz, C6D6) δ 7.28 (dt, *J* = 8.6, 1.1 Hz, 2H), 7.15 (d, *J* = 3.9 Hz, 4H), 7.11 – 7.07 (m, 2H), 6.91 (ddd, *J* = 8.6, 6.6, 1.0 Hz, 2H), 6.46 (dd, *J* = 3.3, 0.9 Hz, 2H), 5.75 (d, *J* = 3.4 Hz, 2H), 2.99 – 2.91 (m, 4H) ppm.


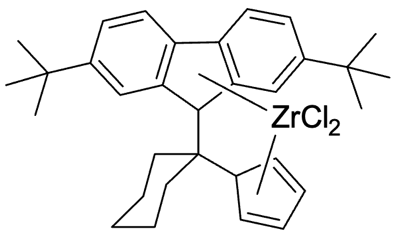


**CPP-Zr**, red solid, 153 mg, 56% yield. 1H NMR (400 MHz, C6D6) δ 8.04 (d, *J* = 8.8 Hz, 2H), 7.73 – 7.61 (m, 4H), 6.33 (t, *J* = 2.7 Hz, 2H), 5.68 (d, *J* = 2.7 Hz, 2H), 3.43 – 3.35 (m, 2H), 2.39 – 2.28 (m, 2H), 2.05 – 1.95 (m, 4H), 1.37 (s, 18H), 0.98 – 0.87 (m, 2H) ppm.


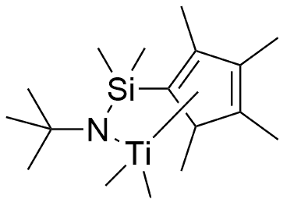


**CG-Ti**, 1H NMR (400 MHz, C6D6) δ 1.97 (s, 6H), 1.86 (s, 6H), 1.57 (s, 9H), 0.51 (s, 6H), 0.43 (s, 6H) ppm.


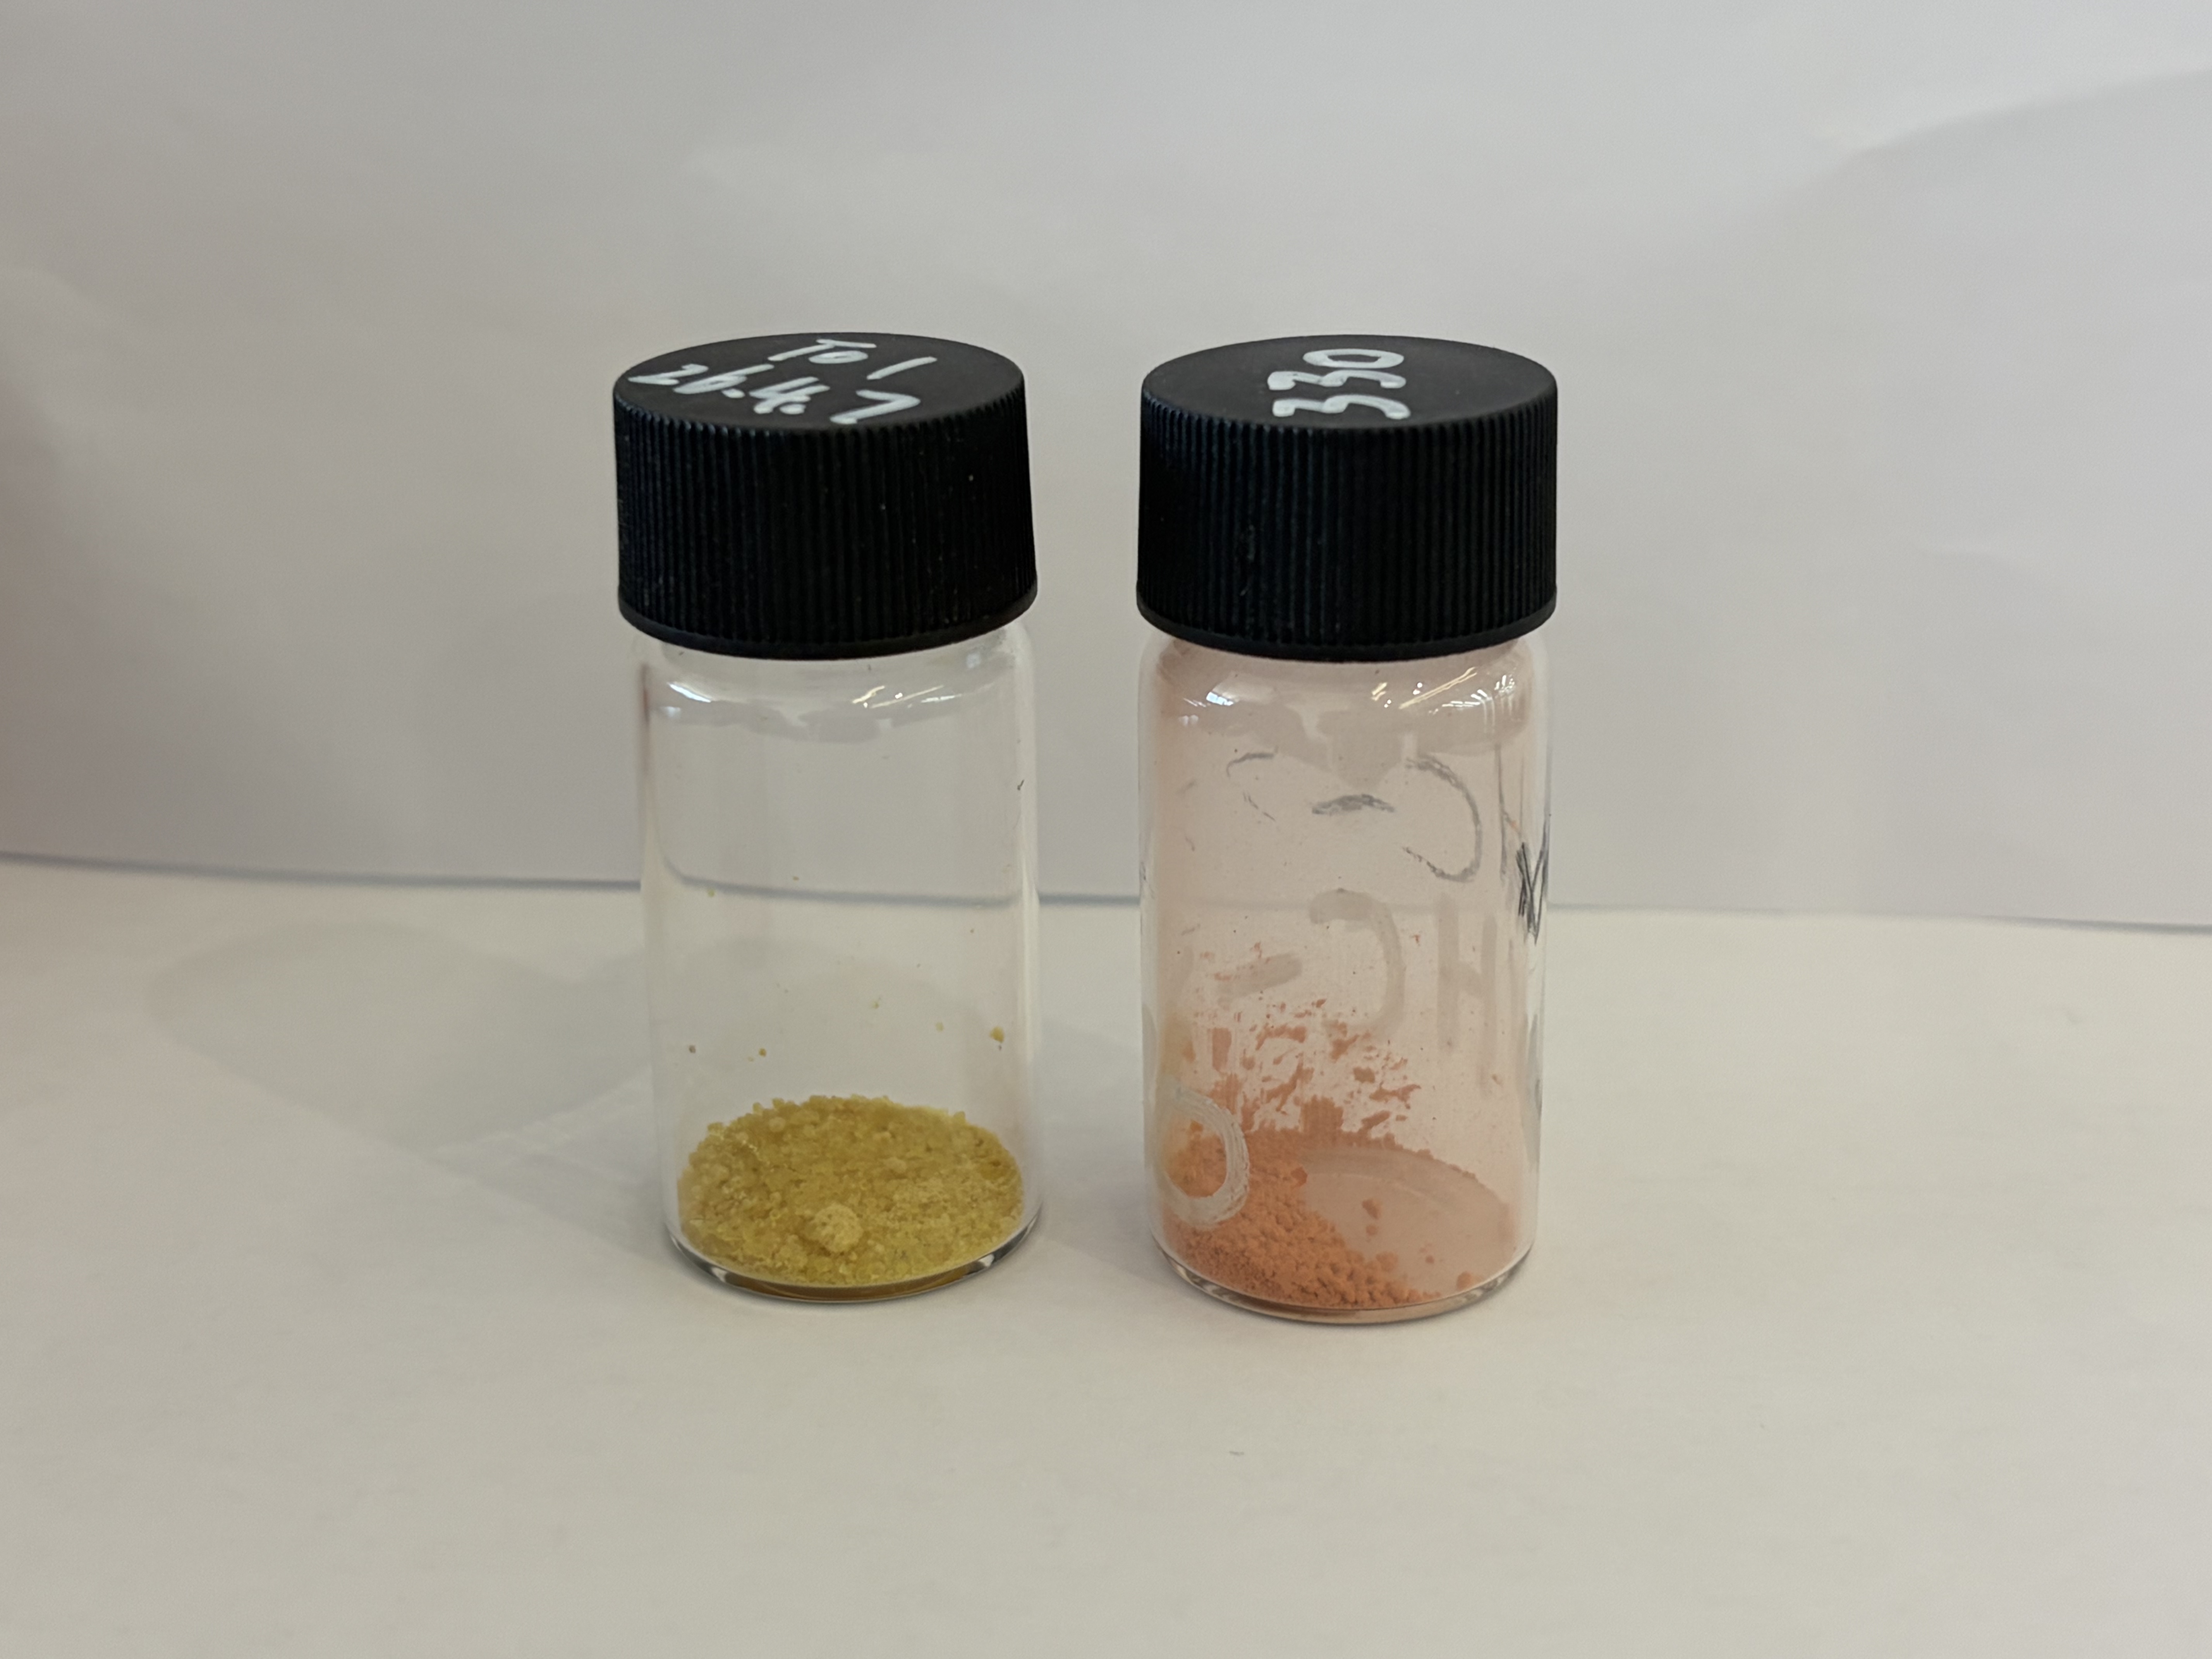


**Supplementary Fig 12.** Morphological comparison of **CG-Ti** (left) and **CPP-Zr** (right).

## Catalyst performance and polymer property

**Supplementary Table 34.** Performance comparison of CatAI-recommended catalysts with previously reported POE catalysts.

| Catalyst | Ownership | Metal | Experimental Catalyst activity **↑**  104 kg /(mol·h) |
| --- | --- | --- | --- |
| Homogeneous rac-Et(Ind)2ZrCl2/dMMAO | Open literature21 | Zr | 2.8 |
| SiO2(LP)-supported rac- Et(Ind)2ZrCl2/dMMAO | Open literature21 | Zr | 2.5 |
| SiO2(SP)-supported rac- Et(Ind)2ZrCl2/dMMAO | Open literature21 | Zr | 1.3 |
| Si-Al(BP)-supported rac- Et(Ind)2ZrCl2/dMMAO | Open literature21 | Zr | 0.5 |
| rac-Me2Si[2,4-Me2Ind]2ZrCl2 (EO-21, comparative C-1) | ExxonMobil patent literature22 | Zr | 9.9 |
| rac-Me2Si[2,4-Me2Ind]2ZrCl2 (EO-23, comparative C-1) | ExxonMobil patent literature22 | Zr | 23.3 |
| Dow INSITE/CGC direct-family benchmark | Dow22 | Ti | 4.6 |
| ExxonMobil metallocene-family public benchmark | ExxonMobil22 | Zr | 23.3 |
| Mitsui EVOLUE/TAFMER-like public benchmark | Mitsui Chemicals22 | Zr | 20.5 |
| **Cat 1** | CatAI-recommended | Zr | 55.2 |
| **Cat 2** | CatAI-recommended | Zr | 91.2 |
| **CPP-Zr** | CatAI-recommended | Zr | **194.4** |

**Supplementary Table 35.** Comparison of calculated and experimental catalyst activities.

| Catalyst | Calculated catalyst activity **↑**  104 kg/(mol·h) | Experimental catalyst activity **↑**  104 kg/(mol·h) |
| --- | --- | --- |
| **CG-Ti** | 47.9 | 21.6 |
| **Cat 1** | 82.8 | 55.2 |
| **Cat 2** | 125.6 | 91.2 |
| **CPP-Zr** | **169.2** | **194.4** |

**Supplementary Table 36. CPP-Zr** activity across reactor scales.

| Catalyst | Experimental catalyst activity **↑**  104 kg/(mol·h)  (scale: 20 mL) | Experimental catalyst activity **↑**  104 kg/(mol·h)  (scale: 2 L) |
| --- | --- | --- |
| **CPP-Zr** | **194.4** | **144.8** |


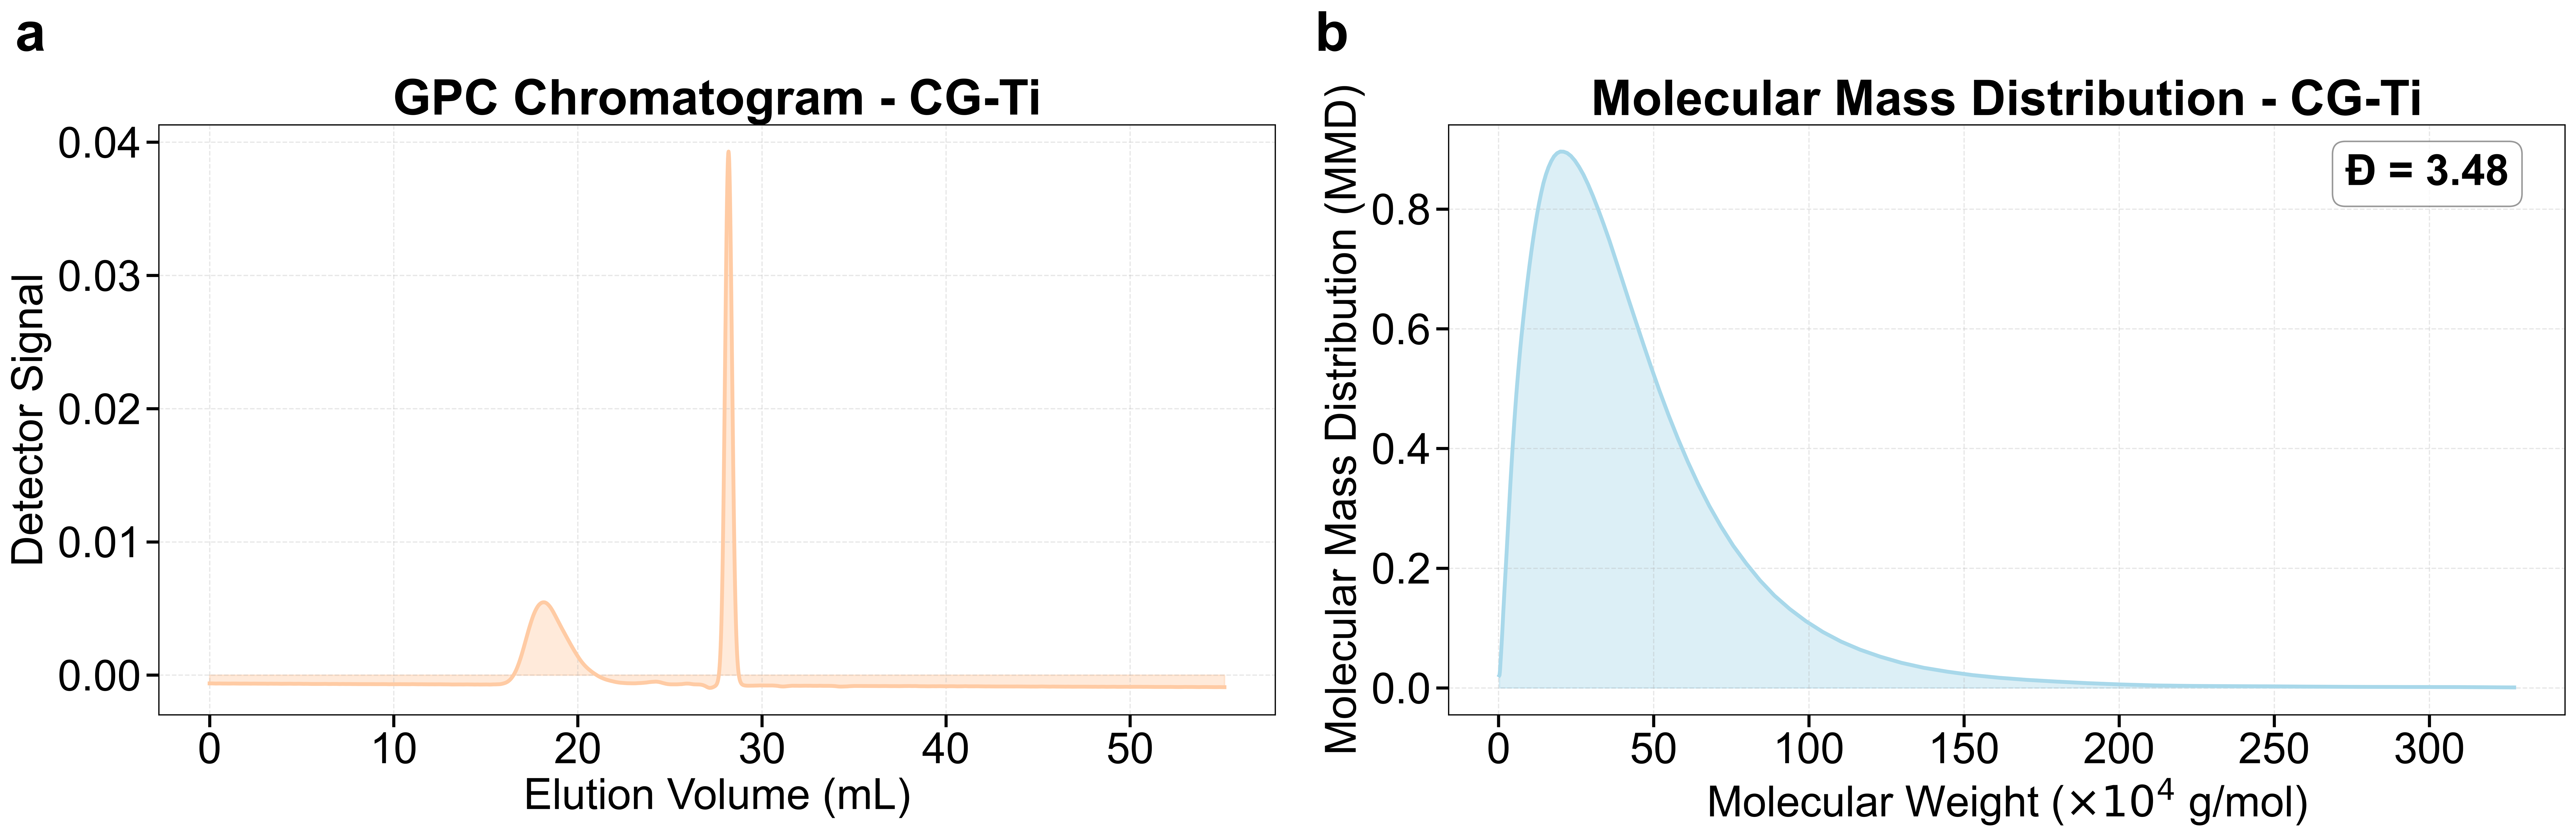


**Supplement Fig 13.** Molecular weight characterization of polymer synthesized with **CG-Ti**. (a) GPC chromatogram and (b) molecular weight distribution.


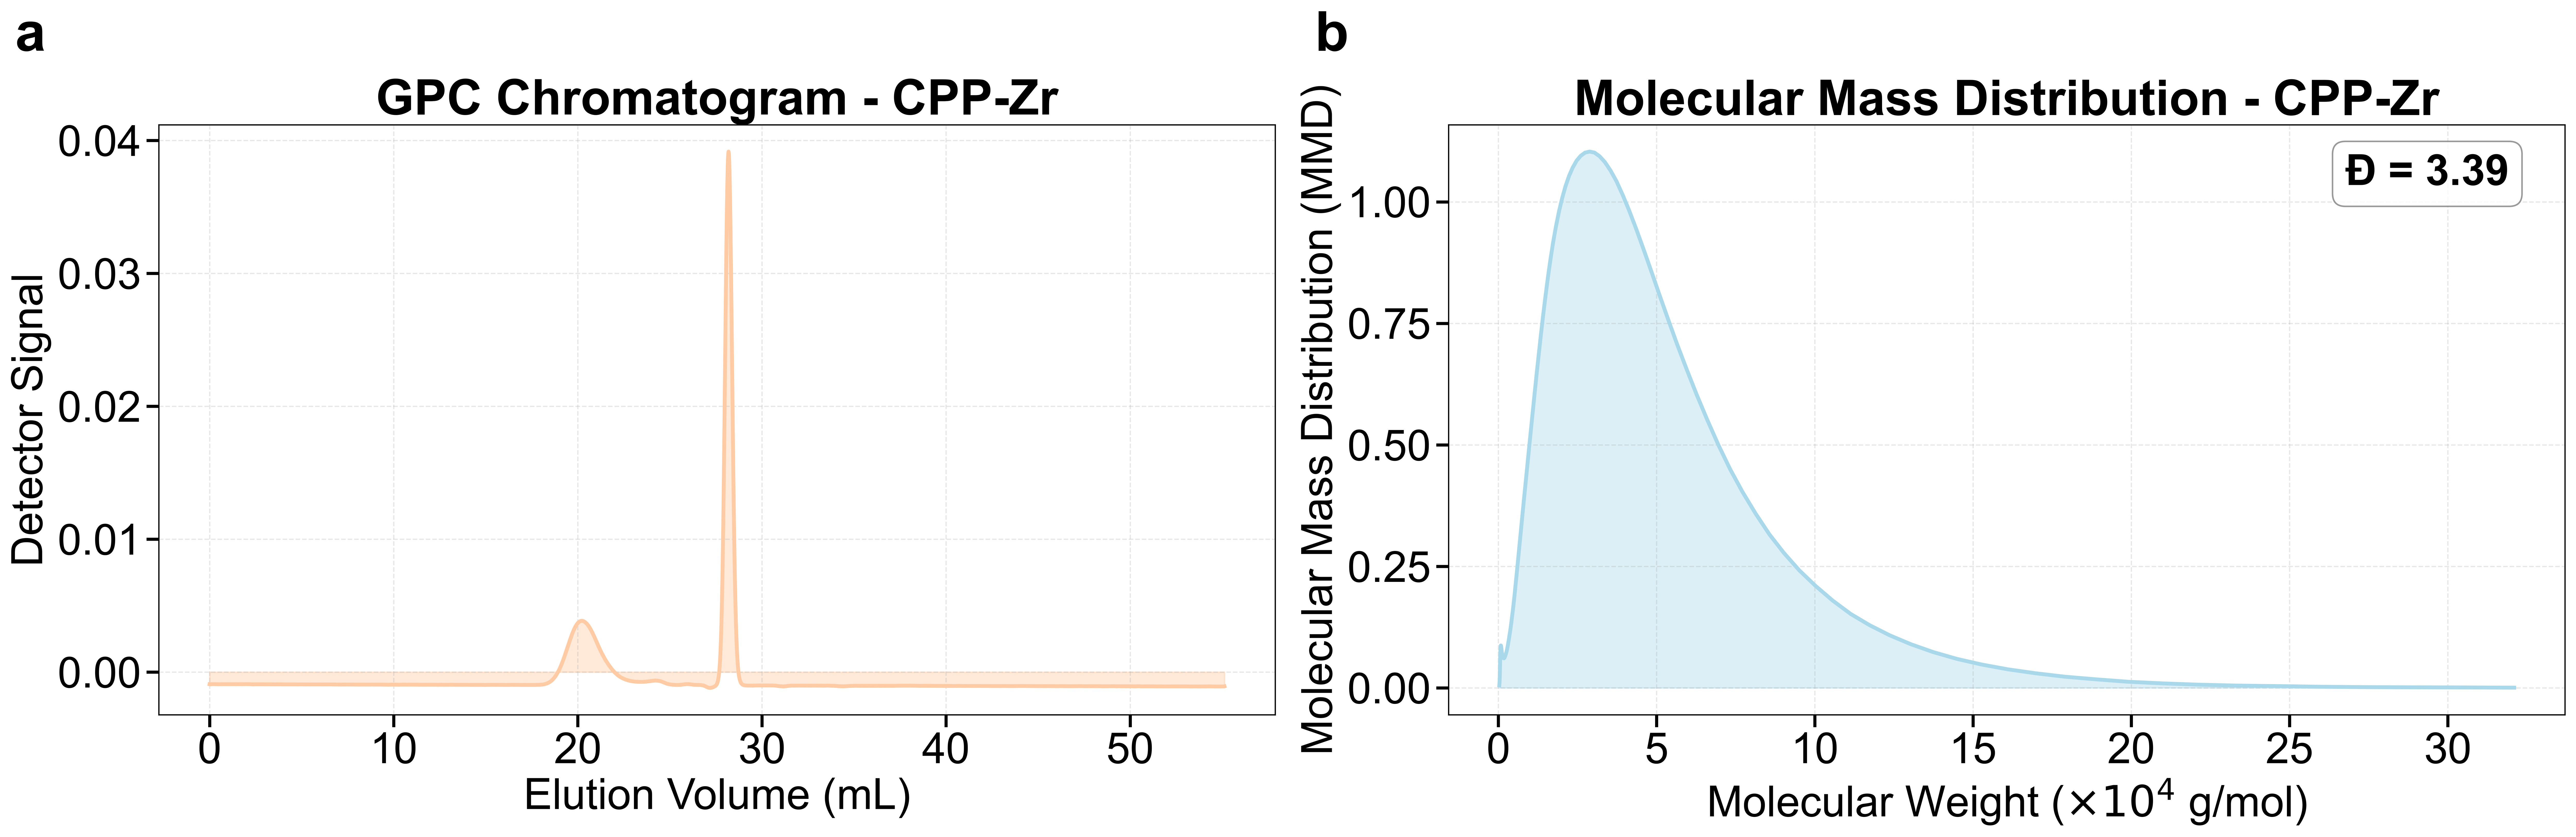


**Supplement Fig 14.** Molecular weight characterization of polymer synthesized with **CPP-Zr**. (a) GPC chromatogram and (b) molecular weight distribution.


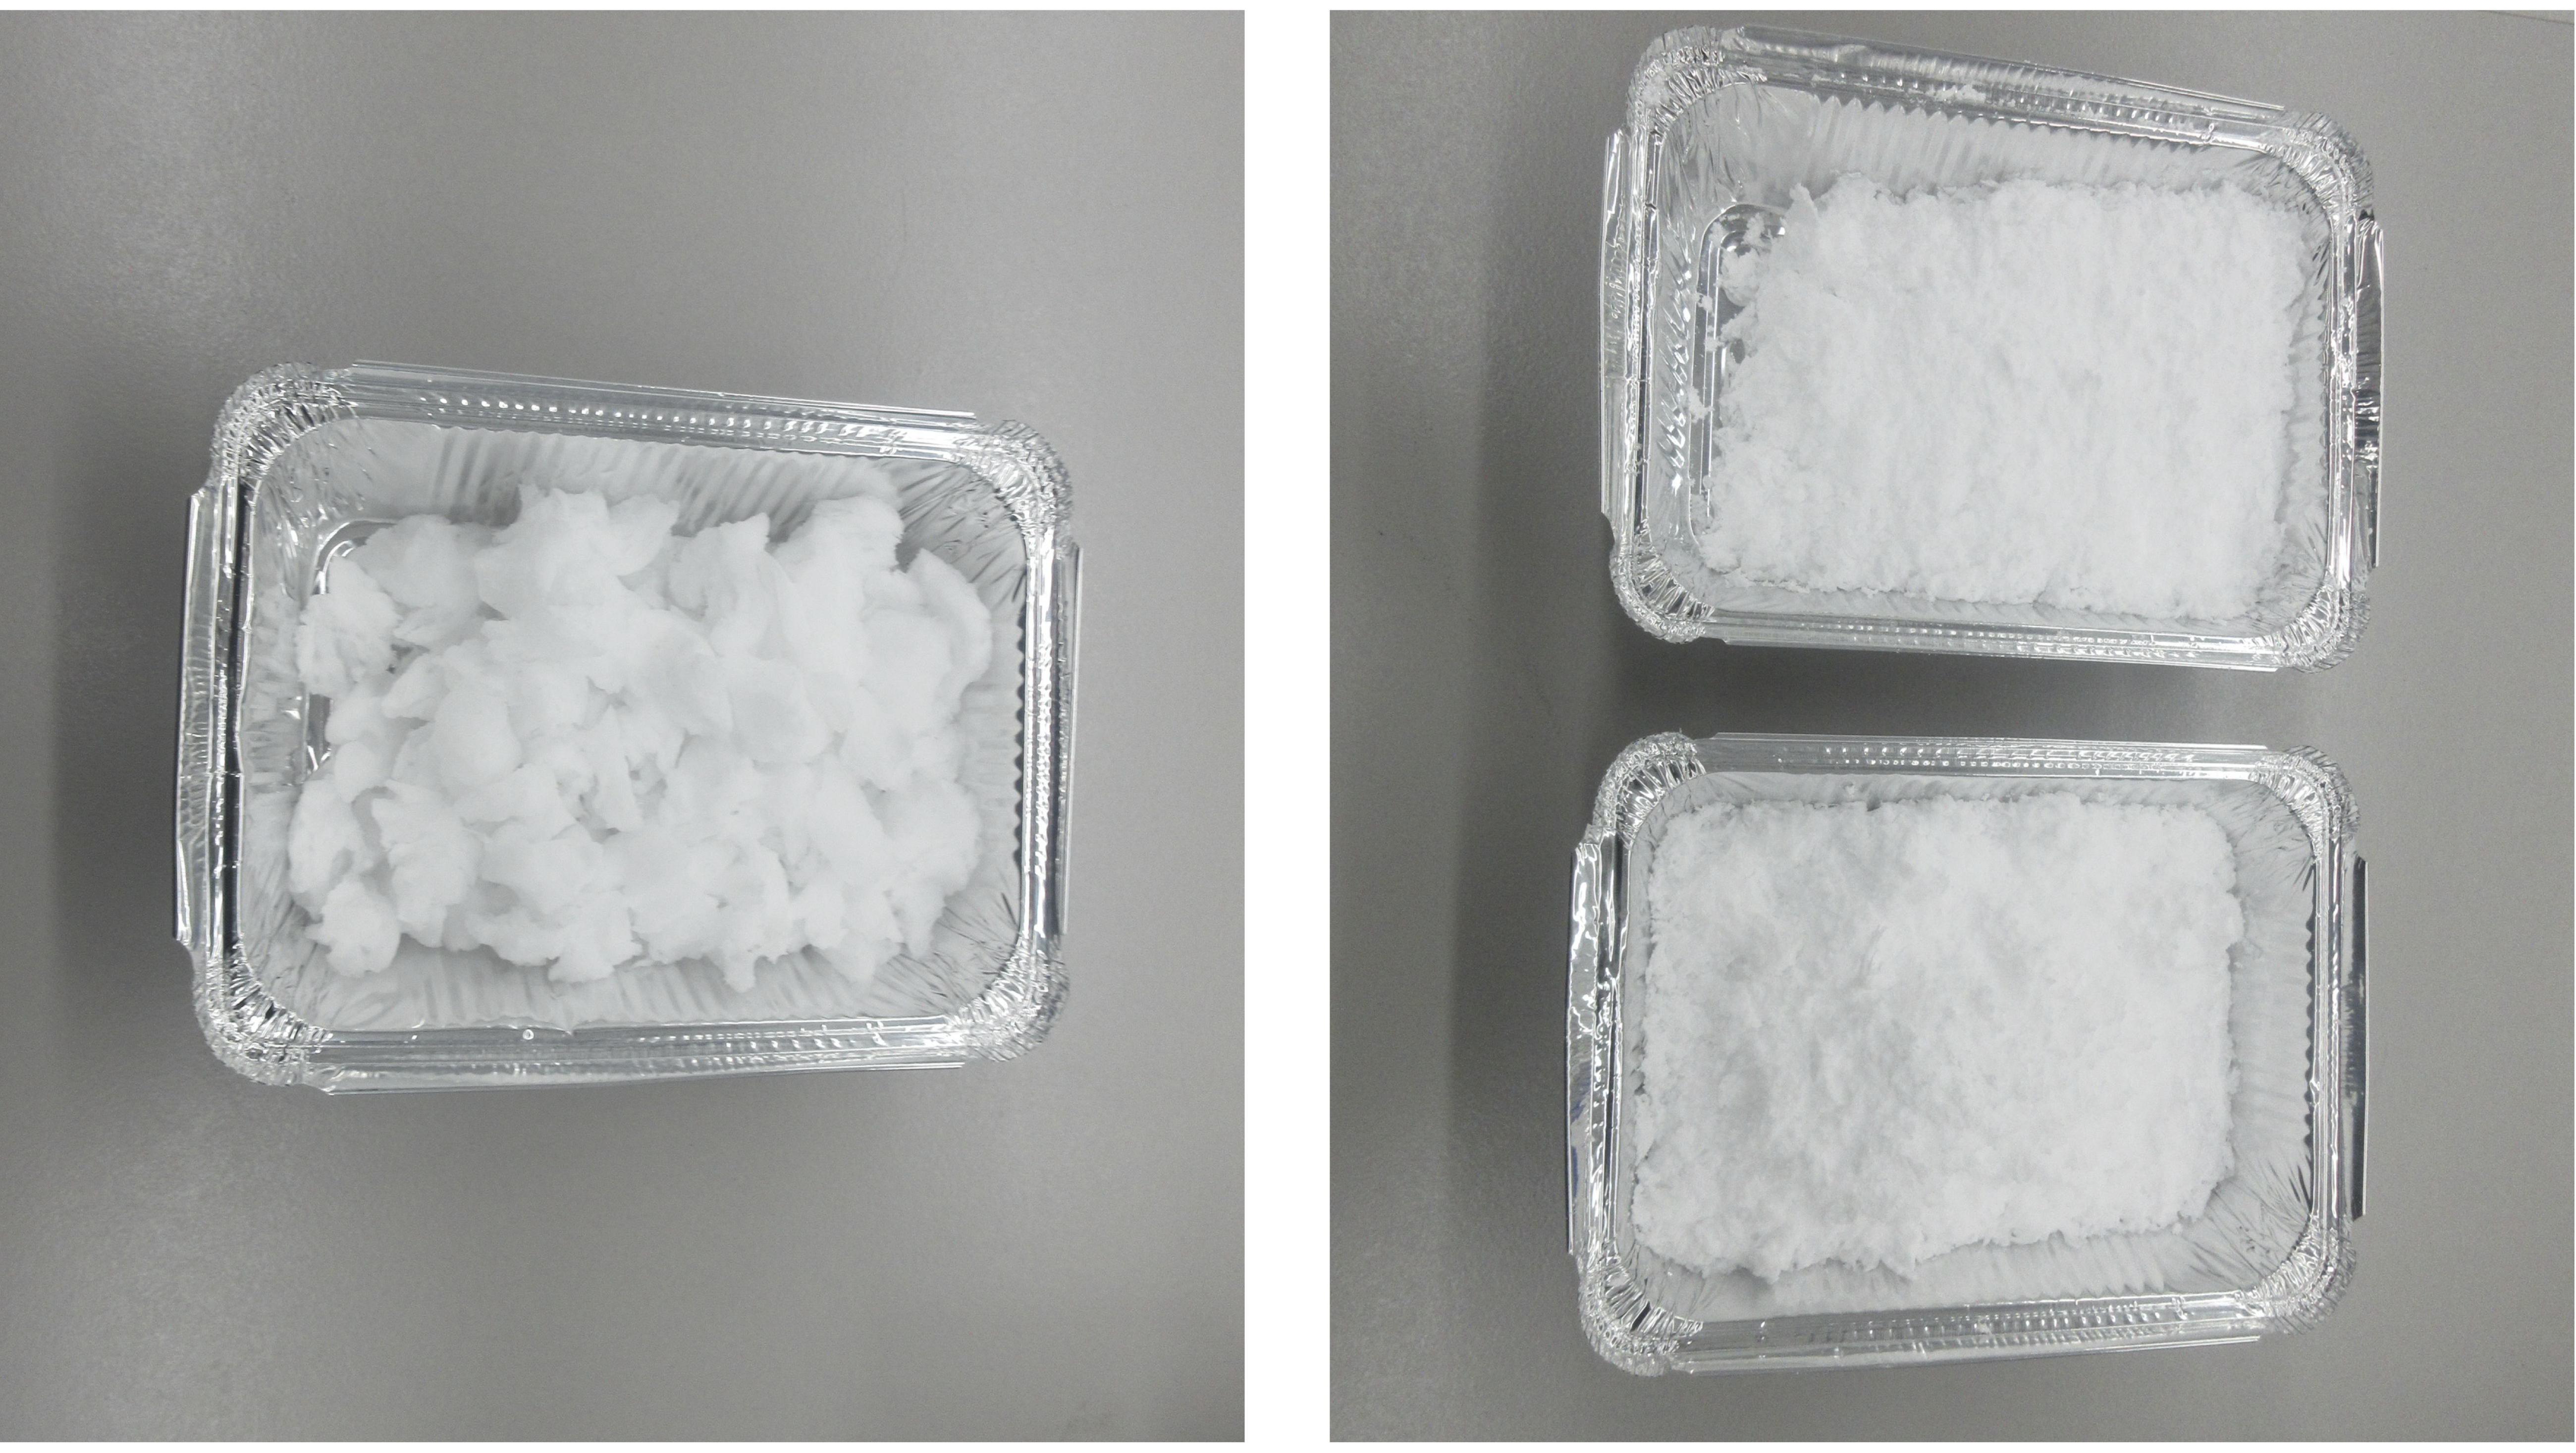


**Supplement Fig 15.** Macroscopic morphology of POE produced using **CG-Ti** (left) and **CPP-Zr** (right) catalysts.

# **Closed-Loop Optimization for Heterogeneous Photocatalytic C–O Coupling**

This section documents the closed-loop catalyst optimization campaign for heterogeneous photocatalytic C–O coupling. The workflow follows the standardized discovery pipeline: design-space definition through AI-assisted literature mining (**Section 4.1**), data initialization from a small expert-curated seed set, CatAI model architecture for catalyst-condition co-optimization (**Section 4.2**), and experimental validation comprising catalyst synthesis (**Section 4.3**), substrate scope evaluation (**Section 4.4**), performance comparison with representative heterogeneous catalysts (**Section 4.5**) and stability performance evaluation (**Section 4.6**).

## Design space definition by literature mining

We performed AI-assisted literature mining using a DeepSeek-based agent to enable high-throughput structured extraction of catalyst from cross coupling literature. Because this task required only categorical descriptors (metal identity and support type) rather than quantitative activity values, a lighter text-only extraction pipeline was sufficient and multimodal figure parsing was not necessary.

The workflow comprised two stages. First, articles matching the Boolean query ((cross coupling OR cross-coupling) AND (catalyst* OR catalyst OR catalysis)) were automatically retrieved in HTML format via the large language model agent and subsequently converted into structured JSON representations, in which embedded tables were rendered as Markdown to preserve tabular data for downstream parsing and figure captions were retained as separate text fields. Second, for each article the DeepSeek agent performed a two-pass analysis. In the first pass, an autonomous relevance classifier determined whether the manuscript described a catalyst-mediated coupling reaction within the predefined scope. In the second pass, the agent extracted catalyst-related entities—including catalysis type, coupling bond type, metal identity and support material—and normalized them into a unified JSON schema with controlled vocabularies and fixed keys. An automated self-audit was applied to the generated outputs, comprising JSON validity checks, schema compliance verification and internal consistency checks; entries failing validation were automatically regenerated until all constraints were satisfied.

After deduplication and normalization, this pipeline yielded 1790 metal entries and 214 support entries, which were subsequently used to delineate the accessible catalyst design space rather than for direct performance benchmarking.

## Model architecture for active learning framework


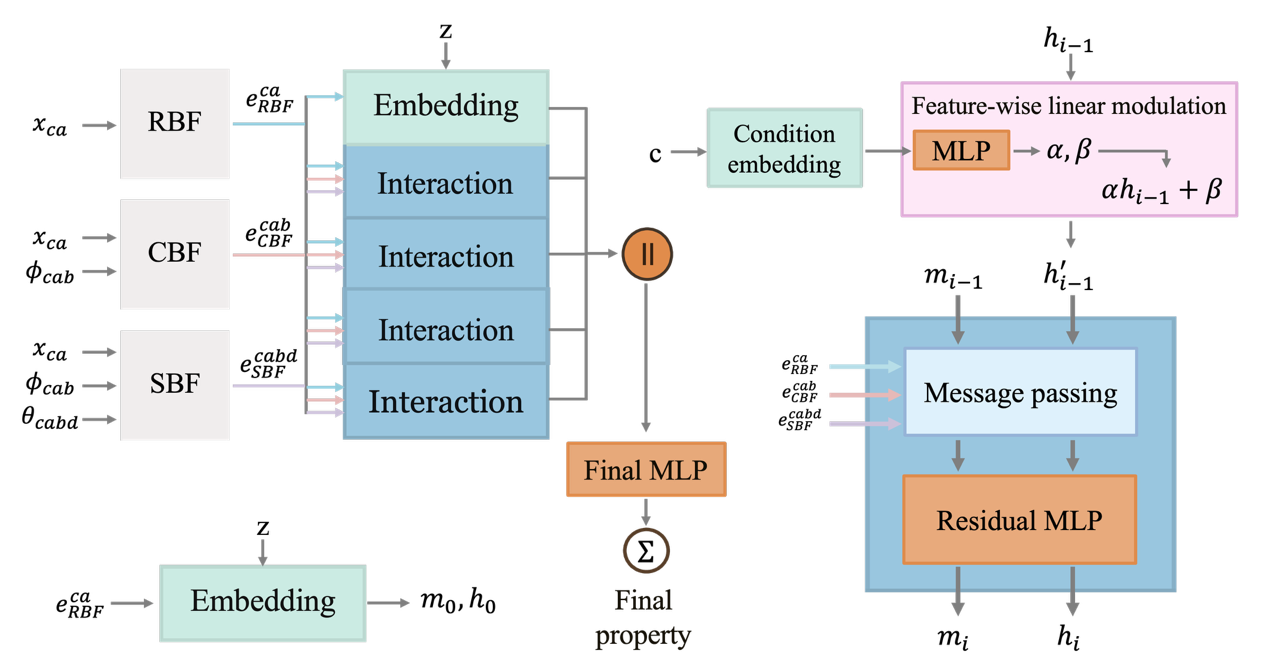


**Supplementary Fig 16.** Architecture of the condition-encoded model.

## Synthesis of optimized catalysts

The preparation of Cug/PCN followed a previously reported two-step annealing protocol23, CuCl2 (0.36 g) and exfoliated PCN (0.70 g) were dispersed in 200 mL formamide, sonicated for 10 min and then stirred in an oil bath (120 °C) for 12 h, following centrifugation and washing thoroughly by ethanol several times. The oven-dried powder (80 °C) was subsequently heated to 500 °C with a heating rate of 2 °C min-1 and kept for 5 h with the protection of N2 flow. Other heterogeneous single-atom catalysts were prepared according to the previously reported protocol24,25. Further details on catalyst synthesis and characterization, experimental setups, and the overall metallaphotocatalytic protocol are provided in the Supplementary Information (Materials and Methods).

## Substrate scope


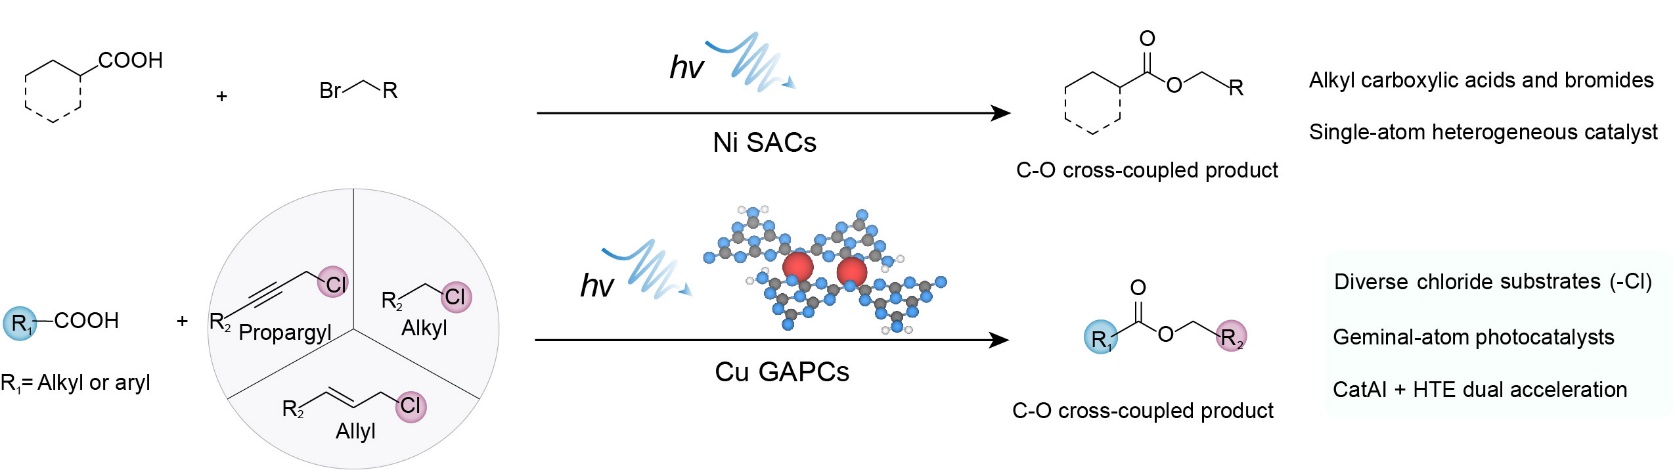


General Procedure: Cu GAPC (12.6·wt%, 5.0 mg, 10 mmol%), *N*-Boc-*L*-proline **1** (0.1 mmol, 23.2 mg), cinnamyl chloride **2** (22.8 mg, 0.15 mmol) and BTMG (34.2 mg, 0.2 mmol), DMSO (0.5 mL) and a magnetic stirrer bar were transferred into a 4 mL vial equipped with a screw-cap rubber septum, which in turn functioned as the batch photoreactor. All compounds were weighed using a high-throughput system manufactured by Huixiang inside an argon-filled glovebox. Photocatalytic batch experiments were irradiated for 12 h in a PhotoCubeTM reactor, and products were analyzed by 1H and 13C NMR spectroscopy. During system optimization, quantitative data on conversion and product selectivity were obtained by taking a 50 μL aliquot of the reaction mixture with tridecane as an internal standard, diluting with ethyl acetate, filtering, and analyzing by gas chromatography (GC). The synthesis of other products (**5**–**16**) was also carried out using this method or closely related procedures.

Spectroscopic data of **3**-**16** are as follows.

**1-(tert-butyl)-2-cinnamylpyrrolidine-1,2-dicarboxylate (±3)**26

Colorless oil, 29.8 mg, 90% yield. 1H NMR (400 MHz, CDCl3)δ 7.43 – 7.37 (m, 2H), 7.36 – 7.26 (m, 3H), 6.68 (dd, *J* = 15.9, 5.4 Hz, 1H), 6.42 – 6.24 (m, 1H), 4.91 – 4.67 (m, 2H), 4.33 (ddd, *J* = 44.7, 8.6, 3.8 Hz, 1H), 3.64 – 3.34 (m, 2H), 2.32 – 2.14 (m, 1H), 2.05 – 1.85 (m, 3H), 1.44 (d, *J* = 29.2 Hz, 9H) ppm.

**3-phenylprop-2-yn-1-yl ((tert-butoxycarbonyl)oxy)prolinate (±5)**

Colorless oil, 29.4 mg, 85% yield. 1H NMR (400 MHz, CDCl3)δ 7.37 (d, *J* = 6.1 Hz, 2H), 7.25 (tq, *J* = 9.1, 6.1, 4.8 Hz, 3H), 4.99 – 4.77 (m, 2H), 4.27 (ddd, *J* = 57.5, 8.6, 4.0 Hz, 1H), 3.55 – 3.27 (m, 2H), 2.23 – 2.10 (m, 1H), 1.99 – 1.76 (m, 3H), 1.37 (d, *J* = 31.8 Hz, 9H) ppm. 13C NMR (101 MHz, CDCl3) δ 172.63, 172.35, 154.45, 153.79, 131.91, 131.90, 128.85, 128.72, 128.32, 128.28, 122.24, 122.07, 86.67, 86.58, 82.82, 82.72, 80.09, 79.92, 59.04, 58.76, 53.37, 53.16, 46.60, 46.34, 30.88, 29.86, 28.44, 28.29, 24.34, 23.67 ppm.

**2-benzyl 1-(tert-butyl) pyrrolidine-1,2-dicarboxylate (±7)**27

Colorless oil, 28.1 mg, 92% yield. 1H NMR (400 MHz, CDCl3) δ 7.28 (d, *J* = 4.5 Hz, 5H), 5.20 – 4.97 (m, 2H), 4.25 (ddd, *J* = 49.1, 8.6, 3.6 Hz, 1H), 3.54 – 3.22 (m, 2H), 2.23 – 2.04 (m, 1H), 1.95 – 1.72 (m, 3H), 1.33 (d, *J* = 46.2 Hz, 9H) ppm.

**1-(tert-butyl) 2-(3-phenylpropyl) pyrrolidine-1,2-dicarboxylate (±9)**26

Colorless oil, 28.0 mg, 84% yield. 1H NMR (400 MHz, CDCl3)δ 7.26 – 7.20 (m, 2H), 7.15 (td, *J* = 7.1, 1.7 Hz, 3H), 4.38 – 4.06 (m, 3H), 3.51 – 3.23 (m, 2H), 2.88 (t, *J* = 7.0 Hz, 2H), 2.15 – 1.99 (m, 1H), 1.83 – 1.40 (m, 5H), 1.35 (d, *J* = 30.5 Hz, 9H) ppm.

**cinnamyl 2-acetoxybenzoate (10)**

Yellow solid, 21.9 mg, 74% yield. 1H NMR (400 MHz, CDCl3)δ 8.00 (dd, *J* = 7.9, 1.7 Hz, 1H), 7.53 – 7.48 (m, 1H), 7.35 (d, *J* = 7.2 Hz, 2H), 7.26 (q, *J* = 6.8, 6.3 Hz, 3H), 7.21 (d, *J* = 7.1 Hz, 1H), 7.05 (d, *J* = 8.0 Hz, 1H), 6.66 (d, *J* = 15.8 Hz, 1H), 6.30 (dt, *J* = 15.8, 6.5 Hz, 1H), 4.87 (d, *J* = 6.5 Hz, 2H), 2.26 (s, 3H) ppm. 13C NMR (101 MHz, CDCl3) δ 169.76, 164.37, 150.66, 136.11, 134.66, 133.96, 131.92, 128.68, 128.21, 126.67, 126.09, 123.84, 123.35, 122.84, 65.76, 21.08 ppm.

**cinnamyl 2-(4-isobutylphenyl)propanoate (11)**28

Yellow solid, 28.4 mg, 88% yield. 1H NMR (400 MHz, CDCl3)δ 7.39 – 7.31 (m, 4H), 7.32 – 7.25 (m, 3H), 7.15 (d, *J* = 8.1 Hz, 2H), 6.56 (d, *J* = 15.9 Hz, 1H), 6.26 (dt, *J* = 15.9, 6.1 Hz, 1H), 4.77 (d, *J* = 6.1 Hz, 2H), 3.79 (q, *J* = 7.1 Hz, 1H), 2.50 (d, *J* = 7.1 Hz, 2H), 1.89 (dq, *J* = 13.5, 6.8 Hz, 1H), 1.56 (d, *J* = 7.1 Hz, 3H), 0.94 (d, *J* = 6.6 Hz, 6H) ppm. 13C NMR (101 MHz, CDCl3) δ 174.52, 140.62, 137.74, 136.30, 133.63, 129.40, 128.58, 127.98, 127.26, 126.60, 123.27, 65.09, 45.22, 45.08, 30.21, 22.44, 18.60 ppm.

**cinnamyl (*S*)-2-(6-methoxynaphthalen-2-yl)propanoate (12)**

Yellow solid, 31.9 mg, 92% yield. 1H NMR (400 MHz, CDCl3)δ 7.80 – 7.69 (m, 3H), 7.48 (dd, *J* = 8.4, 1.9 Hz, 1H), 7.30 – 7.24 (m, 2H), 7.22 – 7.12 (m, 2H), 6.52 (d, *J* = 15.9 Hz, 1H), 6.25 (dt, *J* = 15.9, 6.2 Hz, 1H), 4.78 (d, *J* = 6.2 Hz, 2H), 3.97 – 3.92 (m, 1H), 3.95 (s, 3H), 1.65 (d, *J* = 7.1 Hz, 3H) ppm. 13C NMR (101 MHz, CDCl3) δ 174.44, 157.70, 136.22, 135.68, 133.78, 133.76, 129.35, 128.99, 128.56, 127.99, 127.24, 126.59, 126.32, 126.06, 123.16, 119.03, 105.63, 65.20, 55.34, 45.54, 18.58 ppm.

**cinnamyl 2-hydroxybenzoate (13)**29

Yellow solid, 17.5 mg, 69% yield. 1H NMR (400 MHz, CDCl3)δ 10.70 (s, 1H), 7.82 (dd, *J* = 8.0, 1.8 Hz, 1H), 7.38 (ddd, *J* = 8.7, 7.2, 1.8 Hz, 1H), 7.35 (d, *J* = 8.1 Hz, 2H), 7.26 (t, *J* = 7.6 Hz, 2H), 7.20 (t, *J* = 7.3 Hz, 1H), 6.91 (d, *J* = 8.3 Hz, 1H), 6.84 – 6.78 (m, 1H), 6.68 (d, *J* = 15.9 Hz, 1H), 6.31 (dt, *J* = 15.9, 6.5 Hz, 1H), 4.93 (dd, *J* = 6.5, 1.4 Hz, 2H) ppm.

**Caffeic Acid Cinnamyl Ester (16)**30

Yellow solid, 15.4 mg, 52% yield. 1H NMR (400 MHz, CDCl3)δ 7.52 (d, *J* = 16.0 Hz, 1H), 7.29 – 7.24 (m, 5H), 7.03 (s, 1H), 6.99 (d, *J* = 8.4 Hz, 1H), 6.83 (d, *J* = 8.4 Hz, 1H), 6.64 (d, *J* = 5.2 Hz, 1H), 6.61 – 6.59 (m, 1H), 6.35 (s, 1H), 6.31 (d, *J* = 7.8 Hz, 1H), 4.73 (d, *J* = 6.5 Hz, 2H) ppm.

## Catalyst performance comparison


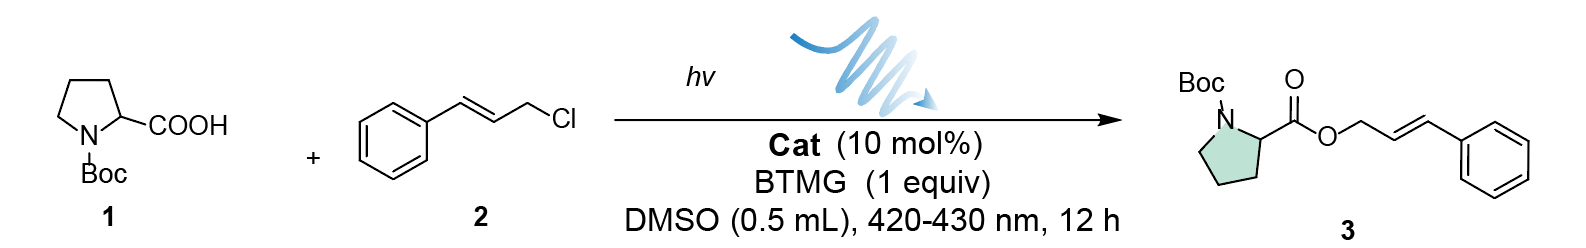

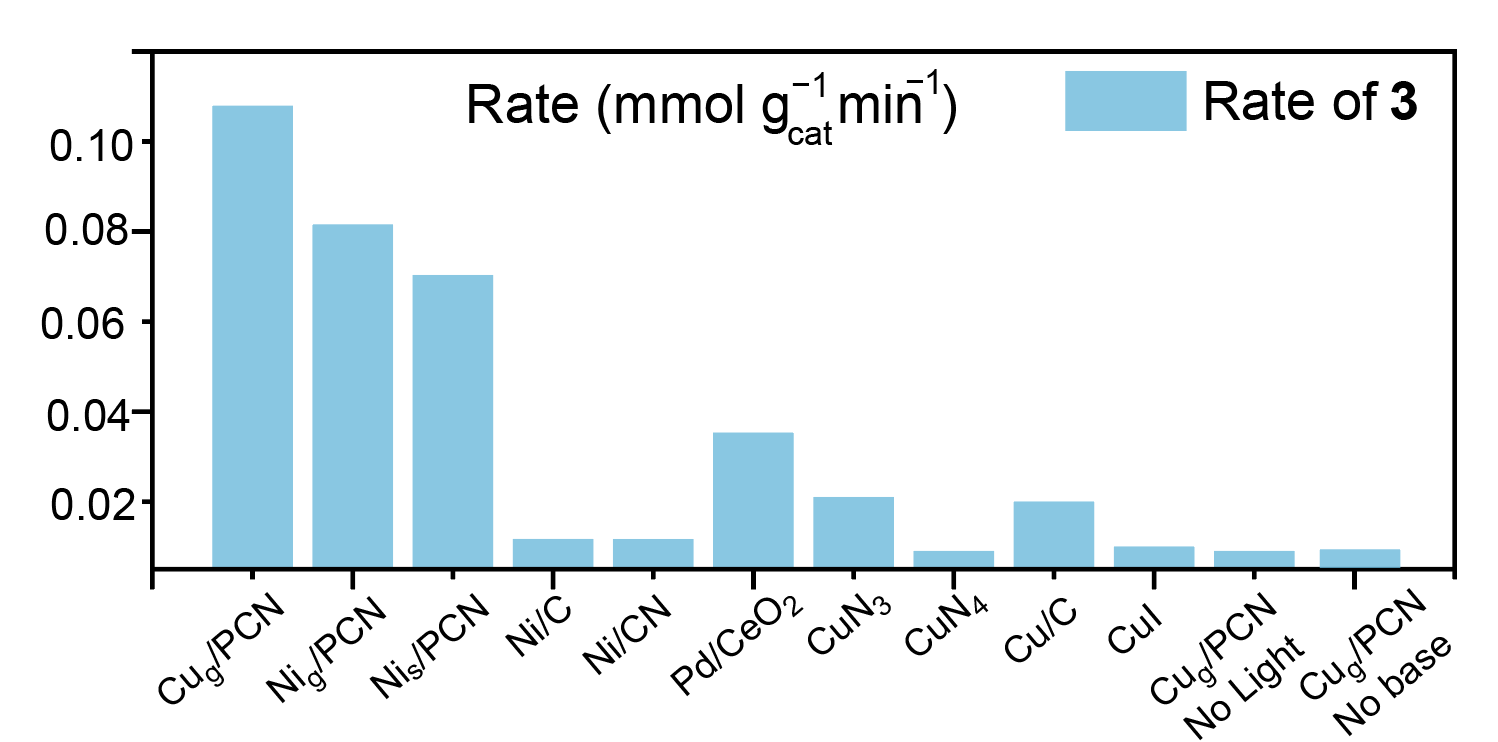


**Supplementary Fig 17.** Catalyst performance comparison.

Reaction conditions: *N*-Boc-*L*-proline **1** (0.1 mmol, 23.2 mg), cinnamyl chloride (22.8 mg, 0.15 mmol), BTMG (34.2 mg, 0.2 mmol), Cat (10 mmol%), DMSO (0.5 mL) Photocatalytic batch experiments were irradiated (420-430 nm) for 12 h using a PhotoCubeTM reactor.

## Catalyst stability performance


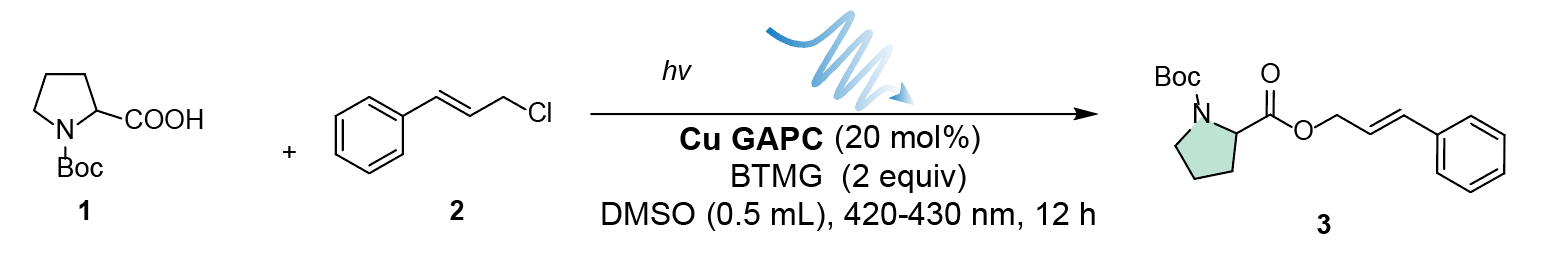


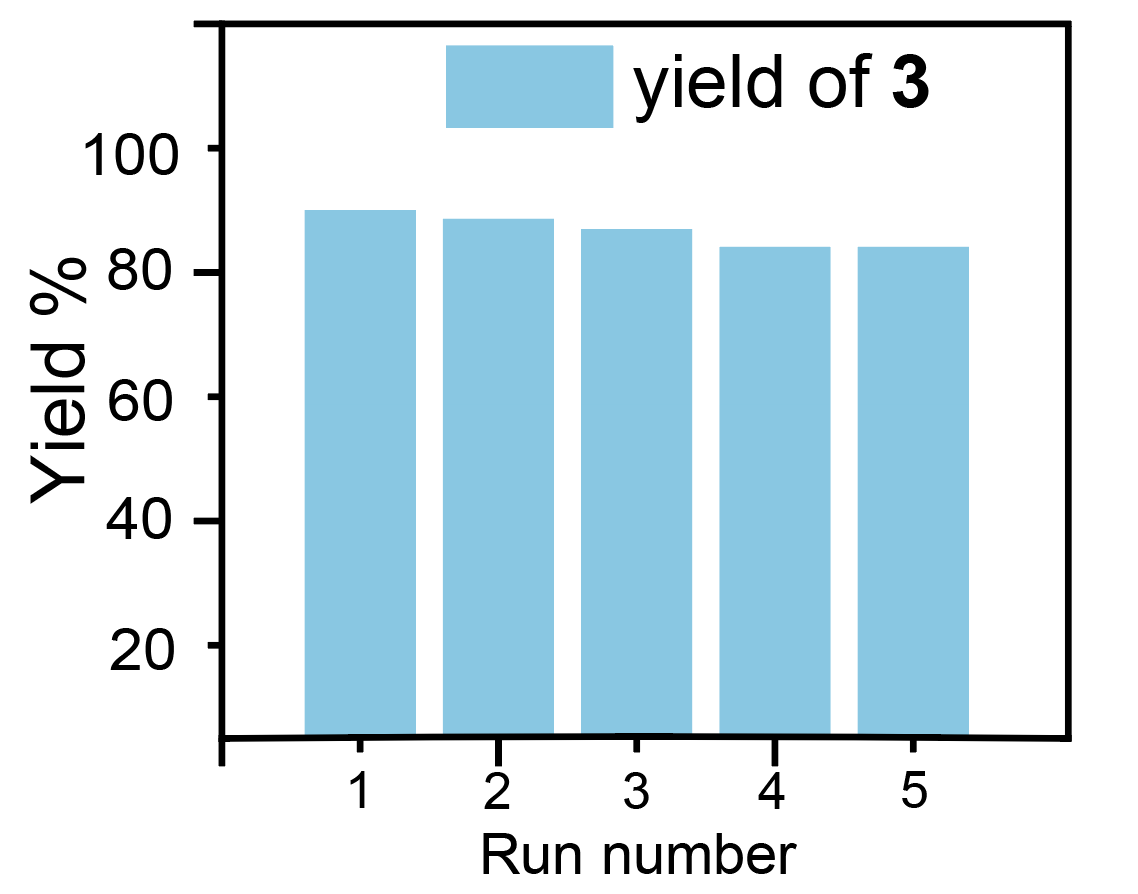


**Supplementary Fig 18.** Recycling experiment.

Reaction conditions: *N*-Boc-*L*-proline **1** (1 mmol, 232 mg), cinnamyl chloride (228 mg, 1.5 mmol), BTMG (342 mg, 2 mmol), Cu GAPC (20.0 mmol%), DMSO (4 mL) Photocatalytic batch experiments were irradiated (420-430 nm) for 12 h using a PhotoCubeTM reactor.

# Extensibility: Extensible Learning, Life-Cycle Analysis, and Community Platform

This section documents the extensibility of CatAI across three aspects: extensible learning with progressively expanded property modules (**Section 5.1**), life cycle analysis comparing commercial and CatAI designed POE catalysts (**Section 5.2**), and a community platform for catalyst property prediction and usage (**Section 5.3**).

## Extensibility of CatAI

**Supplementary Table 37.** Properties introduced with each five-module increment in the extensible learning experiment.

| Index | Property 1 | Property 2 | Property 3 | Property 4 | Property 5 |
| --- | --- | --- | --- | --- | --- |
| 0→5 | p-type electrical conductivity | HOMO–LUMO gap | QMOF band gap | n-type electrical conductivity | CEPDB power conversion efficiency |
| 5→10 | QMOF total energy | DOS Fermi level | OQMD ΔE (hull) | OQMD stability label | OPMD band gap |
| 10→15 | Surface energy | Activation energy barrier | Gibbs free energy | Electronic energy | Metal partial charge |
| 15→20 | Castelli formation energy | JARVIS band gap | JARVIS formation energy | JARVIS total energy | Single atom catalyst adsorption energy |
| 20→25 | MP Fermi level | n-type thermal conductivity | MP energy above hull | MP band gap | p-type thermal conductivity |
| 25→30 | MP formation energy | JARVIS shear modulus (VRH) | JARVIS bulk modulus (VRH) | MP shear modulus (VRH) | MP bulk modulus (VRH) |

**Supplementary Table 38.** Model performance on Alloy-GMAE with module increase (5-fold experiments).

| Module number | Split 0 | Split 1 | Split 2 | Split 3 | Split 4 | Mean MAE | Improvement  % |
| --- | --- | --- | --- | --- | --- | --- | --- |
| 5 | 0.155 | 0.163 | 0.128 | 0.124 | 0.132 | 0.140 | - |
| 10 | 0.121 | 0.102 | 0.096 | 0.111 | 0.101 | 0.106 | 24.4 |
| 15 | 0.093 | 0.098 | 0.099 | 0.081 | 0.091 | 0.092 | 12.9 |
| 20 | 0.086 | 0.080 | 0.087 | 0.072 | 0.080 | 0.081 | 12.5 |
| 25 | 0.084 | 0.081 | 0.086 | 0.069 | 0.079 | 0.079 | 1.8 |
| **30** | **0.071** | **0.069** | **0.063** | **0.060** | **0.063** | **0.065** | 17.9 |

**Supplementary Table 39.** Model performance on FG-GMAE with module increase (5-fold experiments).

| Module number | Split 0 | Split 1 | Split 2 | Split 3 | Split 4 | Mean MAE | Improvement  % |
| --- | --- | --- | --- | --- | --- | --- | --- |
| 5 | 0.065 | 0.070 | 0.075 | 0.072 | 0.067 | 0.070 | - |
| 10 | 0.052 | 0.050 | 0.064 | 0.052 | 0.054 | 0.054 | 22.3 |
| 15 | 0.037 | 0.038 | 0.031 | 0.042 | 0.052 | 0.040 | 26.2 |
| 20 | 0.033 | 0.034 | 0.032 | 0.039 | 0.045 | 0.037 | 8.4 |
| 25 | 0.033 | 0.033 | 0.034 | 0.039 | 0.046 | 0.037 | -0.5 |
| **30** | **0.030** | **0.034** | **0.031** | **0.038** | **0.045** | **0.036** | 3.3 |

**Supplementary Table 40.** Model performance on Dissociation-OC20 with module increase (5-fold experiments).

| Module number | Split 0 | Split 1 | Split 2 | Split 3 | Split 4 | Mean MAE | Improvement  % |
| --- | --- | --- | --- | --- | --- | --- | --- |
| 5 | 0.748 | 0.594 | 0.783 | 0.885 | 0.591 | 0.720 | - |
| 10 | 0.767 | **0.554** | 0.723 | 0.902 | 0.534 | 0.696 | 3.4 |
| 15 | 0.847 | 0.755 | **0.696** | 0.887 | 0.527 | 0.742 | -6.7 |
| 20 | 0.729 | 0.637 | 0.782 | 0.865 | 0.539 | 0.710 | 4.4 |
| 25 | 0.687 | 0.594 | 0.761 | **0.836** | **0.499** | **0.675** | 4.9 |
| **30** | **0.683** | 0.621 | 0.776 | 0.844 | 0.503 | 0.685 | -1.5 |

**Supplementary Table 41.** Model performance on Transfer-OC20 with module increase (5-fold experiments).

| Module number | Split 0 | Split 1 | Split 2 | Split 3 | Split 4 | Mean MAE | Improvement  % |
| --- | --- | --- | --- | --- | --- | --- | --- |
| 5 | 0.689 | 0.638 | 0.598 | 0.676 | 0.568 | 0.634 | - |
| 10 | 0.677 | **0.615** | 0.570 | 0.696 | 0.572 | 0.626 | 1.2 |
| 15 | 0.656 | 0.647 | **0.515** | 0.677 | 0.567 | 0.612 | 2.2 |
| 20 | 0.653 | 0.642 | 0.547 | 0.694 | **0.562** | 0.619 | -1.2 |
| 25 | 0.657 | 0.637 | 0.566 | 0.611 | 0.564 | 0.607 | 2 |
| **30** | **0.648** | 0.638 | 0.520 | **0.554** | 0.564 | **0.585** | 3.7 |

## Life cycle analysis of CG-Ti and CPP-Zr


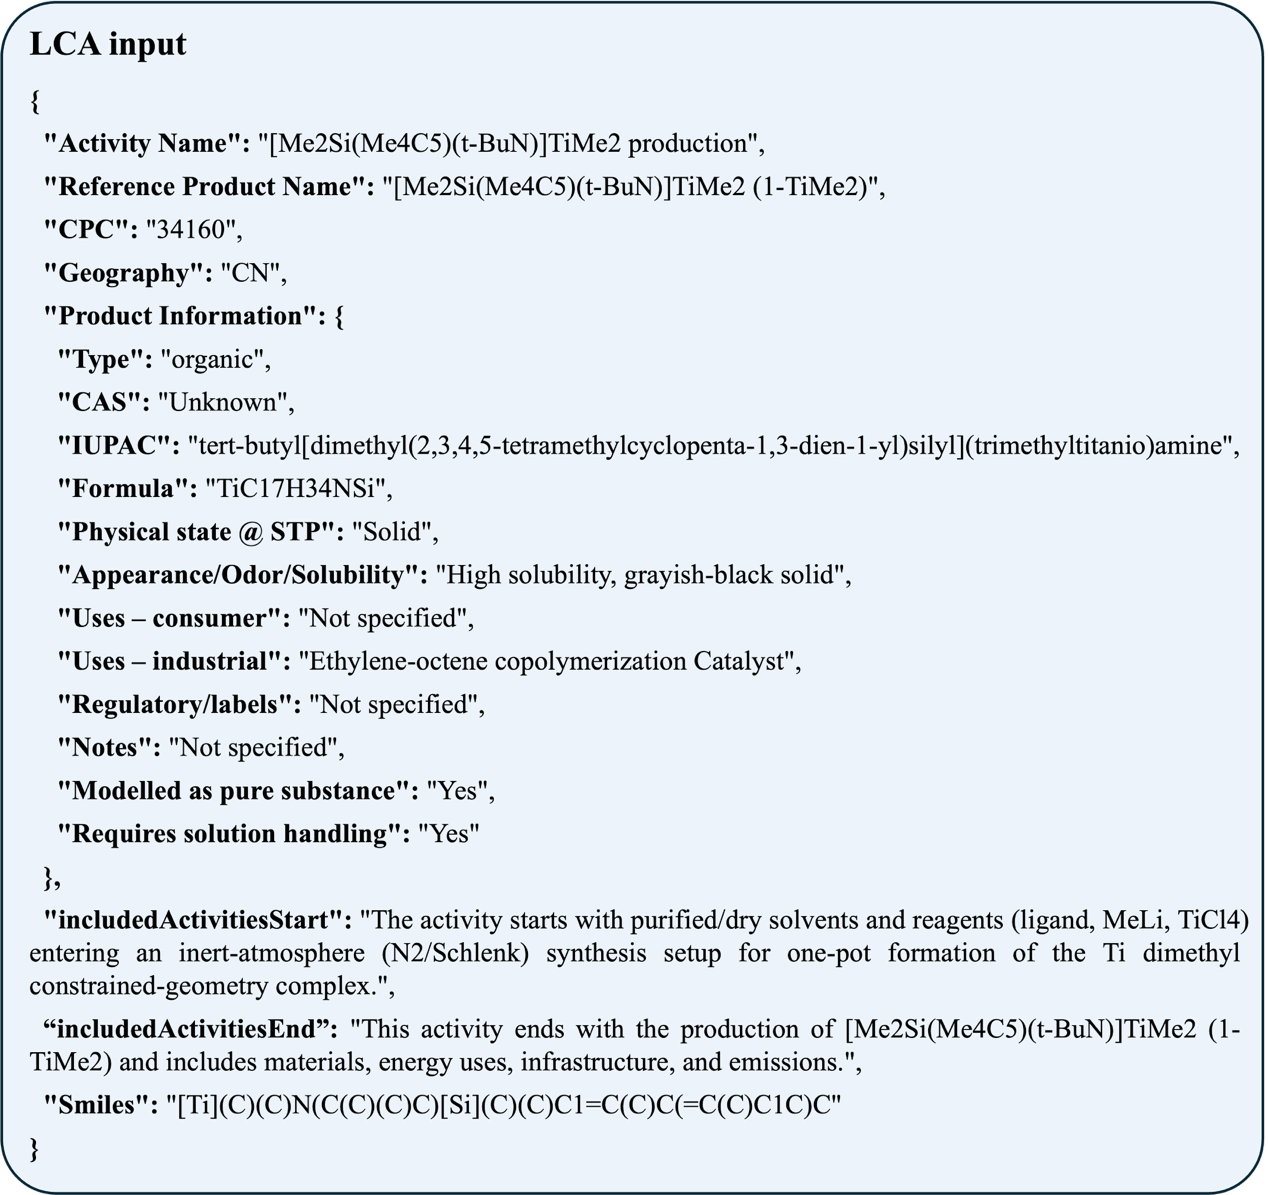


**Supplementary Fig 19.** Input information of **CG-Ti** for GWP prediction.


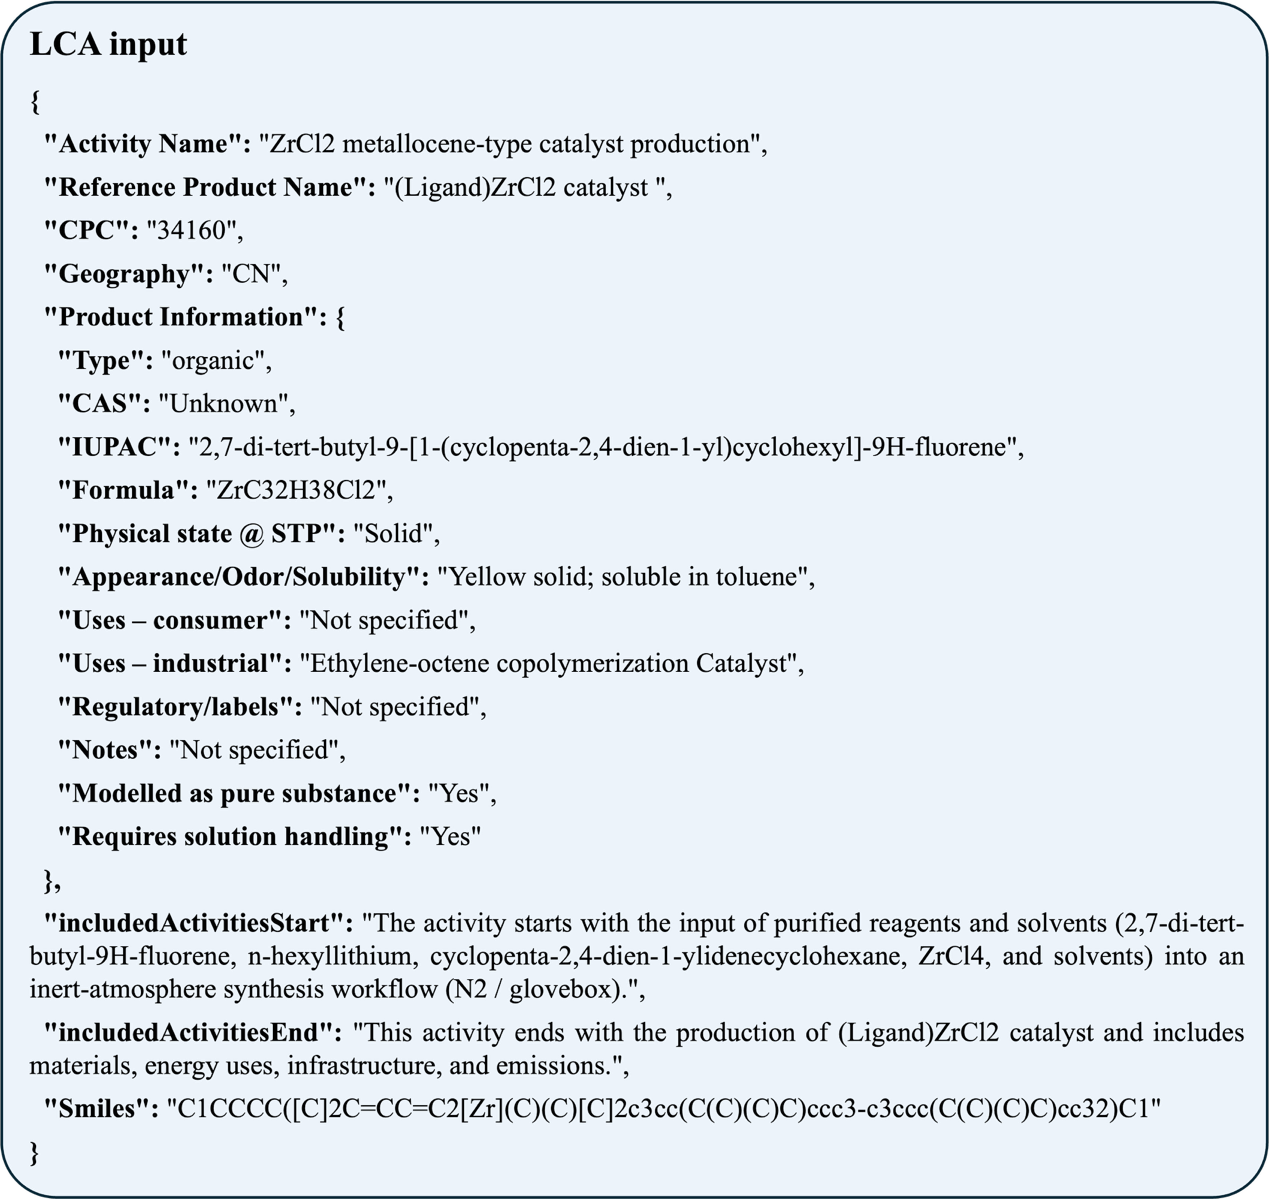


**Supplementary Fig** **20.** Input information of **CPP-Zr** for GWP prediction.

**Supplementary Table 42.** Life cycle inventory of **CG-Ti**.

| **Process** | **Activity Name** | **Category** | **Value** | **Unit** | **Data type** |
| --- | --- | --- | --- | --- | --- |
| POE Production | POE | Product | 1.0000 | kg | Measured primary data |
| POE Production | Ethylene | Raw material | 0.6173 | kg | Measured primary data |
| POE Production | 1-octene | Raw material | 0.3827 | kg | Measured primary data |
| POE Production | [Me2Si(Me4C5)(t-BuN)]TiMe2(1-TiMe2) | Auxiliary material | 0.0094 | kg | Measured primary data |
| POE Production | IsoparE | Auxiliary material | 0.9985 | kg | Measured primary data |
| POE Production | Toluene | Auxiliary material | 0.0173 | kg | Assumed estimate |
| POE Production | Modified Methylaluminoxane, Type 7 (MMAO-7) | Auxiliary material | 0.0057 | kg | Measured primary data |
| POE Production | Electricity | Energy and energy carriers | 2.9300 | kWh | Measured primary data |
| POE Production | Wastewater | Waste | 1.0214 | kg | Measured primary data |

**Supplementary Table 43.** Carbon footprint factor of **CG-Ti**.

| **Process** | **Activity Name** | **GWP100 (IPCC 2021 method)** | **Region** | **Data source category** |
| --- | --- | --- | --- | --- |
| POE Production | POE | \ | \ | \ |
| POE Production | Ethylene | 2.9657 | China | LCA database |
| POE Production | 1-octene | 14.9500 | South Korea | Literature data |
| POE Production | [Me2Si(Me4C5)(t-BuN)]TiMe2 (1-TiMe2) | 5.4270 | China | Predicted value based on AI |
| POE Production | IsoparE | 1.2662 | Rest of World | LCA database (proxy) |
| POE Production | Toluene | 1.6799 | Rest of World | LCA database |
| POE Production | Modified Methylaluminoxane, Type 7 (MMAO-7) | 3.0876 | Global | LCA database (proxy) |
| POE Production | Electricity | 0.7022 | China | LCA database |
| POE Production | Wastewater | 0.0203 | Rest of World | LCA database |

**Supplementary Table 44.** Life cycle inventory of CatAI-designed catalyst **CPP-Zr**.

| **Process** | **Activity Name** | **Category** | **Value** | **Unit** | **Data type** |
| --- | --- | --- | --- | --- | --- |
| POE Production | POE | Product | 1.0000 | kg | Measured primary data |
| POE Production | Ethylene | Raw material | 0.6920 | kg | Measured primary data |
| POE Production | 1-octene | Raw material | 0.3080 | kg | Measured primary data |
| POE Production | ZrCl2 metallocene-type catalyst | Auxiliary material | 0.0045 | kg | Measured primary data |
| POE Production | IsoparE | Auxiliary material | 0.8036 | kg | Measured primary data |
| POE Production | Toluene | Auxiliary material | 0.0173 | kg | Assumed estimate |
| POE Production | Modified Methylaluminoxane, Type 7 (MMAO-7) | Auxiliary material | 0.0046 | kg | Measured primary data |
| POE Production | Electricity | Energy and energy carriers | 2.9300 | kWh | Measured primary data |
| POE Production | Wastewater | Waste | 0.8254 | kg | Measured primary data |

**Supplementary Table 45.** Carbon footprint factor of CatAI-designed catalyst **CPP-Zr**.

| **Process** | **Activity Name** | **GWP100 (IPCC 2021 method)** | **Region** | **Data source category** |
| --- | --- | --- | --- | --- |
| POE Production | POE | \ | \ | \ |
| POE Production | Ethylene | 2.9657 | China | LCA database |
| POE Production | 1-octene | 14.9500 | South Korea | Literature data |
| POE Production | ZrCl2 metallocene-type catalyst | 2.6728 | China | Predicted value based on AI |
| POE Production | IsoparE | 1.2662 | Rest of World | LCA database (proxy) |
| POE Production | Toluene | 1.6799 | Rest of World | LCA database |
| POE Production | Modified Methylaluminoxane, Type 7 (MMAO-7) | 3.0876 | Global | LCA database (proxy) |
| POE Production | Electricity | 0.7022 | China | LCA database |
| POE Production | Wastewater | 0.0203 | Rest of World | LCA database |

## CatAI platform for community usage


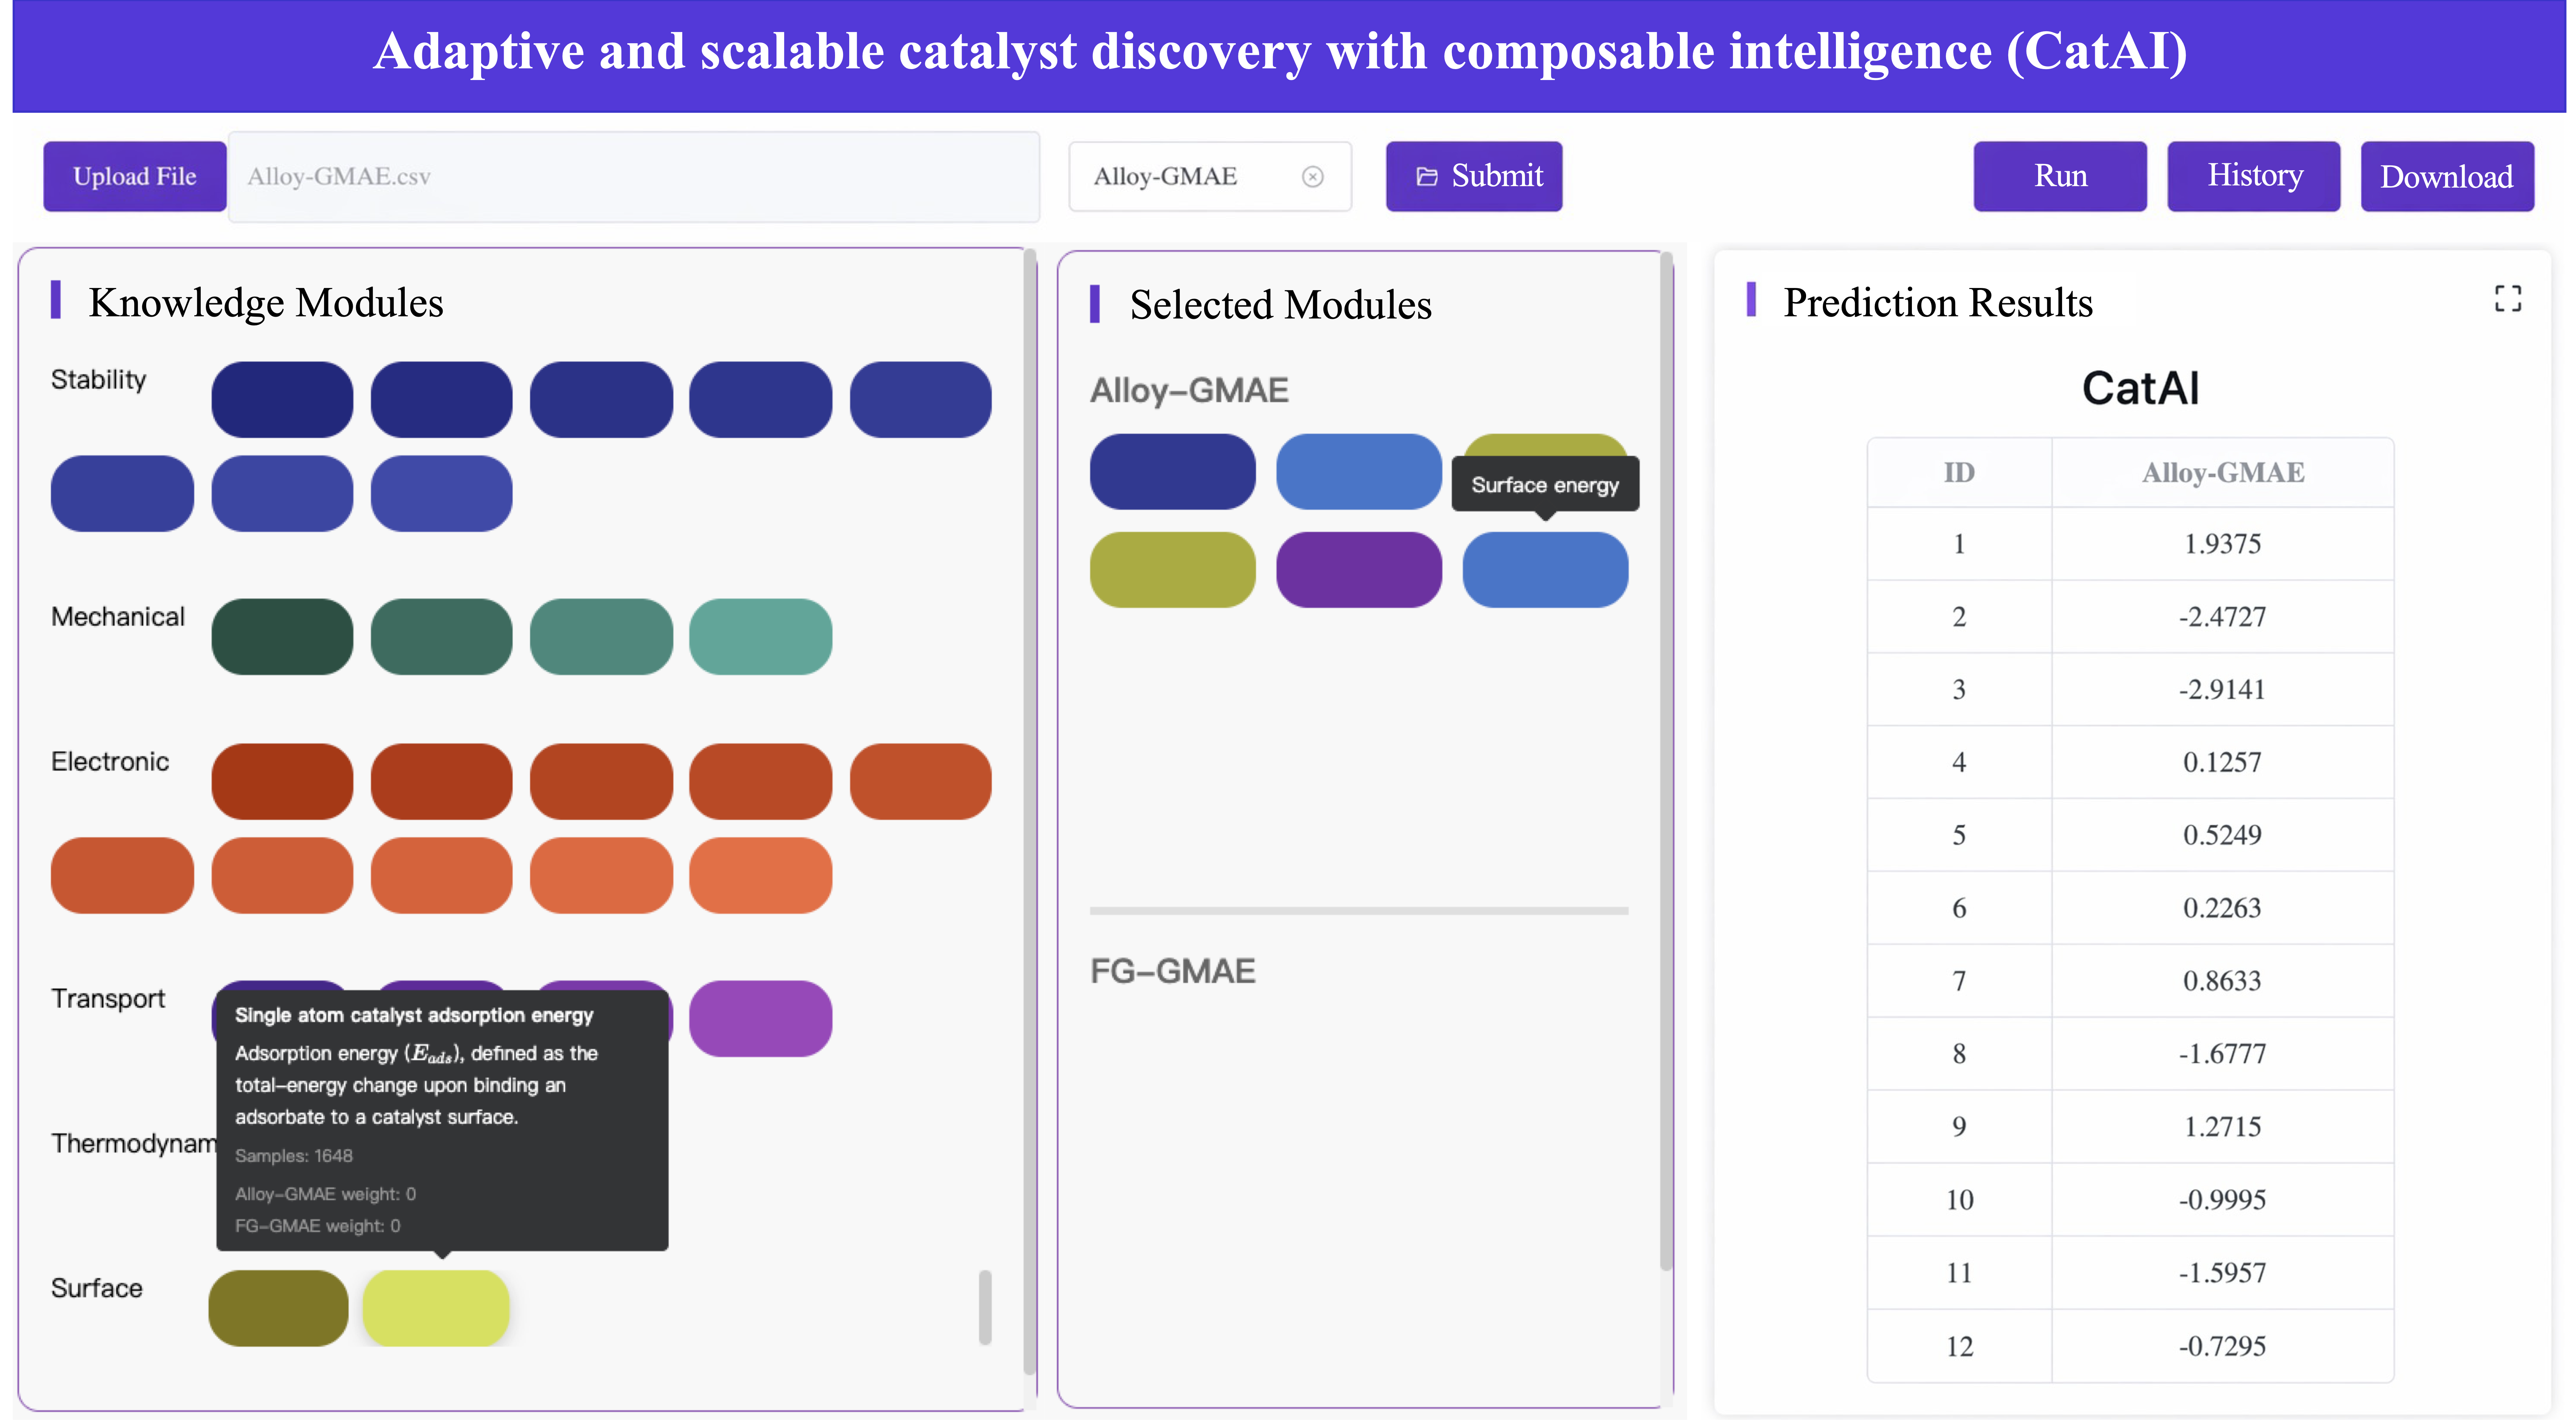


**Supplementary Fig 21.** CatAI interface for catalyst property prediction.

# References

1. Shoghi, N. *et al.* From Molecules to Materials: Pre-training Large Generalizable Models for Atomic Property Prediction. Preprint at https://doi.org/10.48550/arXiv.2310.16802 (2024).

2. Gasteiger, J. *et al.* GemNet-OC: developing graph neural networks for large and diverse molecular simulation datasets. Preprint at https://doi.org/10.48550/arXiv.2204.02782 (2022).

3. Jain, A. *et al.* Commentary: the materials project: a materials genome approach to accelerating materials innovation. *APL Mater.* **1**, 11002 (2013).

4. Castelli, I. E. *et al.* New cubic perovskites for one- and two-photon water splitting using the computational materials repository. *Energy Environ. Sci.* **5**, 9034–9043 (2012).

5. Choudhary, K. *et al.* The joint automated repository for various integrated simulations (JARVIS) for data-driven materials design. *npj Comput. Mater.* **6**, 173 (2020).

6. Kirklin, S. *et al.* The open quantum materials database (OQMD): assessing the accuracy of DFT formation energies. *npj Comput. Mater.* **1**, 15010 (2015).

7. Rosen, A. S. *et al.* Machine learning the quantum-chemical properties of metal–organic frameworks for accelerated materials discovery. *Matter* **4**, 1578–1597 (2021).

8. Rosen, A. S. *et al.* High-throughput predictions of metal–organic framework electronic properties: theoretical challenges, graph neural networks, and data exploration. *npj Comput. Mater.* **8**, 112 (2022).

9. Balcells, D. & Skjelstad, B. B. tmQM dataset—quantum geometries and properties of 86k transition metal complexes. *J. Chem. Inf. Model.* **60**, 6135–6146 (2020).

10. Hachmann, J. *et al.* The harvard clean energy project: large-scale computational screening and design of organic photovoltaics on the world community grid. *J. Phys. Chem. Lett.* **2**, 2241–2251 (2011).

11. Ricci, F. *et al.* An ab initio electronic transport database for inorganic materials. *Sci. Data* **4**, 170085 (2017).

12. Yin, J. *et al.* SurFF: a foundation model for surface exposure and morphology across intermetallic crystals. *Nat. Comput. Sci.* **5**, 782–792 (2025).

13. Chen, H., Yin, J., Li, J. & Wang, X. Theoretical high-throughput screening of single-atom CO2 electroreduction catalysts to methanol using active learning. *Engineering* **52**, 172–182 (2025).

14. Xie, T. & Grossman, J. C. Crystal Graph Convolutional Neural Networks for an Accurate and Interpretable Prediction of Material Properties. *Phys. Rev. Lett.* **120**, 145301 (2018).

15. Gasteiger, J., Giri, S., Margraf, J. T. & Günnemann, S. Fast and Uncertainty-Aware Directional Message Passing for Non-Equilibrium Molecules. Preprint at https://doi.org/10.48550/arXiv.2011.14115 (2022).

16. Liao, Y.-L. & Smidt, T. Equiformer: Equivariant Graph Attention Transformer for 3D Atomistic Graphs. https://openreview.net/forum?id=_efamP7PSjg (2022).

17. Passaro, S. & Zitnick, C. L. Reducing SO(3) Convolutions to SO(2) for Efficient Equivariant GNNs. Preprint at https://doi.org/10.48550/arXiv.2302.03655 (2023).

18. Chen, J., Huang, X., Hua, C., He, Y. & Schwaller, P. A multi-modal transformer for predicting global minimum adsorption energy. *Nat. Commun.* **16**, 3232 (2025).

19. Neumann, M. *et al.* Orb: a fast, scalable neural network potential. Preprint at https://doi.org/10.48550/2410.22570v1 (2024).

20. Rhodes, B. *et al.* Orb-v3: atomistic simulation at scale. Preprint at https://doi.org/10.48550/arXiv.2504.06231v2 (2025).

21. Wongwaiwattanakul, P. & Jongsomjit, B. Copolymerization of ethylene/1-octene via different pore sized silica-based-supported zirconocene/dMMAO catalysts. *Catal. Commun.* **10**, 118–122 (2008).

22. Canich, J. A. M., Izmer, V. V., Kononovich, D. S. & Voskoboynikov, A. Z. Tetrahydro-as-indacenyl catalyst composition, catalyst system, and processes for use thereof. US patent 9803037B1 (2017).

23. Hai, X. *et al.* Geminal-atom catalysis for cross-coupling. *Nature* **622**, 754–760 (2023).

24. Cai, Q. *et al.* De-Saturation of Single-Atom Copper Catalysts for Accelerating Propargylic Substitution Reactions. *Adv. Mater.* **37**, e09221 (2025).

25. Shi, J. *et al.* Defying the oxidative-addition prerequisite in cross-coupling through artful single-atom catalysts. *Nat. Commun.* **16**, 3223 (2025).

26. Bajada, M. A. *et al.* Light-driven C–O coupling of carboxylic acids and alkyl halides over a Ni single-atom catalyst. *Nat. Synth.* **2**, 1092–1103 (2023).

27. Wang, Y., Wen, X., Cui, X. & Zhang, X. P. Enantioselective Radical Cyclization for Construction of 5-Membered Ring Structures by Metalloradical C–H Alkylation. *J. Am. Chem. Soc.* **140**, 4792–4796 (2018).

28. Theodosis-Nobelos, P., Kourti, M., Tziona, P., Kourounakis, P. N. & Rekka, E. A. Esters of some non-steroidal anti-inflammatory drugs with cinnamyl alcohol are potent lipoxygenase inhibitors with enhanced anti-inflammatory activity. *Bioorg. Med. Chem. Lett.* **25**, 5028–5031 (2015).

29. Palladium-Catalyzed ipso-Didefluoroannulation of Allylic gem-Difluorides with Salicylic Acids. *Org. Lett.* **27**, 12200–12205 (2025).

30. Shi, H., Xie, D., Yang, R. & Cheng, Y. Synthesis of Caffeic Acid Phenethyl Ester Derivatives, and Their Cytoprotective and Neuritogenic Activities in PC12 Cells. *J. Agric. Food Chem.* **62**, 5046–5053 (2014).

# NMR spectra of purified products

**1H NMR spectra (400 MHz, C6D6) of Cat 1**

**1H NMR spectra (400 MHz, C6D6) of Cat 2**

**1H NMR spectra (400 MHz, C6D6) of CPP-Zr**


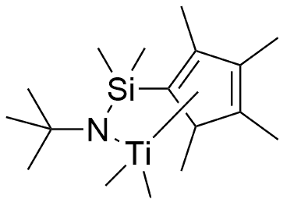


**1H NMR spectra (400 MHz, C6D6) of CG-Ti**

**1H NMR spectra (400 MHz, CDCl3) of ±3**

**1H NMR spectra (400 MHz, CDCl3) of ±5**

**13C NMR spectra (101 MHz, CDCl3) of ±5**

**1H NMR spectra (400 MHz, CDCl3) of ±7**

**1H NMR spectra (400 MHz, CDCl3) of ±9**

**1H NMR spectra (400 MHz, CDCl3) of 10**

**13C NMR spectra (101 MHz, CDCl3) of 10**

**1H NMR spectra (400 MHz, CDCl3) of 11**

**13C NMR spectra (101 MHz, CDCl3) of 11**

**1H NMR spectra (400 MHz, CDCl3) of 12**

**13C NMR spectra (101 MHz, CDCl3) of 12**

**1H NMR spectra (400 MHz, CDCl3) of 13**

**1H NMR spectra (400 MHz, CDCl3) of 16**
