# Supplementary material
Source: Research Square preprint supplement (doi:10.21203/rs.3.rs-9556645/v1)

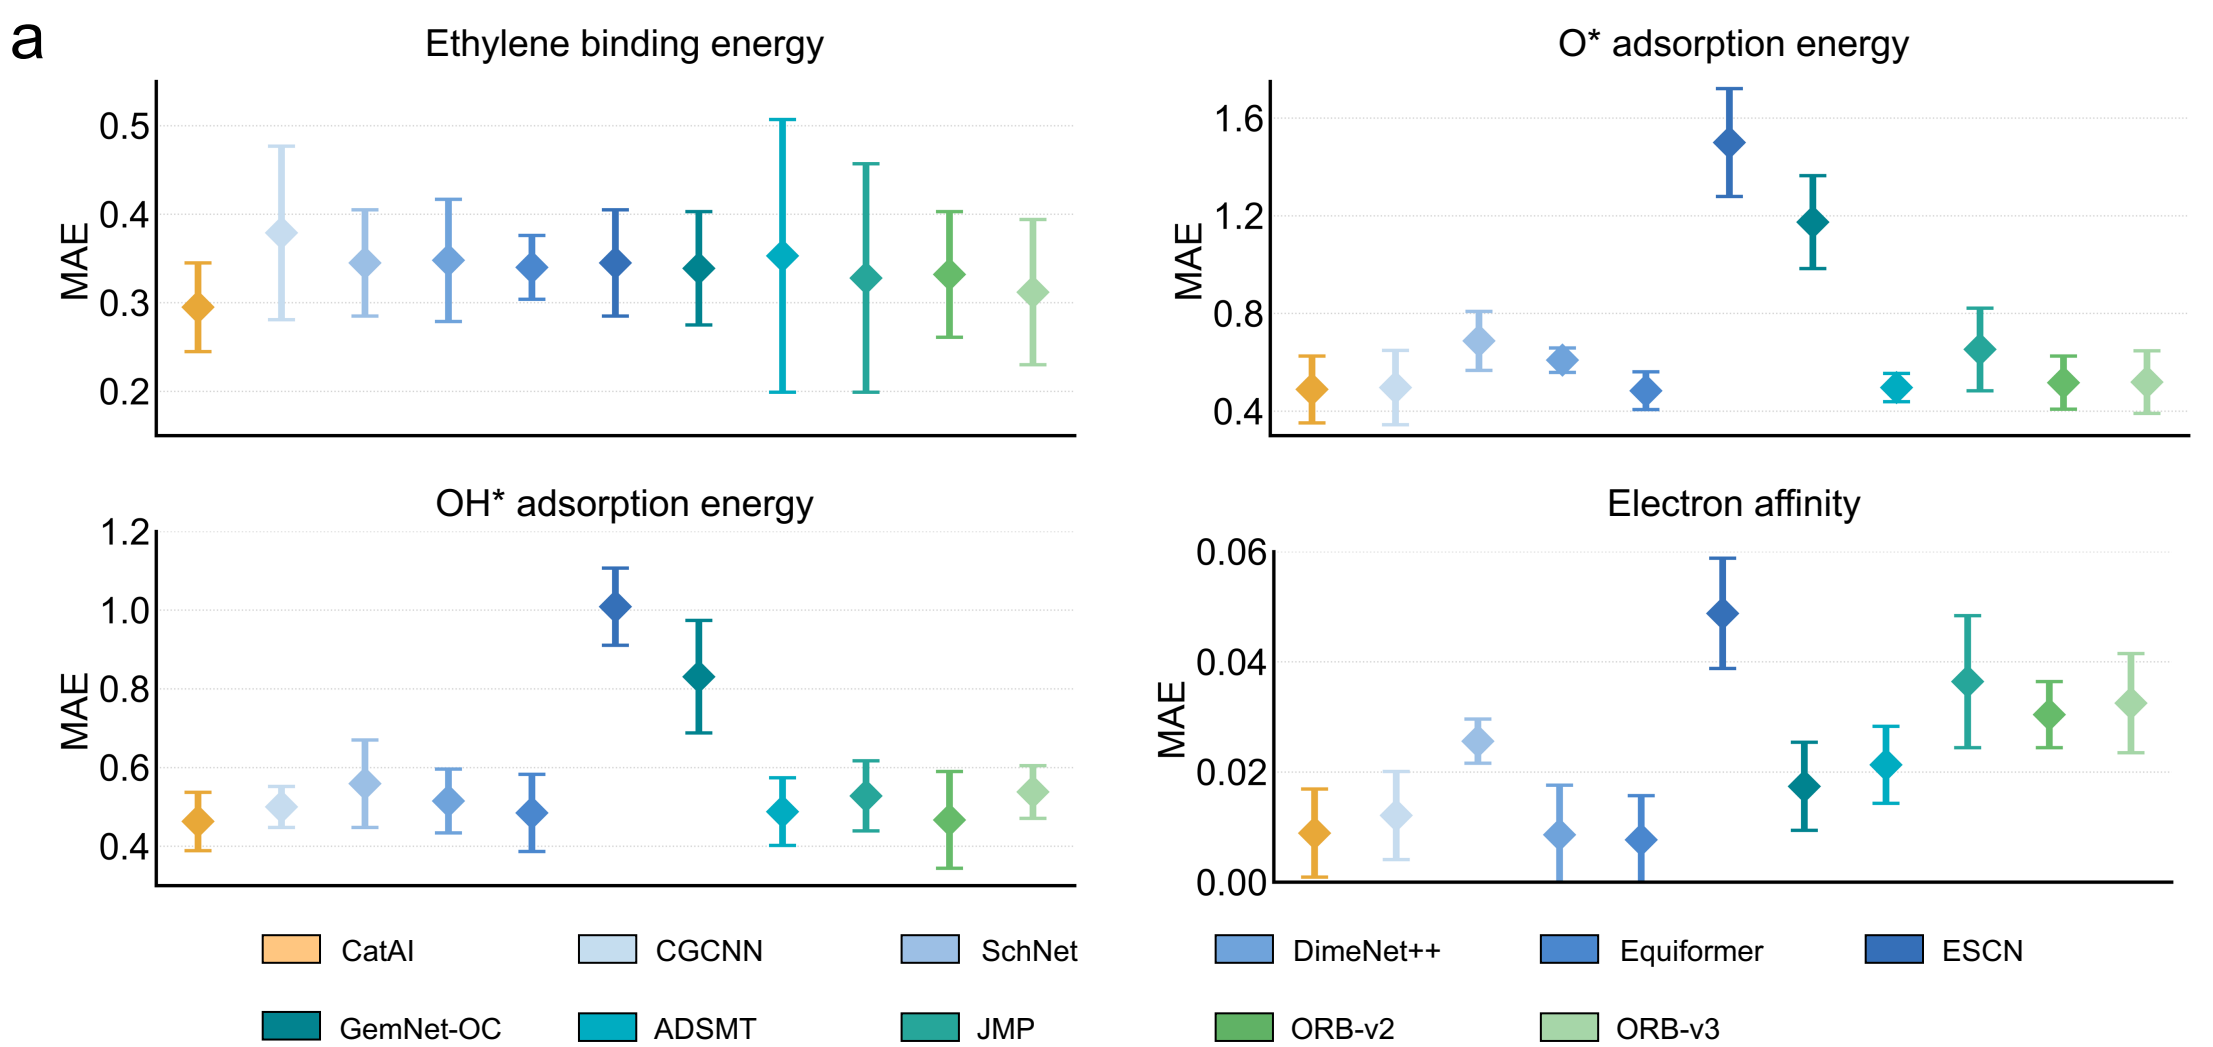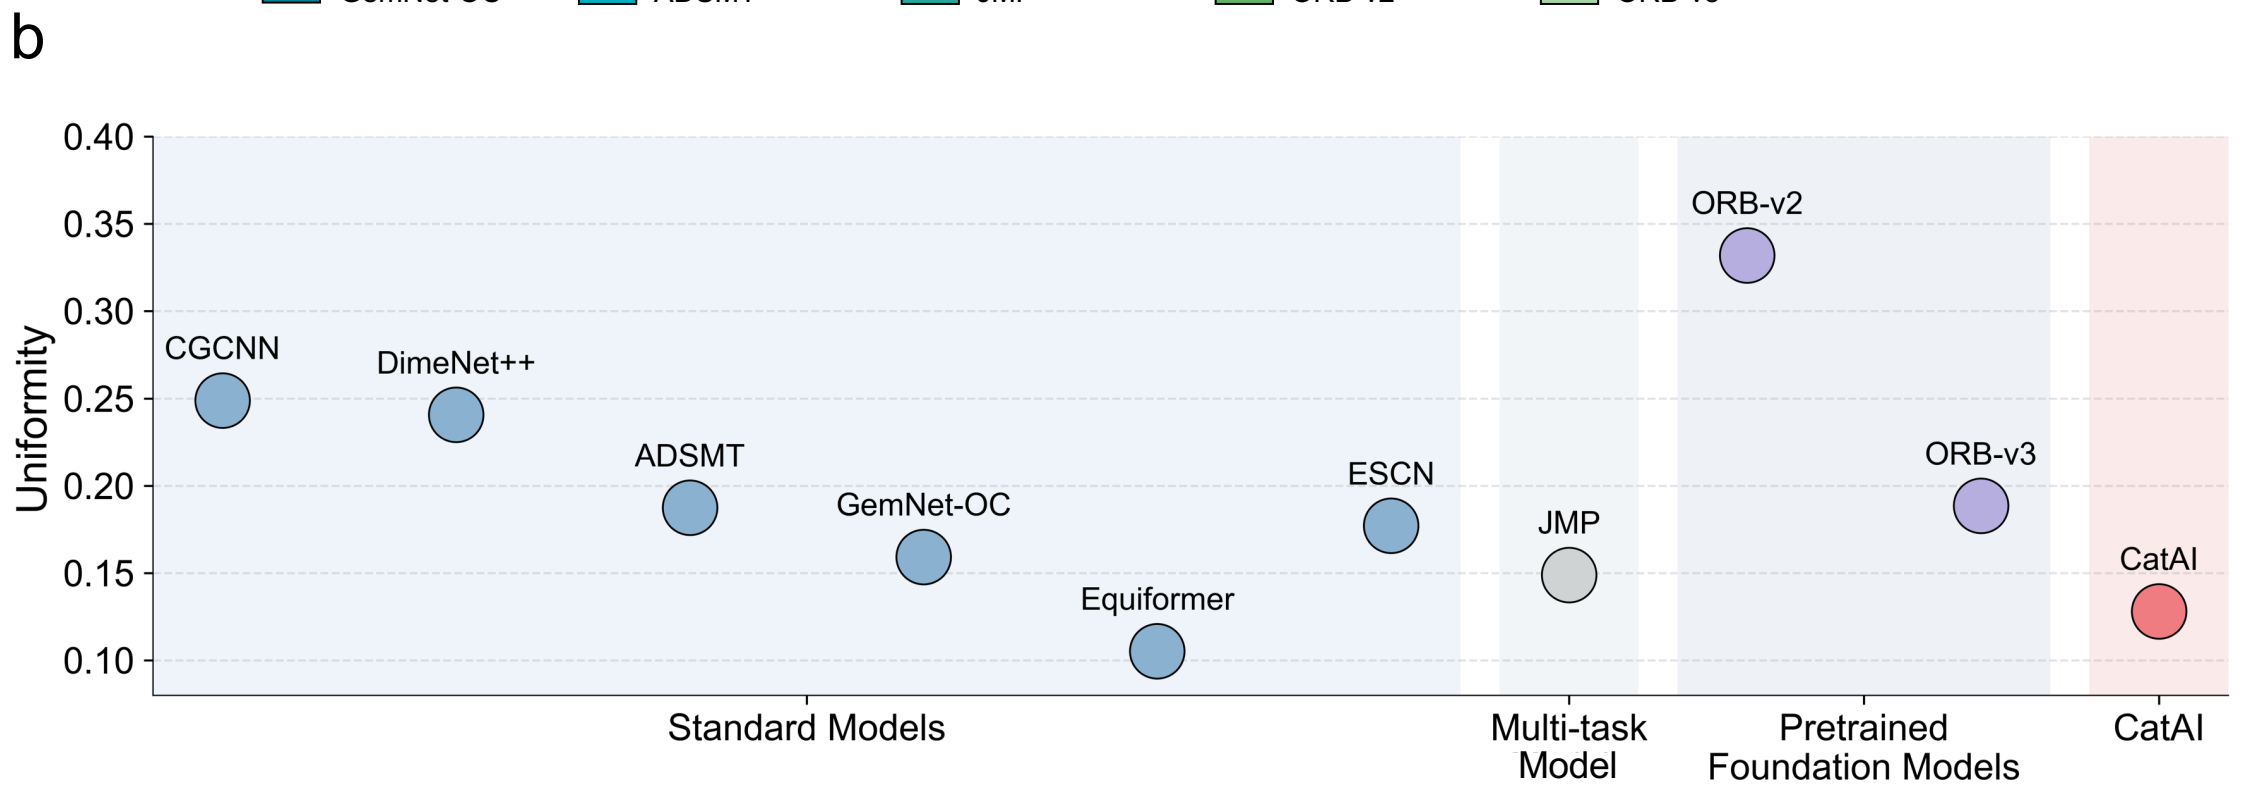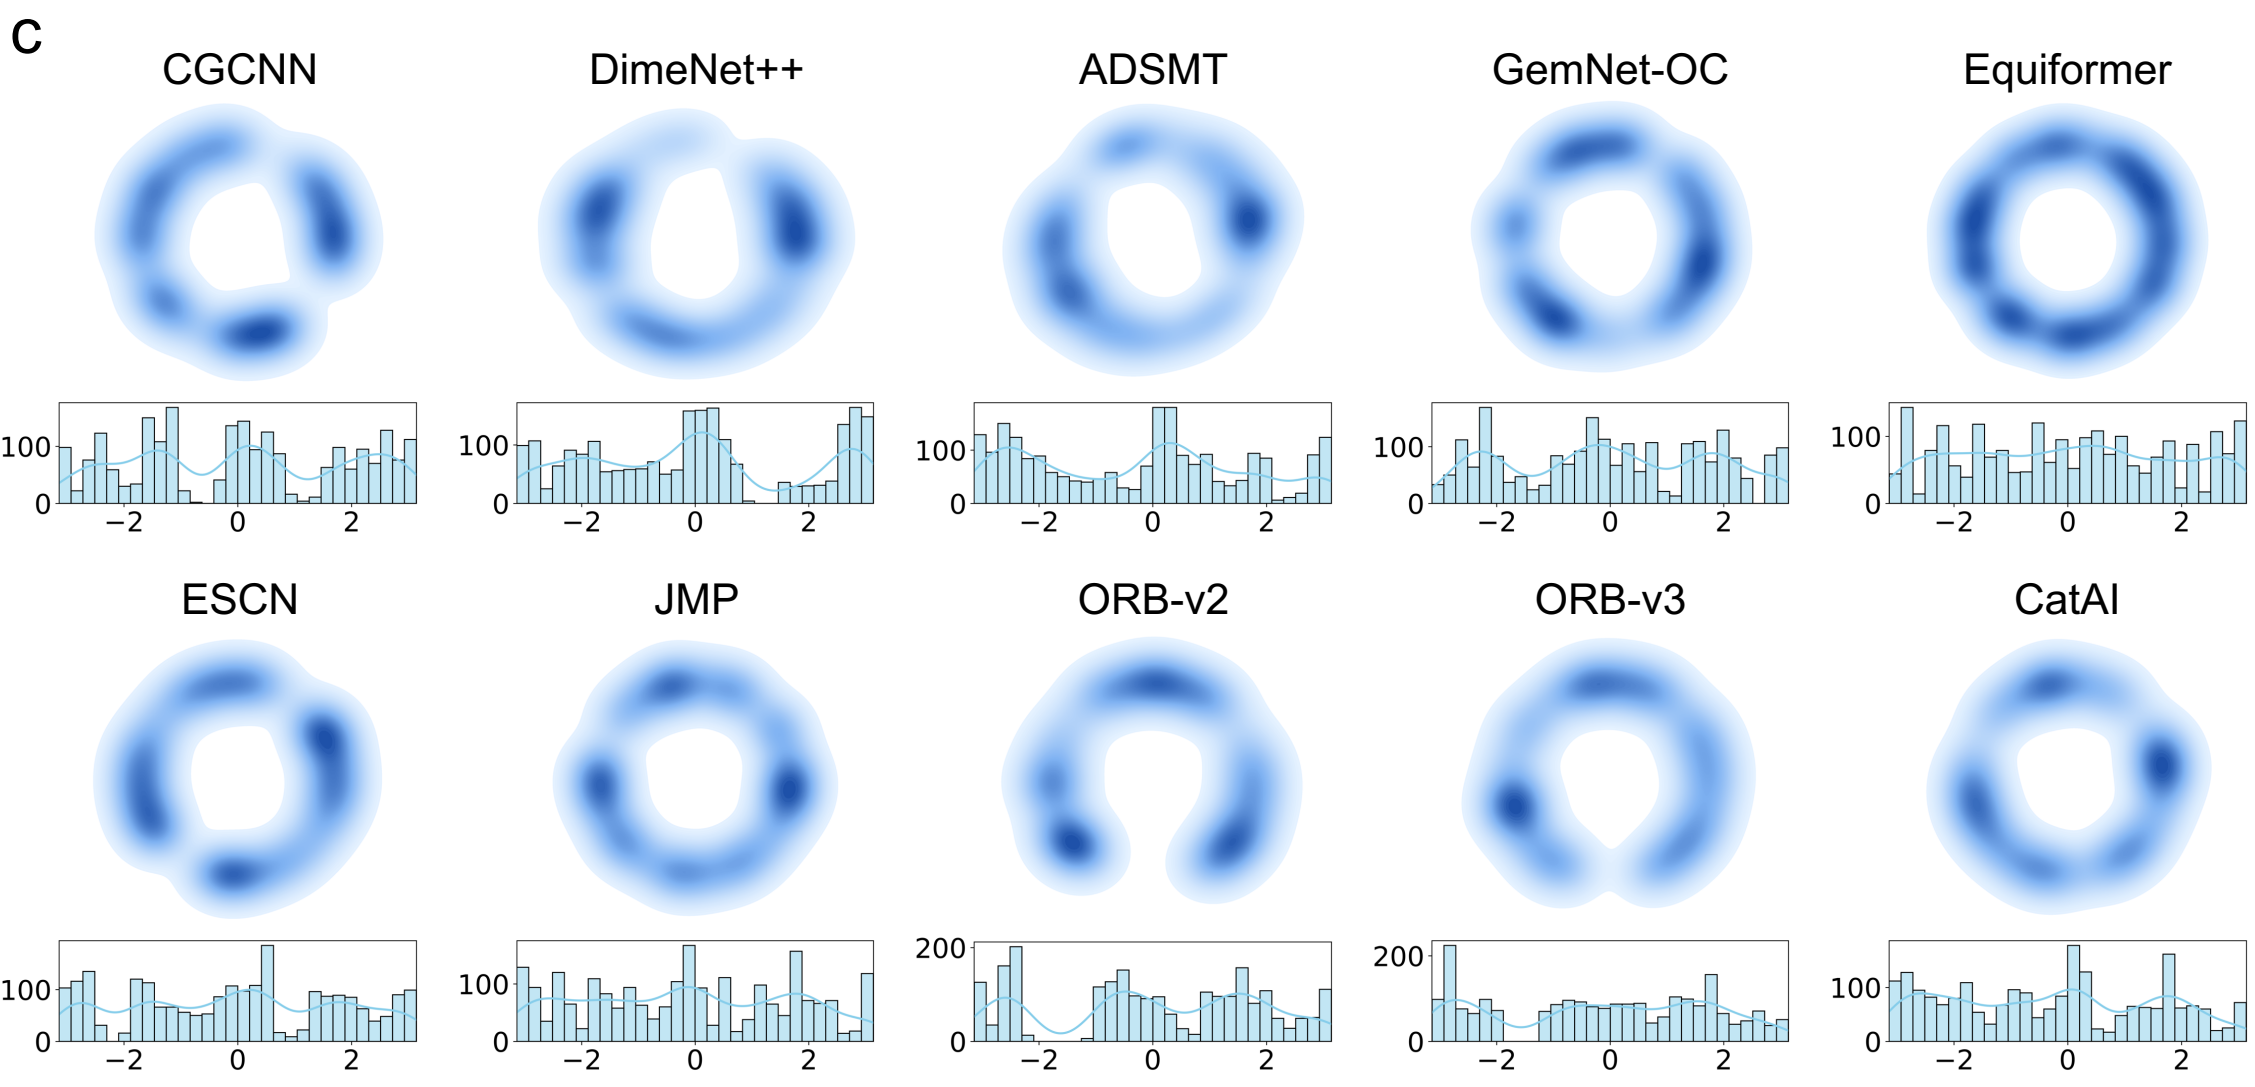

Supplement: Supplementary file 1 [file 3f7bae24214daa7547c50609.pdf]

a

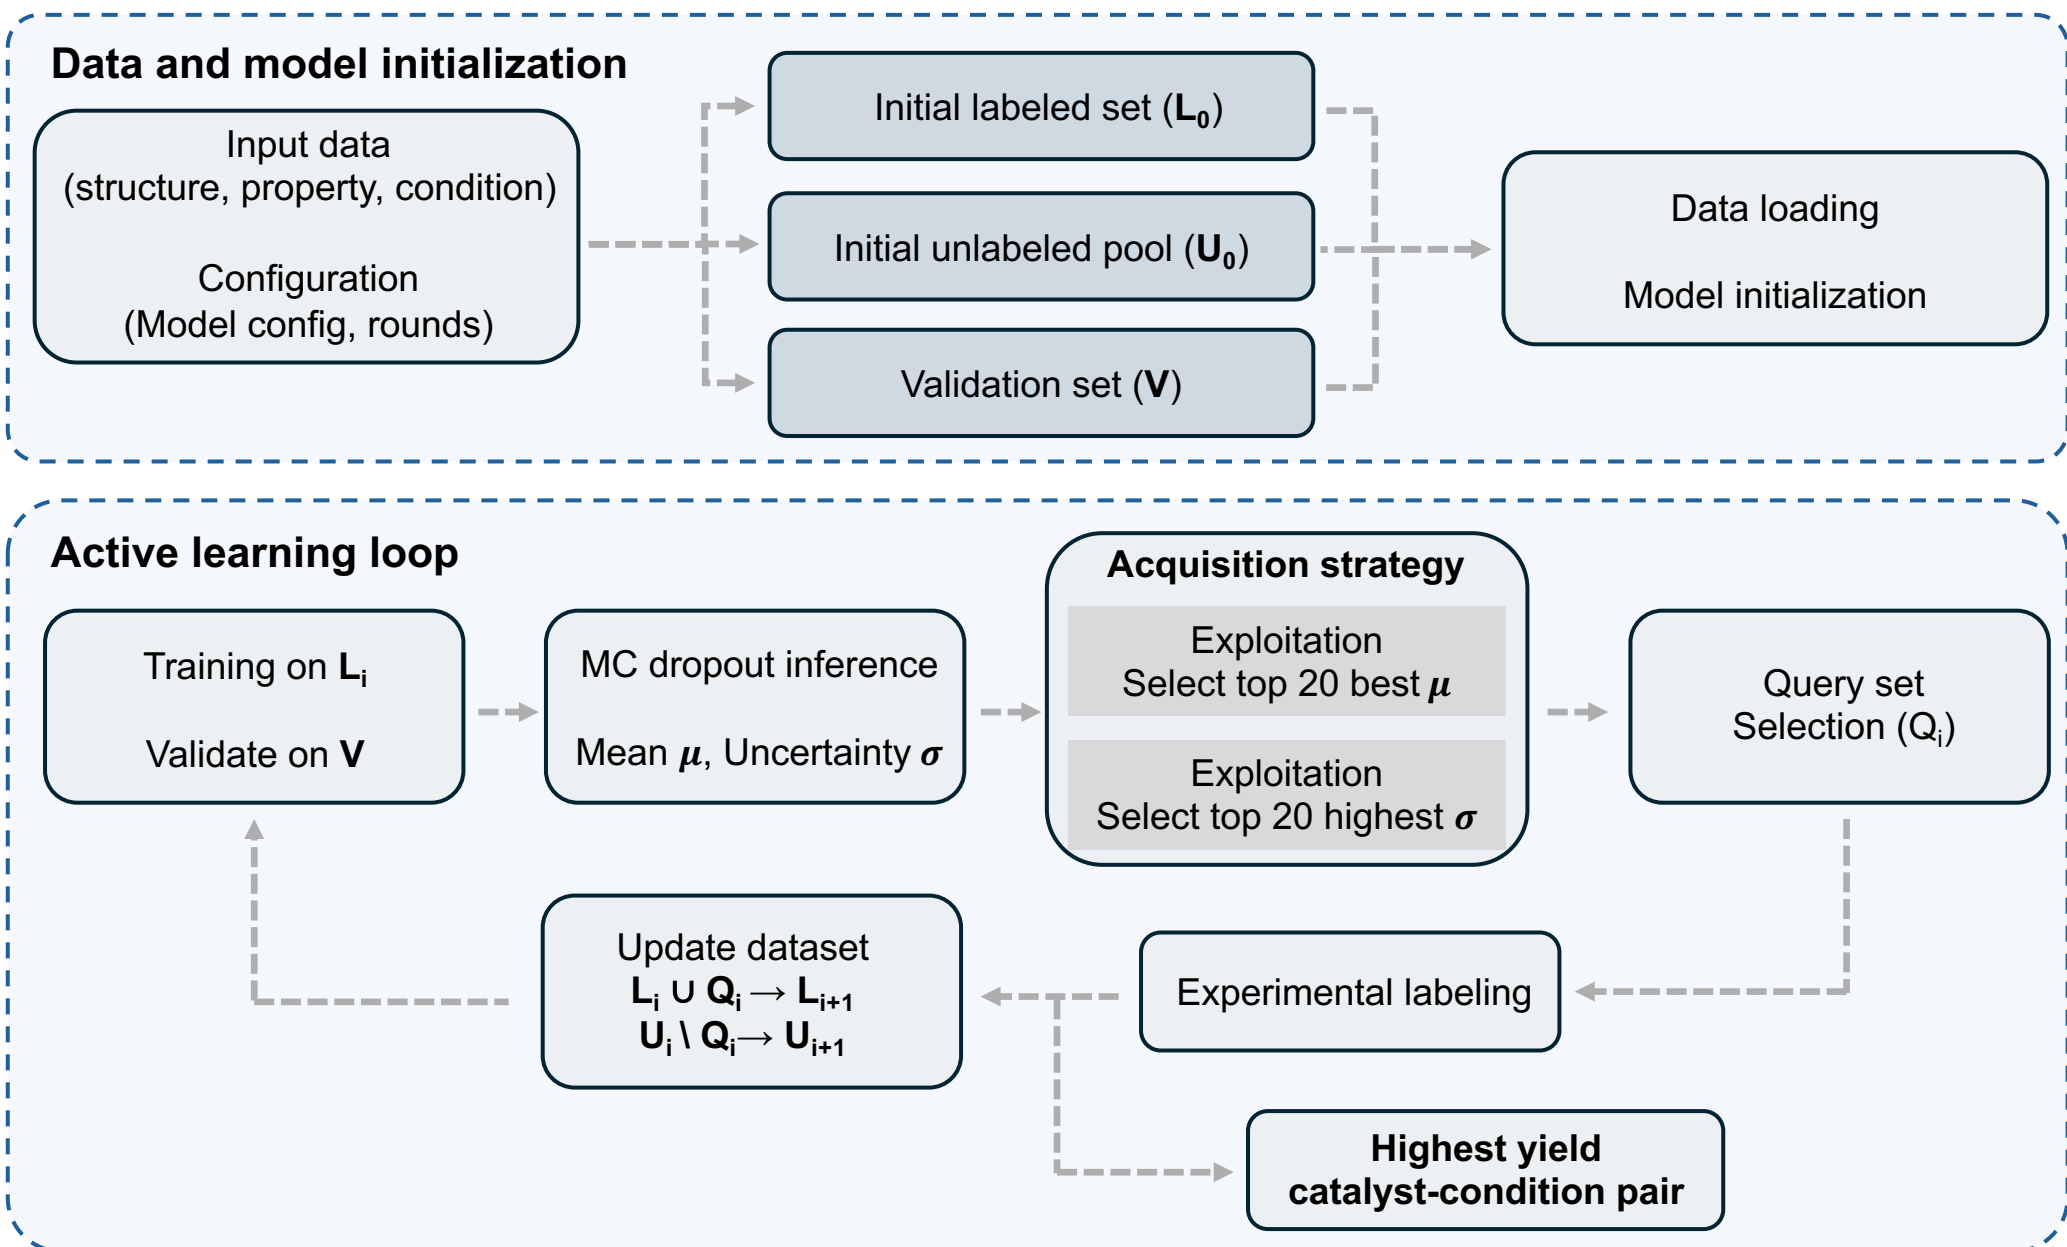

b

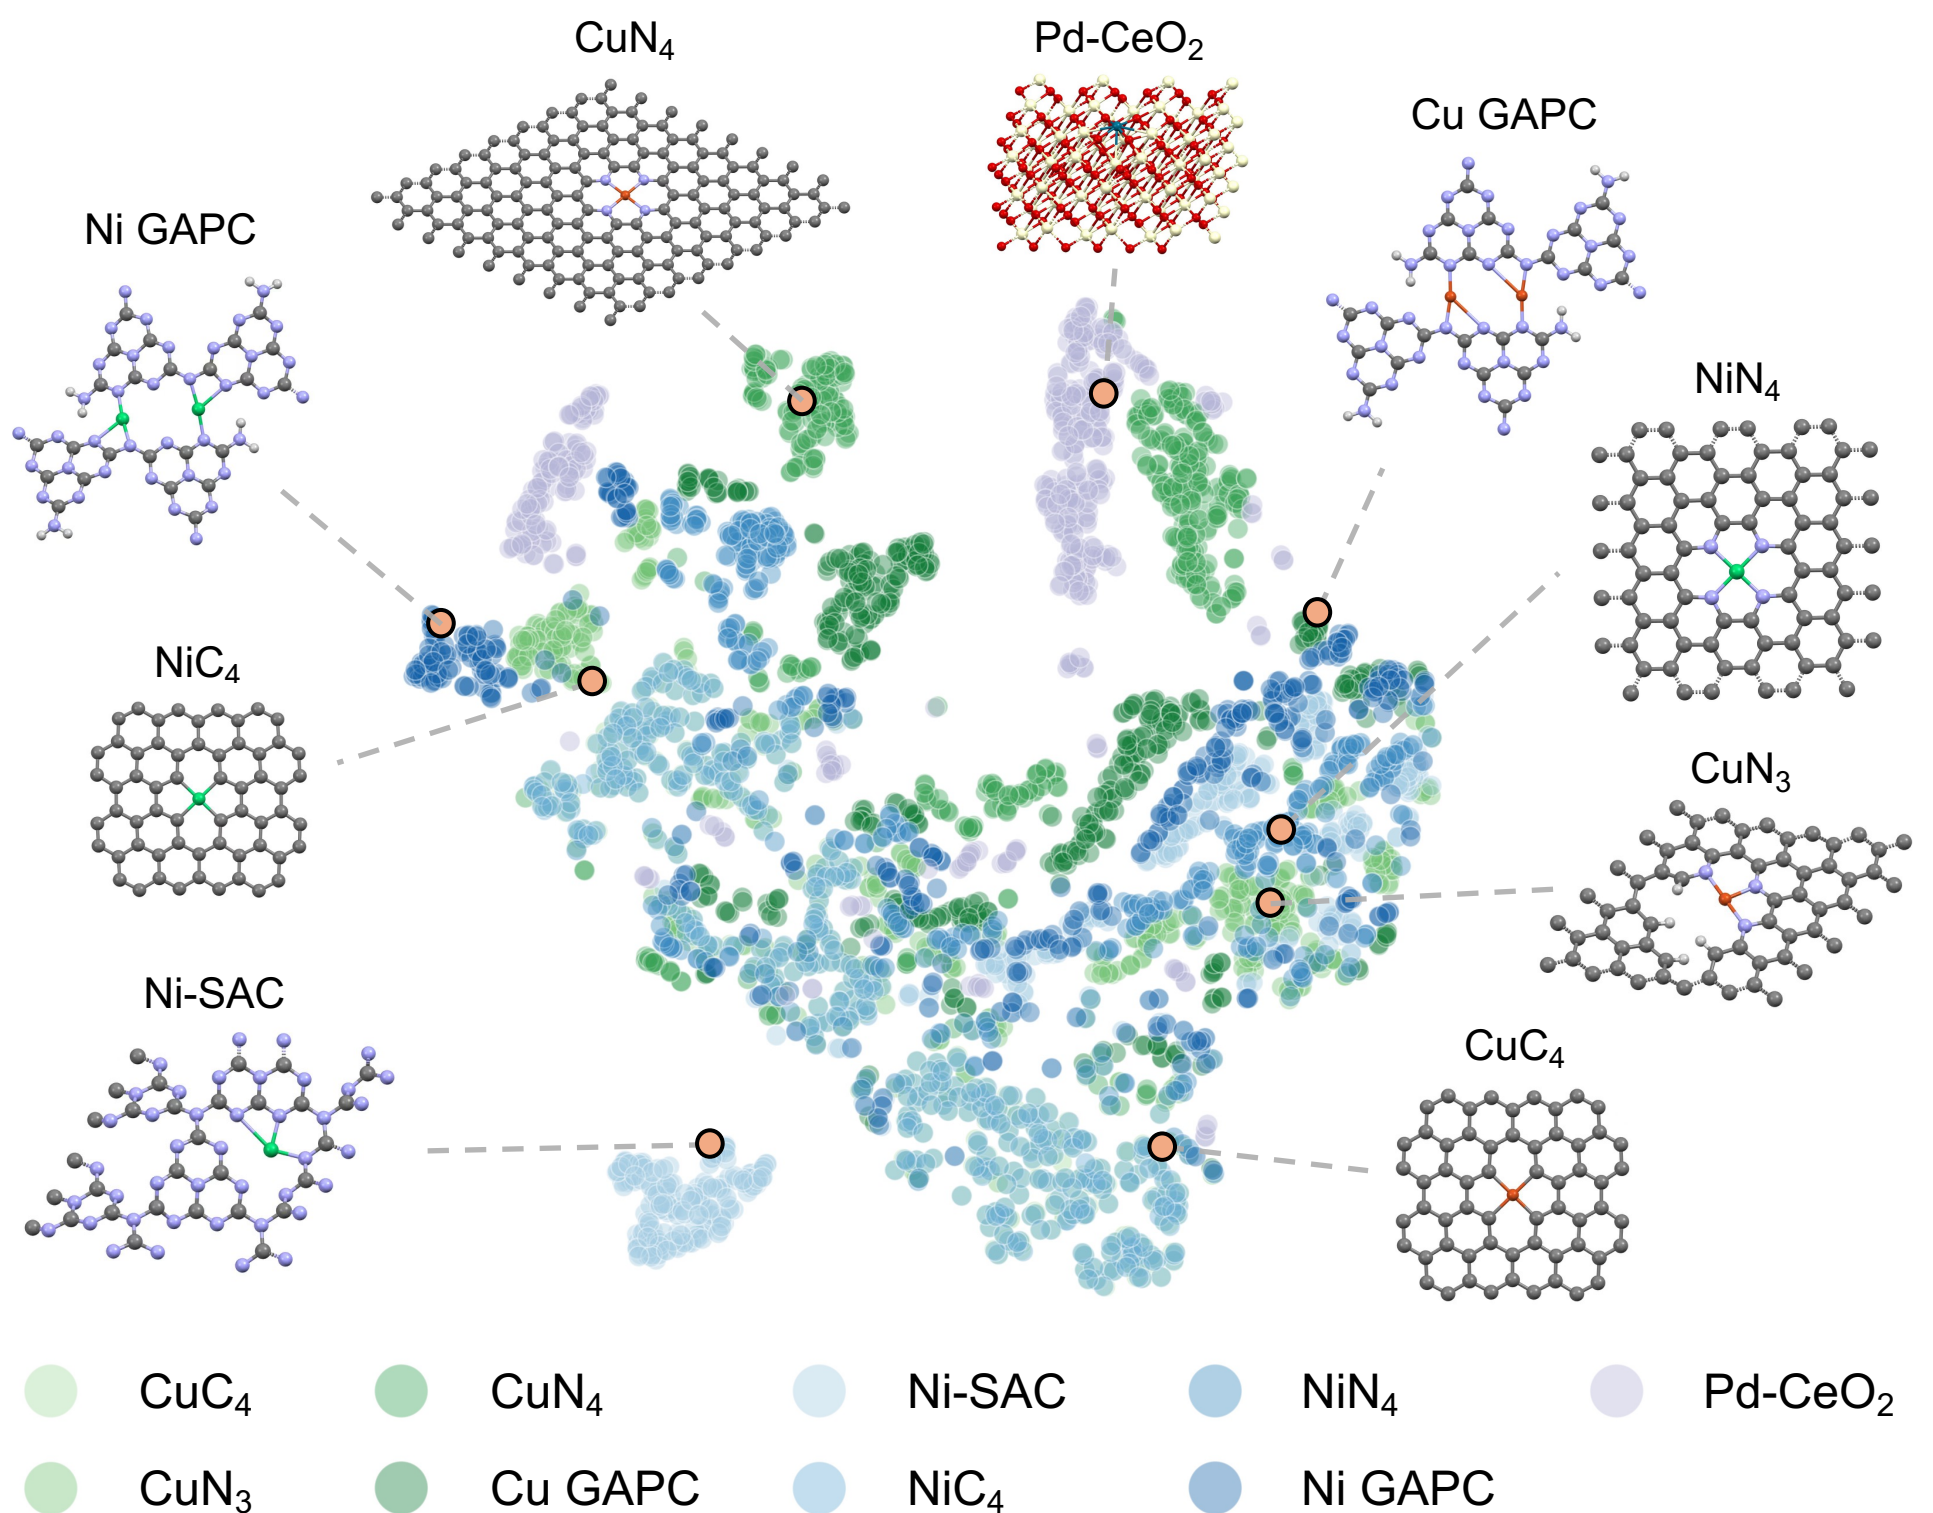

Supplement: Supplementary file 3 [file 900f0f8814056e49c04ef818.pdf]

a

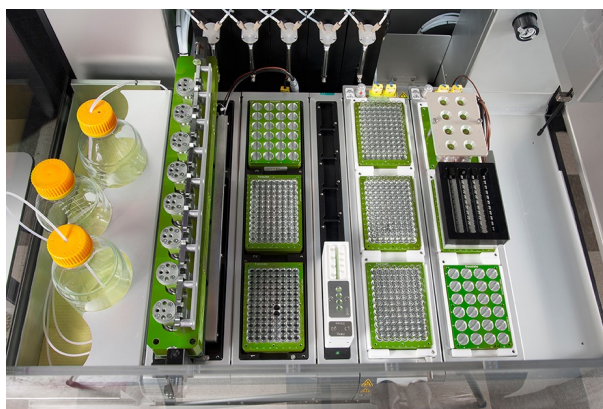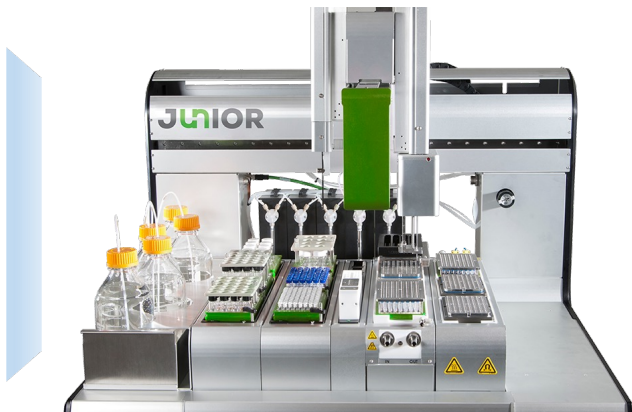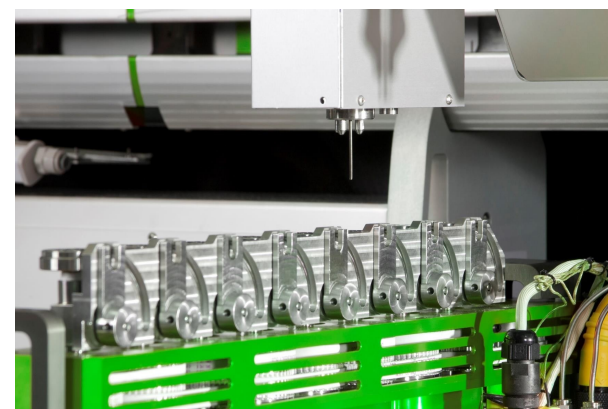

b

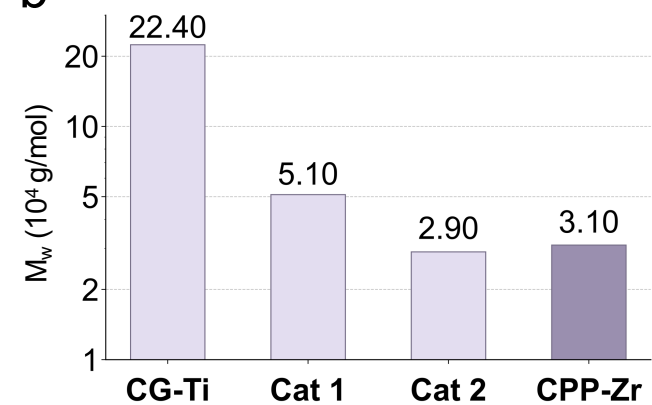

c

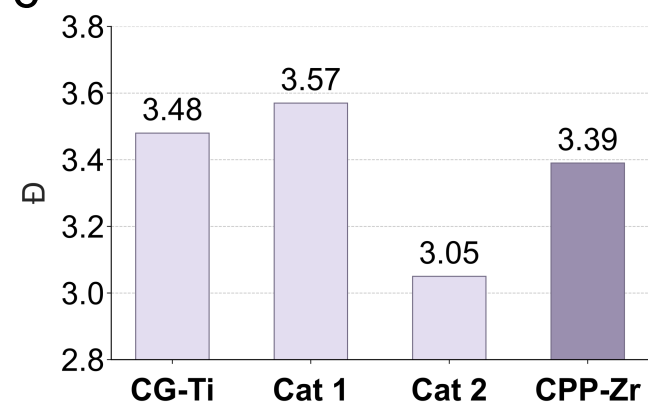

d

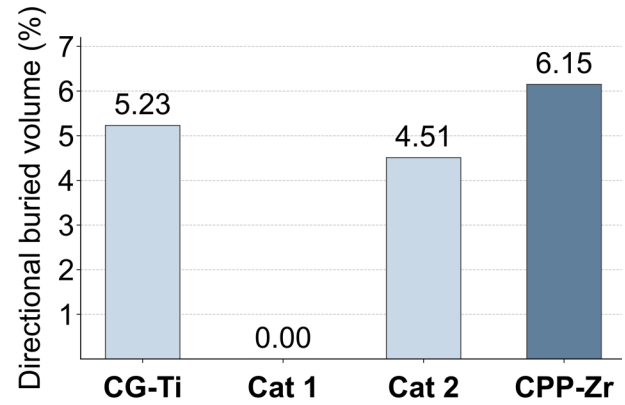

e

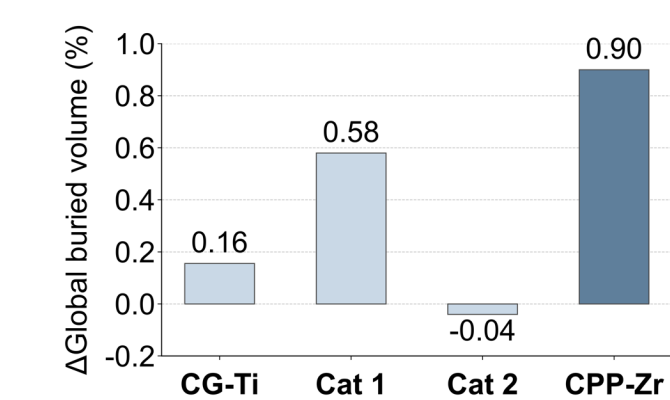

f

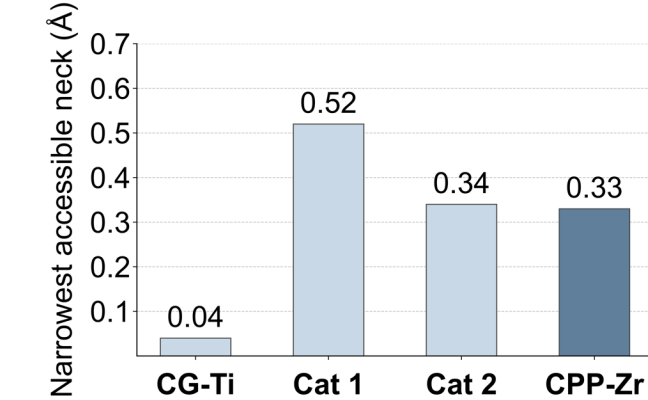

g

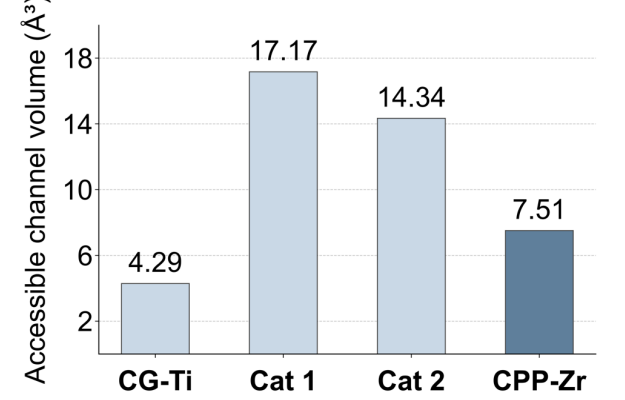

h

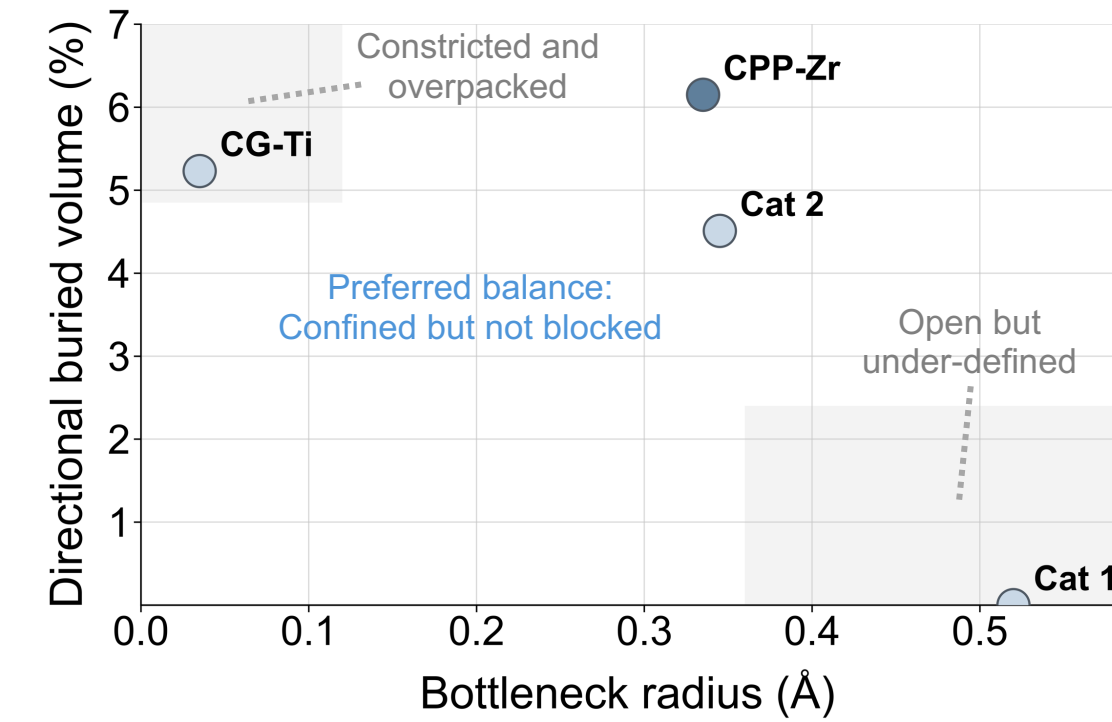

i

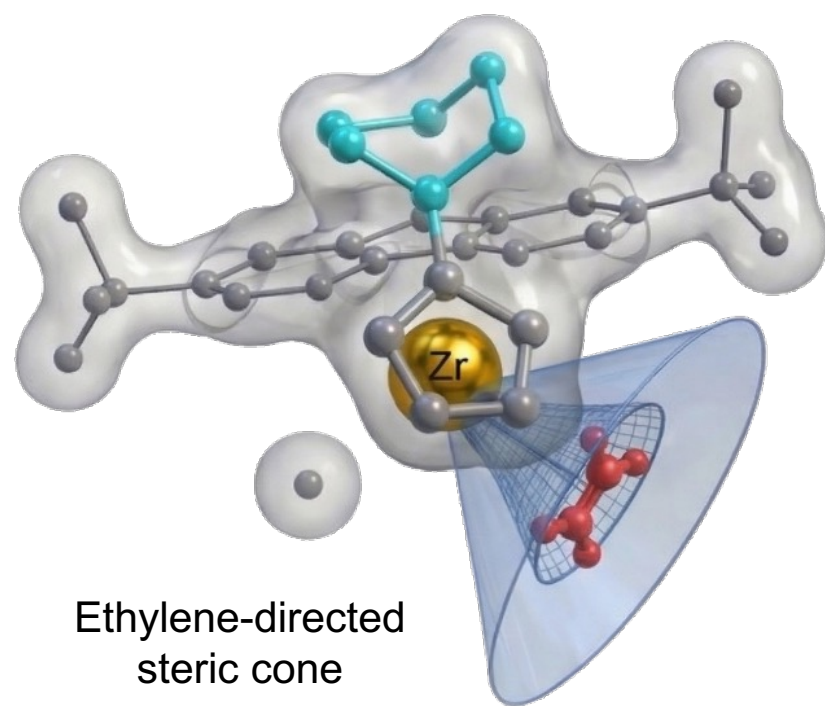

Supplement: Supplementary file 4 [file 9576bfd72098e782acdf33bc.pdf]

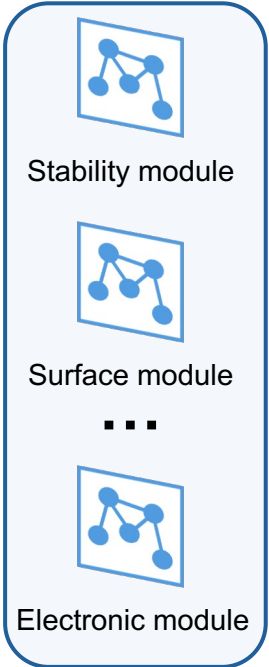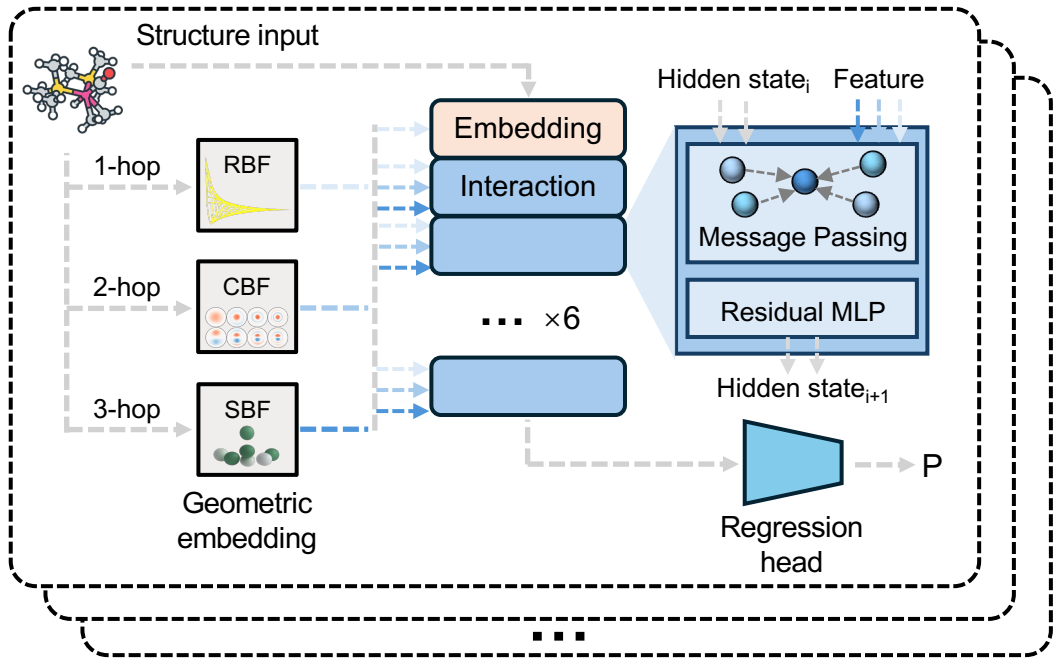

Supplement: Supplementary file 5 [file fbe3a398c551ccc048ffd4cb.pdf]
